# Supplementary material for: Why big brains? A comparison of models for both primate and carnivore brain size evolution
Source: PubMed Central journal article supplement (PMC8691615; doi:10.1371/journal.pone.0261185), 2021-12-21
Supplement: pone.0261185.s012.pdf [file pone.0261185.s012.pdf]

# PLOS ONE

## Why big brains? A comparison of models for both primate and carnivore brain size evolution --Manuscript Draft--

|                               |                                                                                                                                                                                                                                                                                                                                                                                                                                                                                                                                                                                                                                                                                                                                                                                                                                                                                                                                                                                                                                                                                                                                                                                                                                                                                                                                                                                                                                                                                                                                                                                                                                                                                             |
|-------------------------------|---------------------------------------------------------------------------------------------------------------------------------------------------------------------------------------------------------------------------------------------------------------------------------------------------------------------------------------------------------------------------------------------------------------------------------------------------------------------------------------------------------------------------------------------------------------------------------------------------------------------------------------------------------------------------------------------------------------------------------------------------------------------------------------------------------------------------------------------------------------------------------------------------------------------------------------------------------------------------------------------------------------------------------------------------------------------------------------------------------------------------------------------------------------------------------------------------------------------------------------------------------------------------------------------------------------------------------------------------------------------------------------------------------------------------------------------------------------------------------------------------------------------------------------------------------------------------------------------------------------------------------------------------------------------------------------------|
| <b>Manuscript Number:</b>     | PONE-D-21-12399R1                                                                                                                                                                                                                                                                                                                                                                                                                                                                                                                                                                                                                                                                                                                                                                                                                                                                                                                                                                                                                                                                                                                                                                                                                                                                                                                                                                                                                                                                                                                                                                                                                                                                           |
| <b>Article Type:</b>          | Research Article                                                                                                                                                                                                                                                                                                                                                                                                                                                                                                                                                                                                                                                                                                                                                                                                                                                                                                                                                                                                                                                                                                                                                                                                                                                                                                                                                                                                                                                                                                                                                                                                                                                                            |
| <b>Full Title:</b>            | Why big brains? A comparison of models for both primate and carnivore brain size evolution                                                                                                                                                                                                                                                                                                                                                                                                                                                                                                                                                                                                                                                                                                                                                                                                                                                                                                                                                                                                                                                                                                                                                                                                                                                                                                                                                                                                                                                                                                                                                                                                  |
| <b>Short Title:</b>           | Why big brains?                                                                                                                                                                                                                                                                                                                                                                                                                                                                                                                                                                                                                                                                                                                                                                                                                                                                                                                                                                                                                                                                                                                                                                                                                                                                                                                                                                                                                                                                                                                                                                                                                                                                             |
| <b>Corresponding Author:</b>  | Helen Rebecca Chambers<br>University of Salford<br>Salford, Greater Manchester UNITED KINGDOM                                                                                                                                                                                                                                                                                                                                                                                                                                                                                                                                                                                                                                                                                                                                                                                                                                                                                                                                                                                                                                                                                                                                                                                                                                                                                                                                                                                                                                                                                                                                                                                               |
| <b>Keywords:</b>              | Brain size; primates; carnivores; sociality; diet; encephalisation                                                                                                                                                                                                                                                                                                                                                                                                                                                                                                                                                                                                                                                                                                                                                                                                                                                                                                                                                                                                                                                                                                                                                                                                                                                                                                                                                                                                                                                                                                                                                                                                                          |
| <b>Abstract:</b>              | <p>Despite decades of research, much uncertainty remains regarding the selection pressures responsible for brain size variation. Whilst the influential social brain hypothesis once garnered extensive support, more recent studies have failed to find support for a link between brain size and sociality. Instead, it appears there is now substantial evidence suggesting ecology better predicts brain size in both primates and carnivores. Here, different models of brain evolution were tested, and the relative importance of social, ecological, and life-history traits were assessed on both overall encephalisation and specific brain regions. In primates, evidence is found for consistent associations between brain size and ecological factors, particularly diet; however, evidence was also found advocating sociality as a selection pressure driving brain size. In carnivores, evidence suggests ecological variables, most notably home range size, are influencing brain size; whereas, no support is found for the social brain hypothesis, perhaps reflecting the fact sociality appears to be limited to a select few taxa. Life-history associations reveal complex selection mechanisms to be counterbalancing the costs associated with expensive brain tissue through extended developmental periods, reduced fertility, and extended maximum lifespan. Future studies should give careful consideration of the methods chosen for measuring brain size, investigate both whole brain and specific brain regions where possible, and look to integrate multiple variables, thus fully capturing all of the potential factors influencing brain size.</p> |
| <b>Order of Authors:</b>      | Helen Rebecca Chambers<br>Sandra Andrea Heldstab<br>Sean J O'Hara                                                                                                                                                                                                                                                                                                                                                                                                                                                                                                                                                                                                                                                                                                                                                                                                                                                                                                                                                                                                                                                                                                                                                                                                                                                                                                                                                                                                                                                                                                                                                                                                                           |
| <b>Response to Reviewers:</b> | <p>Reviewer #1</p> <p>1) I am not sure why this manuscript deals with just primates and carnivores. Why these two orders of mammals? Why not other orders such as rodents, lagomorphs, shrews, and bats? In fact, there are plenty of extensive datasets for these (and other) orders. For example, see Mace et al (1981) J. Zool. 193:333-354, which presents brain size data for 261 species of terrestrial small mammals, and Hutcheon et al. (2002) Brain Behavior Evolution 60:165-180 for 63 species of bats. I would have thought that a comparative approach across the entire class Mammalia would have been more fruitful than simply presenting data on primates and (incongruously) carnivores. The authors make no attempt to justify their selection of mammalian orders.</p> <p>Whilst we understand that brain data are available for more species than which were included within the manuscript, we wanted to run analyses on a complete dataset with all covariates available for all species, as this enabled more robust analyses, especially when conducting model comparisons. We could access all the required covariates for primates and carnivores, which governed our choice. In addition, in efforts to address the current confusion within the field regarding the proposed selection pressures responsible for increased brain size, we chose to use both primate and carnivore data as these two groups have received considerable attention, and thus by drawing clarity</p>                                                                                                                                                                              |

within these two groups, further groups can be studied using more appropriate methods/procedures. We have added wording to emphasise our reasoning for this choice.

2) The literature cited is not representative of the field. A good deal of previous work has been omitted from this ms, including the two papers mentioned in (1) above, as well as Harvey et al. (1980) PNAS 77:4387-4389 (this paper explicitly deals with primate brain sizes). And there are many more papers that deal with ecological correlates of brain sizes that have not been mentioned.

Additional citations have been added.

3) Although the manuscript is generally well written, there are some sections that are difficult to interpret and/or to follow. This is particularly true for the Methods section, which is often ambiguous or at least incomplete. See below for where more detail is needed.

Wording has been rephrased for added clarity.

4) There is no definition of what is meant by the different brain volumes that are presented in the ms. For example, how was "endocranial brain volume" measured? And was it measured in the same way in the different papers where this information was extracted and collated? If not, then how can we be sure that we are comparing like with like?

5) The same comment applies to "neocortex" and "cerebellum" volumes.

Definitions have been added for endocranial and regional brain volumes. When sourcing all whole and regional brain volumes these measurement methods were considered to ensure the data was comparable. In terms of the ECV data, sources were checked for comparability and common measurement techniques were found between studies. We further tried to minimise the risk of this problem by sourcing data from whole datasets e.g., DeCasien et al., 2019 where the information has been weighted to account for multiple methods. However, this was more difficult with the carnivore data where regional brain volume data was tricky to source.

6) Again, how was social cohesion measured? I can see that it was scored on a point system of 1 to 4, but what does it mean for a species to have a social cohesion of 1? or 2? etc.

Definition revised for greater clarity.

7) I found the ecological data simplistic and not at all credible. The authors will need to justify exactly what they mean by each of the ecological variables. And then, they will need to convince the reader that the ecological data are actually meaningful. I am happy to include "diet" (although "frugivore" or "omnivore" are diet categories rather than strictly speaking diet itself (and the authors actually refer to diet categories, but they don't explicitly make the distinction). But what do they mean by diet breadth? According to their definition it is: "dietary breadth was also used, estimated using the total number of food sources used by a species". But what are these "food sources"? Are they the number of species of plants/animals taken? If so, an insectivorous species will by definition have a wider breadth than a carnivorous one (because there are more species of insects than vertebrates). If "sources" refers to something else, then what is it? And then, once the definition has been clearly stated, how can we be sure that the different studies have scored "number of food sources" in the same way?

Definitions of dietary categories and dietary breadth revised for greater clarity. All dietary breadth data was taken from one source: Wilman et al., (2014) and is referred to in the manuscript.

8) I have even more issue with the number of habitats used by a species. Wider ranging species will use a greater number of habitats, so why didn't the authors correct for this? Or simply use distributional range size instead of number of habitats?

Whilst we understand and appreciate this point, it does not always follow that wider ranging species will always use a greater number of habitats. One species may have a large home range size but may only move within the same habitat type. What we instead aim to look at here is whether the type of habitat matters, thus, do species which navigate and confront multiple habitat types, have larger brains than those which only move within one or two habitat types? Or vice versa? We also use home range size to proxy habitat use.

9) The authors do not mention where they get their home range sizes from in the ms (although these are clearly mentioned in the supplementary material). I find it hard to believe that the various range sizes compiled by numerous authors will be directly comparable due to differences in techniques used to estimate home range. Furthermore, there is enormous amount of variation in home range size, which is partly (and only partly) attributable to sex and age. Using a single metric is hardly informative or convincing.

We did not want to mention the citations specifically within the manuscript due to the high number of citations. We agree with this point about transferability of the methods used to measure home range size. We did our best to reduce the number of sources due to this problem, however, due to limited data availability, the only way to retrieve home range size for all species was to use data from multiple studies. To minimise the issue highlighted, we chose to use hectares to measure home range size as this was the most prevalent method found. We converted all home range data collected to this metric. We agree a single metric is not always useful, which is why we used both habitat variability and home range size to proxy habitat use.

10) Statistical analysis. This entire section (lines 218 to 239) needs to be reworked and more detail provided. And unambiguous statements rephrased. I will make just a few examples (but these are not the only problems).

Wording has been rephrased for clarity.

11) Lines 219-220 "using residuals from a regression line". Regression of what on what? And exactly using what regression? Simple linear regression e.g.  $lm()$ ? On log transformed or untransformed data?

Phrase removed as this aspect has been moved to supplementary methods. This regression analysis is discussed in full within that document... "Phylogenetic generalised least-squares regression analysis (PGLS) was used to regress log brain volume against log body mass".

12) What is the encephalisation quotient and how was it calculated? In fact, the equation is presented a bit further down, so perhaps the authors just need to refer to this e.g. say something like "see below for equation".

Definition revised for greater clarity. This aspect – as mentioned above – has been moved to the supplementary methods.

13) Line 220. "The former method is often preferred...". But you can't use "former" when there are three methods presented. "Former" and "latter" can only be used when comparing two things.

Thank you for highlighting. Phrase removed.

14) Line 226. "...therefore we considered it prudent to use both methods in the analyses...". Which two methods are being referred to? Because the authors have mentioned three methods (which have even been numbered).

Phrase removed.

15) Please provide a basic description of "Phylogenetic generalised least-squares regression analysis" and how it differs from typical GLMs.

Definition revised to provide greater clarity.

16) VIF was used to check for collinearity (which is good). But what does it mean "almost all scores" were below 5. Which variables were autocorrelated? And were any removed from the analyses, as a result of this?

Almost all VIF scores produced were below 5, however there were a few outliers. For example, body mass and weaning age produced scores of 7.25 and 5.93, when inputted into the primate endocranial model. Whilst moderately high, we chose to retain all variables within the statistical models, as the scores were only found in a few models and were still considerably low. Thus, no variables were removed from the analyses. VIF scores were also checked when rerunning analyses, specifically when using the 'rest of brain' regional volume technique, with no scores produced of concern.

This sentence has been updated to provide greater clarity.

17) Possible limitations. I find this paragraph difficult to accept. The authors are well aware that any models with AICs within 2 points are not "statistically different". Then how can they justify their approach? To me, this is the weakest aspect of the ms, because it affects all of their interpretations. There must be better ways of dealing with this. For example, list all competing models, and then count the number of times a particular variable (e.g. social cohesion) appears in the top models? This may make the results much more difficult to interpret, but this may be because there really is no simple and easy answer to the question that they are asking. Simplifying a complex problem with incorrect statistics is not acceptable.

We appreciate this comment. We agree this was a weak point in the analyses. To address this highlighted shortcoming, rather than just choosing the model with the absolute lowest score, we have now adopted the approach of presenting and discussing the results of all the 'best fit' models, which usually included a subset of models (simply, all the models within 2 points of the absolute lowest model). We have also rerun the analysis using BIC rather than AIC, in acknowledgement of this scoring system being more conservative.

Reviewer #2

•Line 33: See my comment in the Discussion section on the use of "counterbalancing".

Wording rephrased.

•There is a critical part currently missing this section, which is an explicit discussion of how this study is different from the many previous analyses of brain ~ socioecology relationships (e.g., inclusion of more variables, updated phylogeny, higher individual/species sample sizes)?

Thank you for this comment, we agree this was lacking in the manuscript. Introduction has been updated with this discussion.

•Line 75: The importance of pair-bondedness to brain size evolution was also discussed in other papers, which should be cited here (Schillaci 2006, 2008; MacLean et al. 2009).

•Line 83: This reference is only for carnivores – please add a reference for primates.

Citations added.

•Paragraph starting with Line 90:

ol think a discussion of issues with relative brain size measures is important, however, I don't think it warrants using measures that have been previously established as inappropriate (i.e., residuals, EQ).

•Lines 141-144: Again, it is unnecessary to include analyses using EQ or brain size residuals.

•Lines 218-220: Again, it is unnecessary to include analyses using EQ or brain size residuals.

•Paragraph starting with Line 467: As previously mentioned, previous studies have demonstrated that the use of EQ or residuals is inappropriate, so I think this paragraph and the relevant results are unnecessary and make the overall findings harder to

follow.

We appreciate that these methods have previously been suggested to be inappropriate for measuring the relationship between brain size and body mass. We feel it is necessary to further address this problem, however, especially considering we are using updated data, updated statistical analysis, more variables and an updated phylogenetic tree. After considering this point, we decided to move the results produced using the methods of concern (i.e., residuals, EQ) to the supplementary material and these will no longer be discussed in the main manuscript. This moves the focus away from those methods, but still allows the comparison between methods which may be useful to some readers.

oThe findings from the most recent study on brain ~ body size evolution (Smears et al. 2021) should be considered/discussed here.

oFreckleton's (2009) "seven deadly sins of comparative analysis" should be mentioned here, as it includes a discussion on why it is inappropriate to use residuals as outcome variables in regression models.

oLines 105-107 – Papers on lag between primate brain and body size should be mentioned here (e.g., Deaner and Nunn 1999).

Thank you. Citations added.

oLine 108: It is unclear what "over statistically controlled methods" means here.

Wording rephrased.

oLine 109: How and why does van Schaik et al. (2021) specifically demonstrate that EQ is inappropriate? The authors should elaborate a bit here.

Some elaboration has been added, as recommended.

•Paragraph starting with Line 111:

oHow would social and ecological variables specifically relate to neocortical and cerebellar functions?

•Increased brain size is the result of selection on specific abilities and related neural systems. Accordingly, at some point in this Introduction, I would appreciate a brief but explicit discussion of this (e.g., why might frugivory require greater visual information processing? Given that a large proportion of the brain is neocortex, and a large proportion of the neocortex is comprised of visual information processing areas, might this explain the link between something like frugivory and overall brain size?)

These points are now discussed.

oI think it would be appropriate to discuss Powell et al. (2019) here (currently only mentioned in the Discussion).

Powell et al., (2019) has been discussed further in the methods section.

•Line 126: What kind of "models"?

Sentence has been elaborated upon.

•Line 155: Please add sample sizes for the neocortex and cerebellum.

Sample sizes updated.

•Lines 157-161: This is Introduction material and should be removed from the Methods.

•Paragraph starting with Line 163: It might be useful to include some of this in the Introduction, since readers have any background surrounding issues with various "social complexity" measures.

•All descriptions of the links between socioecological variables and selection for cognitive abilities would be more appropriate in the Introduction.

These sections have been moved to the introduction.

•Lines 171-174: What were levels 2 and 3? How were pairbonded species or those that only sleep in pairs categorized? These levels need more explanation, especially since this “social cohesion” proxy was included in many best fit models in the Results.

Agreed. Definition revised for greater clarity.

•Lines 196-197: Diet imposes both temporal and spatial cognitive demands, so I suggest re-wording this.

•Lines 200-203: The authors appear to be suggesting that certain life history variables are drivers of evolutionary changes in brain size. I suggest altering the language here to mimic that in Lines 421-424.

Sentences rephrased for clarity.

•Paragraph starting with Line 200: This section is missing a discussion of ideas that the relationship between brain size and lifespan is driven by maternal investment and between specific brain regions and developmental periods (see e.g., Barton et al. 2011; Powell et al. 2019)

This point has been discussed.

•Lines 238-239: Why was body mass used as the covariate for the neocortex and cerebellum models? Many other papers have used brain size (with the brain region of interest removed) or medulla size as a covariate. This decision should be justified in the text or analyses should be re-run using a brain size measure.

Thank you for this comment, we agree that this method needed to be altered. Neocortex and cerebellum size were recalculated using endocranial volume minus the brain region of interest. Analyses were re-run using this brain size measure. The method (brain transformations) section has been updated to reflect this change.

•Model comparisons section:

oThis section as written is unclear – were the best fit models within Models 1-4 first identified, and then combined to make Model 5?

oIn any case, I do not think this approach is appropriate since it may, in some cases, force the inclusion of low information variables into the “combined” model. It would be more appropriate to create models that include all combinations of all predictor variables, compare these models using information criterion (I suggest using BIC since it is more conservative), and then select the best fit model or subset of models (e.g., all models with  $\Delta BIC < 2$ ) to present detailed results.

Models one to four contained all combinations of the predictor variables, specifically looking at 1) social, 2) ecological, 3) social & ecological and 4) life history. Then usually models 3 and 4 were combined to determine whether incorporating the models together produced a better information criterion score. I say usually because sometimes incorporating social variables did not improve the score, therefore models 2 and 4 were combined instead. This combined model was also compared against a model including all variables together. We chose to use this ‘combined’ model because it would take too much time to try every combination of the 11 variables, therefore we thought by combining best fit models, this would bypass this problem and produce superior models. We appreciate your comment about the inclusion of low information variables, and it is definitely something we considered. After your suggestion, to better address the issue, the analyses have been re-run using BIC instead of AIC, due to the fact it is more conservative and would reduce the likelihood of low information variables being included. We also chose to present the results of the ‘best fit’ models, which was usually a subset of models (presenting all models within  $\Delta BIC < 2$  of the absolute lowest model).

•Lines 260-261: The meaning of “presently, and subsequently” is unclear.

Phrase removed for clarity.

•This section is a bit difficult to follow as written. I suggest, within each section, more clearing separating/identifying the different groups of results. I think it would be most



appropriate to first discuss results using the information criterion (i.e., tell the readers which variables are included in the best fit models) and then the frequentist results (i.e., tell the readers which coefficient estimates within the best fit model are “significant” and the direction of the relationship)?

Thank you for this comment, we agree and the results section has been rewritten to allow greater clarity.

•Table 2: The diet category results (DFrug, DOmni) only demonstrate differences between these dietary groups (frugivory and omnivory) and folivory. This needs to be explicitly stated in the relevant areas of the results section. In addition, models should be run with the levels switched so that potential differences between frugivory and omnivory can also be tested.

Thank you for this comment, we agree that this needed highlighting. This has now been explicitly stated in the primate results section. In addition, as suggested, models were run with the levels switched, to identify any potential differences between frugivory and omnivory. This was checked on all ‘best fit’ models where diet was included, thus, on both the primate neocortex and cerebellum combined models. To do this, primate regional volume data was used, with linear regression models implemented, using the same combination of variables seen in the combined models (Neo ~ D + HR + ML + WA, Cere ~ D + HR + ML + WA).

Just included for your information...

Looking at primate neocortex data, when folivory was used as the baseline, negative significant associations were found with both omnivory and frugivory. However, when frugivory was used as the baseline, a positive association was found with folivory, whereas a negative association was found with omnivory. When omnivory was used as the baseline, positive associations were found with both frugivory and folivory. Thus, folivores appear to have larger neocortex volumes when compared to those with frugivorous and omnivorous diets, and this statement holds when the levels are switched (frugivorous and omnivorous species have smaller neocortex volumes when compared to those with a folivorous diet). However, frugivores appear to have larger neocortex volumes when compared to omnivores, and again, this statement holds when the levels are switched (omnivorous species have smaller neocortex sizes when compared to frugivorous species).

Looking at primate cerebellum data, the results are similar; both folivorous and frugivorous species appear to have larger cerebellar volumes when compared to those with an omnivorous diet, with this statement holding when the levels are switched (omnivorous species have smaller cerebellum volumes when compared to those with folivorous and frugivorous diets). However, there appears to be no discernible difference between folivorous and frugivorous species in terms of cerebellum volume.

•Lines 287-288 and 303-304: Table 2 includes results from best fit models only – it would be appropriate to also mention Table 1.

Table 1 has also been mentioned.

•Lines 288-289: Diet is not included in the best fit model for ECV in Table 1, so I am a bit confused about the claim that diet is positively associated with all brain measures.

What we meant by this sentence was that diet as a whole (dietary categories or dietary breadth) was associated with all brain measures. We agree this should have been better worded. This sentence has been removed, however, following the recommendation to no longer discuss the different brain measures in the main manuscript.

•Paragraph starting in Line 345: The home range results for the neocortex are not mentioned.

Thank you for pointing this out. We have now ensured all results are now appropriately discussed.

|  |                                                                                                                                                                                                                                                                                                                                                                                                                                                                                                                                                                                                                                                                                                                                                                                                                                                                                                                                                                                                                                                                                                                                                                                                                                                                                                                                                                                                                                                                                                                                                                                                                                                                                                                                                                                                                  |
|--|------------------------------------------------------------------------------------------------------------------------------------------------------------------------------------------------------------------------------------------------------------------------------------------------------------------------------------------------------------------------------------------------------------------------------------------------------------------------------------------------------------------------------------------------------------------------------------------------------------------------------------------------------------------------------------------------------------------------------------------------------------------------------------------------------------------------------------------------------------------------------------------------------------------------------------------------------------------------------------------------------------------------------------------------------------------------------------------------------------------------------------------------------------------------------------------------------------------------------------------------------------------------------------------------------------------------------------------------------------------------------------------------------------------------------------------------------------------------------------------------------------------------------------------------------------------------------------------------------------------------------------------------------------------------------------------------------------------------------------------------------------------------------------------------------------------|
|  | <ul style="list-style-type: none"> <li>•Lines 383-385: The finding that habitat variability is negatively correlated with relative brain size should be discussed in terms of previous work demonstrating a negative impact of seasonality on brain size (e.g., van Woerden et al. 2010).</li> </ul> <p>This correlation is no longer found after rerunning statistical analyses so has been removed.</p> <ul style="list-style-type: none"> <li>•Lines 409-410: This is not true. Powell et al. (2019) found correlations between specific brain regions (neocortex) and gestation length. Other regions were correlated with other developmental periods (e.g., cerebellum and juvenile period).</li> </ul> <p>Sentence updated to reflect this point.</p> <ul style="list-style-type: none"> <li>•Line 421: What does “counterbalance” mean? It sounds as if animals are actively participating in the evolution of these traits. Can the authors elaborate on how specific selection mechanisms would drive this “counterbalancing”?</li> </ul> <p>Sentence updated to reflect this point.</p> <ul style="list-style-type: none"> <li>•Lines 426-427: This sentence makes it seem that diet category is included in the best fit models for carnivores, which is not the case. I suggest removing the sentence.</li> </ul> <p>Sentence removed as recommended.</p> <ul style="list-style-type: none"> <li>•Lines 443-446: Sociality is not included in any of the best fit models of relative brain size, so this sentence is misleading as written.</li> </ul> <p>Sentence changed following reanalysis of data.</p> <ul style="list-style-type: none"> <li>•Lines 445-457: I would remove this sentence since the cerebellum is showing opposite trends across groups.</li> </ul> <p>Sentence removed.</p> |
|--|------------------------------------------------------------------------------------------------------------------------------------------------------------------------------------------------------------------------------------------------------------------------------------------------------------------------------------------------------------------------------------------------------------------------------------------------------------------------------------------------------------------------------------------------------------------------------------------------------------------------------------------------------------------------------------------------------------------------------------------------------------------------------------------------------------------------------------------------------------------------------------------------------------------------------------------------------------------------------------------------------------------------------------------------------------------------------------------------------------------------------------------------------------------------------------------------------------------------------------------------------------------------------------------------------------------------------------------------------------------------------------------------------------------------------------------------------------------------------------------------------------------------------------------------------------------------------------------------------------------------------------------------------------------------------------------------------------------------------------------------------------------------------------------------------------------|

**Additional Information:**

| Question | Response |
|----------|----------|
|----------|----------|

|                                                                                                                                                                                                                                                                                                                                                                                                                                                                                                     |                                                                  |
|-----------------------------------------------------------------------------------------------------------------------------------------------------------------------------------------------------------------------------------------------------------------------------------------------------------------------------------------------------------------------------------------------------------------------------------------------------------------------------------------------------|------------------------------------------------------------------|
| <p><b>Financial Disclosure</b></p> <p>Enter a financial disclosure statement that describes the sources of funding for the work included in this submission. Review the <a href="#">submission guidelines</a> for detailed requirements. View published research articles from <a href="#">PLOS ONE</a> for specific examples.</p> <p>This statement is required for submission and <b>will appear in the published article</b> if the submission is accepted. Please make sure it is accurate.</p> | <p>The author(s) received no specific funding for this work.</p> |
|-----------------------------------------------------------------------------------------------------------------------------------------------------------------------------------------------------------------------------------------------------------------------------------------------------------------------------------------------------------------------------------------------------------------------------------------------------------------------------------------------------|------------------------------------------------------------------|



**Unfunded studies**

Enter: *The author(s) received no specific funding for this work.*

**Funded studies**

Enter a statement with the following details:

- Initials of the authors who received each award
- Grant numbers awarded to each author
- The full name of each funder
- URL of each funder website
- Did the sponsors or funders play any role in the study design, data collection and analysis, decision to publish, or preparation of the manuscript?
- **NO** - Include this sentence at the end of your statement: *The funders had no role in study design, data collection and analysis, decision to publish, or preparation of the manuscript.*
- **YES** - Specify the role(s) played.

\* typeset

**Competing Interests**

Use the instructions below to enter a competing interest statement for this submission. On behalf of all authors, disclose any [competing interests](#) that could be perceived to bias this work—acknowledging all financial support and any other relevant financial or non-financial competing interests.

This statement is **required** for submission and **will appear in the published article** if the submission is accepted. Please make sure it is accurate and that any funding sources listed in your Funding Information later in the submission form are also declared in your Financial Disclosure statement.

View published research articles from [PLOS ONE](#) for specific examples.

The authors have declared that no competing interests exist.

**NO authors have competing interests**

Enter: *The authors have declared that no competing interests exist.*

**Authors with competing interests**

Enter competing interest details beginning with this statement:

*I have read the journal's policy and the authors of this manuscript have the following competing interests: [insert competing interests here]*

\* typeset

**Ethics Statement**

N/A

Enter an ethics statement for this submission. This statement is required if the study involved:

- Human participants
- Human specimens or tissue
- Vertebrate animals or cephalopods
- Vertebrate embryos or tissues
- Field research

Write "N/A" if the submission does not require an ethics statement.

General guidance is provided below. Consult the [submission guidelines](#) for detailed instructions. **Make sure that all information entered here is included in the Methods section of the manuscript.**

## Format for specific study types

### Human Subject Research (involving human participants and/or tissue)

- Give the name of the institutional review board or ethics committee that approved the study
- Include the approval number and/or a statement indicating approval of this research
- Indicate the form of consent obtained (written/oral) or the reason that consent was not obtained (e.g. the data were analyzed anonymously)

### Animal Research (involving vertebrate animals, embryos or tissues)

- Provide the name of the Institutional Animal Care and Use Committee (IACUC) or other relevant ethics board that reviewed the study protocol, and indicate whether they approved this research or granted a formal waiver of ethical approval
- Include an approval number if one was obtained
- If the study involved *non-human primates*, add *additional details* about animal welfare and steps taken to ameliorate suffering
- If anesthesia, euthanasia, or any kind of animal sacrifice is part of the study, include briefly which substances and/or methods were applied

### Field Research

Include the following details if this study involves the collection of plant, animal, or other materials from a natural setting:

- Field permit number
- Name of the institution or relevant body that granted permission

### Data Availability

Authors are required to make all data underlying the findings described fully available, without restriction, and from the time of publication. PLOS allows rare exceptions to address legal and ethical concerns. See the [PLOS Data Policy](#) and [FAQ](#) for detailed information.

Yes - all data are fully available without restriction

A Data Availability Statement describing where the data can be found is required at submission. Your answers to this question constitute the Data Availability Statement and **will be published in the article**, if accepted.

**Important:** Stating 'data available on request from the author' is not sufficient. If your data are only available upon request, select 'No' for the first question and explain your exceptional situation in the text box.

Do the authors confirm that all data underlying the findings described in their manuscript are fully available without restriction?

**Describe where the data may be found in full sentences. If you are copying our sample text, replace any instances of XXX with the appropriate details.**

- If the data are **held or will be held in a public repository**, include URLs, accession numbers or DOIs. If this information will only be available after acceptance, indicate this by ticking the box below. For example: *All XXX files are available from the XXX database (accession number(s) XXX, XXX).*
- If the data are all contained **within the manuscript and/or Supporting Information files**, enter the following:  
*All relevant data are within the manuscript and its Supporting Information files.*
- If neither of these applies but you are able to provide **details of access elsewhere**, with or without limitations, please do so. For example:

*Data cannot be shared publicly because of [XXX]. Data are available from the XXX Institutional Data Access / Ethics Committee (contact via XXX) for researchers who meet the criteria for access to confidential data.*

*The data underlying the results presented in the study are available from (include the name of the third party*

All relevant data are within the manuscript and its Supporting Information files.

|                                                                                                                                                                                                                                         |  |
|-----------------------------------------------------------------------------------------------------------------------------------------------------------------------------------------------------------------------------------------|--|
| <p><i>and contact information or URL).</i></p> <ul style="list-style-type: none"><li>• This text is appropriate if the data are owned by a third party and authors do not have permission to share the data.</li></ul> <p>* typeset</p> |  |
| Additional data availability information:                                                                                                                                                                                               |  |



## 19 **Abstract**

20 Despite decades of research, much uncertainty remains regarding the selection pressures  
21 responsible for brain size variation. Whilst the influential social brain hypothesis once  
22 garnered extensive support, more recent studies have failed to find support for a link  
23 between brain size and sociality. Instead, it appears there is now substantial evidence  
24 suggesting ecology better predicts brain size in both primates and carnivores. Here,  
25 different models of brain evolution were tested, and the relative importance of social,  
26 ecological, and life-history traits were assessed on both overall encephalisation and specific  
27 brain regions. In primates, evidence is found for consistent associations between brain size  
28 and ecological factors, particularly diet; however, evidence was also found advocating  
29 sociality as a selection pressure driving brain size. In carnivores, evidence suggests ecological  
30 variables, most notably home range size, are influencing brain size; whereas, no support is  
31 found for the social brain hypothesis, perhaps reflecting the fact sociality appears to be  
32 limited to a select few taxa. Life-history associations reveal complex selection mechanisms  
33 to be counterbalancing the costs associated with expensive brain tissue through extended  
34 developmental periods, reduced fertility, and extended maximum lifespan. Future studies  
35 should give careful consideration of the methods chosen for measuring brain size,  
36 investigate both whole brain and specific brain regions where possible, and look to integrate  
37 multiple variables, thus fully capturing all of the potential factors influencing brain size.

38 **Key words:** brain size, primates, carnivores, sociality, diet, encephalisation

39

40



## 41 **Introduction**

42 Brain size varies considerably amongst mammals; substantial variation is seen among  
43 primates, where brain size varies almost a thousand-fold across the order [1]. The adaptive  
44 value of such variation has come under extensive scrutiny over the past few decades and  
45 yet despite considerable research effort, much uncertainty remains regarding the selection  
46 pressures responsible.

47 Frequently proposed to explain variation in brain size are factors related to the physical  
48 environment, such as diet and home range size, as well as factors related to the social  
49 environment, such as group size and pair-bondedness. Ecological hypotheses mainly involve  
50 investigating the cognitive demands associated with foraging [2-7], as foraging is considered  
51 mentally demanding due to the pressure of managing, processing and remembering spatial  
52 and temporal information about resource availability [8-12]. Additionally, differing home  
53 range size is of interest to researchers due to the supposed cognitive demands imposed by  
54 larger home ranges, such as processing requirements of navigating spatially-complex  
55 information, especially in terms of food availability, location and distribution [9, 13-15]. This  
56 has resulted in many studies investigating the cumulative effects of the physical  
57 environment on encephalisation, with a specific interest in diet [16-20], home range [13,  
58 14], foraging techniques [12, 21-23] and behavioural responses in a fluctuating environment  
59 [24].

60 In contrast to ecological hypotheses, the social brain hypothesis (SBH) suggests sociality –  
61 specifically the cognitive demands of tracking, negotiating and maintaining social  
62 relationships – to be the main driving force behind variation in primate brain sizes [25-27].

63 The study of primates lends credence to this hypothesis, with brain size found to correlate

64 with many social proxies, such as social group size [28], tactical deception [29] and grooming  
65 clique size [30]. Evidence has since not been limited to studies of the primate lineage, with  
66 corroboration coming from research on spotted hyenas [31, 32] as well as other carnivorans  
67 [33-35], ungulates [36, 37], birds [38-40], and some fish species [41-43]. The focal point of  
68 much of the early work investigating sociality was social group size, due to the information-  
69 processing demands group of increasing sizes are thought to incur [26]. However, the use of  
70 this proxy for measuring social complexity has been criticised [44] and instead, focus has  
71 shifted to the consequences of varying levels of relationship complexity [45], and toward  
72 investigating the influence of pair-bondedness [27, 46-48]. This developed from the  
73 proposition that relationship quality [45, 49] connotes cognitive complexity.

74 Despite the hypothesis receiving considerable support in the past, more recent  
75 investigations have failed to find statistical support for a link between brain size and  
76 sociality [14, 19, 20, 50, 51]. Instead, it appears there is now substantial, strong,  
77 phylogenetically-corrected comparative data reinforcing the assertion that diet better  
78 predicts brain size in both primates and carnivores [14, 20, 52]. In addition, the obvious  
79 exceptions to the SBH, taxa ~~who~~ possess large brains but ~~who~~ are not considered social,  
80 suggest factors other than sociality may be influencing brain size [19, 53, 54]. For example, if  
81 sociality is to be accepted as the causal agent for increased encephalisation in mammals, it  
82 should be widespread across bears and musteloids, ~~who~~ show similar encephalisation  
83 increases to Canidae [55].

84 A further problem to have dogged comparative analyses of brain evolution is deciding on  
85 the correct brain measure. Whilst most studies tend to focus on whole brain size, even this  
86 can become an arduous task since there is little clarity in the literature regarding the most  
87 appropriate body size correction factor, making decisions on the correct method of choice

88 challenging. Typically, cognitive abilities are estimated using relative brain size, by taking  
89 residuals from a regression curve or calculating encephalisation quotients [56, 57]. This  
90 became the method of choice when brain and body size were found to be tightly coupled  
91 allometrically across vertebrates; therefore, accounting for this allometric relationship  
92 became of great importance [35, 58]. However, the use of relative brain size and  
93 encephalisation quotients is not without criticism; for example, using residuals as data  
94 points in regression models has been discouraged, as the estimates produced are thought to  
95 be biased, which influences subsequent analyses [59, 60]. Encephalisation quotients  
96 possibly reflect the result of recent decreases or increases in body size [61], evidence for  
97 such was uncovered by Swanson et al. [19]. They found carnivore brain size to lag behind  
98 body size over evolutionary time, therefore hinting that the use of brain estimates may be a  
99 poor representation of carnivore brain size. However, no evidence for a lag is found for  
100 primates [62], suggesting a taxonomic difference for this group. Alongside this, the  
101 prevalent use of relative brain size is thought to possibly hide other evolutionary pathways  
102 which may be influencing adaptations in body mass [63]. For example, a recent analysis of  
103 mammalian brain size found the brain-to-body relationship to uncover more than just  
104 selection on brain size, indicating relative brain size measures are not accurately capturing  
105 brain size variation [64]. Thus, van Schaik et al., [65] suggest the use of encephalisation  
106 quotients should be avoided in future studies, as EQs repeatedly fail to accurately predict  
107 brain size, and thus, varying levels of cognitive ability. For example, Deaner et al., [57] found  
108 absolute brain size measures, over statistically produced methods i.e., residuals, to be the  
109 best predictors of primate cognitive abilities.

110 Alongside the use of total brain size, particular emphasis has been put on specific brain  
111 regions in recent years. The social brain hypothesis suggests the neocortex is the brain

112 structure of interest, with primates' large brains thought to be mainly the consequence of a  
113 dramatic increase in neocortical volume [66-68]. The neocortex is thought foremost  
114 responsible for the processing of more demanding cognitive and social skills [69, 70]  
115 associated with intelligent and flexible behaviour [61]. Neocortical enlargement in primates  
116 is thought to be partly due to selection on visual mechanisms [71] which is important for  
117 frugivorous species, for example when needing to distinguish between fruits of different  
118 colours [72-74] or when manipulating small fruit and seeds that require fine motor  
119 coordination [75]. Alternatively, these visual mechanisms are thought to be important for  
120 processing complex and rapid social interactions, including understanding facial expressions,  
121 gaze direction and posture [76], suggesting that neocortical modifications associated with  
122 complex social lives primarily involve areas specialised for visual processing of social  
123 information [77]. In primates, the neocortex constitutes a substantial portion of the brain  
124 [66, 67] and a large proportion of the neocortex is comprised of visual information  
125 processing areas [71, 78, 79], which is thought to explain links found between frugivory and  
126 brain size (see [20]), as well as social group size and neocortex volume (see [1, 71]).  
127 Alongside research into the neocortex, attention is focused on the cerebellum and its  
128 importance. The cerebellum was found to co-evolve with the neocortex [61], with a  
129 significant correlation found between these two brain regions [80]. Increased cerebellar  
130 volume is suggested to allow increased processing capacity, in terms of enhanced motor  
131 abilities and manipulative abilities [81, 82]. For example, in primates positive correlations  
132 are found between cerebellum volume and extractive foraging techniques [1], as well as the  
133 presence of neural activation in the cerebellum during tool use in monkeys [83]. This  
134 highlights the influential role played by the cerebellum in technical intelligence [84].  
135 Alongside this, the cerebellum is thought to be important in social intelligence [1],

136 particularly in terms of the links between sensory-motor control and social interactions and  
137 understanding [85, 86]. Indeed, it is now thought the expansion of the cortico-cerebellar  
138 system is the primary driver of brain expansion in anthropoid primates [87], suggesting the  
139 increased behavioural complexity in mammals could be partly explained by selection on the  
140 cerebellum [88]. So much so, that Fernandes et al., [89] found residual cerebellar size to be  
141 the most appropriate proxy when compared to a measure of general intelligence; as  
142 cerebellar models produced the most similar model fit results when compared to those  
143 produced using a measure of general intelligence.

144 Here, using data aggregated from the literature the relative importance of social, ecological  
145 and life history traits are assessed on both overall encephalisation and specific brain regions,  
146 and different models of brain size evolution are tested. Considerable attention has been  
147 paid to primate brain evolution (e.g., [14, 20, 90, 91]) perhaps since there are substantial  
148 data available on this taxonomic group making comparative tests easy to implement.

149 Likewise, carnivorans are also now receiving attention (e.g., [19, 88, 92, 93]) since variation  
150 in their brain and body size, and ranging social and physical environments, makes them  
151 excellent models for these tests too. Indeed, most of the literature surrounding brain size  
152 hypotheses is based on analyses of these two groups.

153 One aim here, therefore, is to provide greater clarity within these two groups. Integrating  
154 predictors into a framework which allow the assessment of multiple hypotheses  
155 simultaneously has become increasingly important for tests of brain evolution [94, 95].

156 Therefore, phylogenetically-corrected generalised least squares (PGLS) models are used  
157 here to account for shared evolutionary history, whilst assessing the potential variables  
158 influencing encephalisation. We use a recently updated phylogenetic tree to ensure  
159 phylogenetic relationships are contemporary. Further, the inclusion of multiple variables

160 allows the comparison of multiple hypotheses, as well as models of varying complexity.  
161 While brain data are available for more taxa than are included in our dataset, we found  
162 some limitations on the completeness of the necessary covariate data. We present here our  
163 analyses of two orders where complete datasets with all covariates are available for all  
164 species, ensuring the most robust model comparisons.

165

## 166 **Methods**

### 167 **Data Collection**

#### 168 **Brain data**

169 Endocranial volume (ECV) and body mass data for primates ( $n = 83$ ) and carnivores ( $n = 85$ )  
170 were compiled from multiple sources (see supplementary material). Volumes were matched  
171 for species composition and predictor variables, and whilst this resulted in smaller sample  
172 sizes when compared to available brain data, in doing so it provided a complete dataset  
173 with all covariates available for all species, better enabling robust analyses. ECV data were  
174 preferred over brain mass data since it is thought ECV provides a more reliable estimate of  
175 brain size, due to the influence of preservation techniques on brain mass [96]. The standard  
176 technique for estimation of ECV is through filling the cranium with beads (or similar), which  
177 is then measured using a graduated cylinder or by weighing the beads and converting the  
178 weight to volume [96]. Neocortex and cerebellum volumes were also collated, where  
179 available, for both primates (Neo = 52, Cere = 49) and carnivores (Neo = 44, Cere = 38).  
180 Regional brain volumes are commonly measured using one of two different techniques:  
181 virtual endocasts (e.g., [19]) or physical sectioning of the individual brain volumes using

182 paraffin and staining substances (e.g., [97]). When sourcing whole and regional brain  
183 volumes these measurement methods were considered to ensure the data were  
184 comparable; for example, all ECV data sources used common measurement techniques (as  
185 described above) making the whole brain data comparable across multiple studies.

## 186 **Social data**

187 Both social group size and social cohesion data were collected for primates and carnivores.  
188 Group size – based on the simple principle that as group size increases the information-  
189 processing demands [26] and corresponding internal structures [98, 99] should also increase  
190 – became perhaps the most commonly used proxy for social complexity. Despite this, the  
191 use of this proxy has been criticised as it is often considered crude, weak, and not always  
192 relevant [44]. Greater attention is now paid to differing levels of relationship complexity [45]  
193 often indicated through the presence of pair-bonds [27, 34, 100]. Therefore, to ensure the  
194 influence of sociality was fully captured, alongside group size, a social cohesion proxy was  
195 used: a categorisation system ranging from 1) being primarily solitary living aside from  
196 breeding seasons, 2) pair-living, 3) fission-fusion societies, to 4) being obligatorily social  
197 (e.g., [91, 101]). This index aims to better encapsulate sociality, rather than relying solely on  
198 group size numbers.

## 199 **Ecological data**

200 Four ecological variables were chosen for analysis: dietary categories, dietary breadth,  
201 habitat variability and home range size. Dietary categories were assigned following previous  
202 designations in the published literature (see supplementary material for sources) and  
203 included six different categories: carnivorous, herbivorous, piscivorous, folivorous,  
204 frugivorous and omnivorous. Alongside this traditional classification system, dietary breadth



205 was also used, estimated using the total number of food sources used by a species, with  
206 data taken from [102]. This included a total of 10 different food types: invertebrates,  
207 mammals and birds, reptiles, fish, unknown vertebrates, scavenge, fruit, nectar, seed or  
208 other plant material, marked either as absent (0) or present (1). For this dataset, this  
209 resulted in a dietary breadth scale of one to six. Habitat variability, another ecological  
210 measure, was formed using data from the IUCN Red List [103], based on the total number of  
211 habitat-types used by a species, following the same habitat classification system used in the  
212 IUCN Red List. Additionally, home range size data were collected. By including variables  
213 related both to diet and habitat, it allowed greater incorporation of possible variables within  
214 the physical environment affecting brain size.

## 215 **Life-history data**

216 Life-history variables have been found to be critical in counterbalancing the costs of  
217 increased brain size and facilitating the growth of large brains [104]. In fact, they appear to  
218 be influencing the potential adaptive pathways available to a species [94], for example in  
219 terms of balancing shifting developmental and maturation periods. Developmental costs are  
220 also thought to influence correlations between specific primate brain structures and life  
221 history variables, with the neocortex most strongly correlated with gestation length, and the  
222 cerebellum with juvenile period length, suggesting that these brain regions exhibit distinct  
223 life-history correlates which concur with their unique developmental trajectories [105].  
224 Hence, it was necessary to include certain life history variables in the analysis to further  
225 understand how life-history characteristics potentially act as a filter [104, 106] for the  
226 production of large brains. Gestation length was chosen as it has received considerable  
227 attention and is thought to be of great importance in bypassing the constraints of

228 precociality in mammals and facilitating brain growth [107]. Maximum lifespan was included  
229 as there is substantial support that encephalisation is correlated with extended longevity  
230 [104], especially in primates [108, 109]. The relationship found between brain size and  
231 lifespan is thought to be driven primarily by maternal investment, with subsequent  
232 correlations found between specific brain regions and developmental periods, reflecting this  
233 brain size-lifespan association (see [105, 110]). Ultimately encephalisation has been found to  
234 correlate with expansion of most developmental life history stages, including an extended  
235 reproductive lifespan [111]. Therefore, data on age at first reproduction, weaning and  
236 fertility (measured as number of offspring per year) were added to our dataset (see  
237 supplementary material for sources).

## 238 **Statistical Analyses**

### 239 **Brain transformations**

240 Whole brain volumes were incorporated in analyses by simple incorporation of **log ECV**  
241 volume with log body mass included as a covariate. This method is often preferred over the  
242 use of residuals as variables in ecological datasets often covary thereby producing biased  
243 parameter estimates when calculating residuals [59]. Including body mass as a covariate in  
244 the model avoids this problem, controls for its effect on brain volume, as well as potentially  
245 controlling for any effects body mass may have on other variables included. Regional brain  
246 volumes were incorporated in analyses by simple incorporation of log ROB (rest of brain)  
247 volume. To calculate ROB volume for both the neocortex and cerebellum, a calculation was  
248 performed: whole brain volume minus the region volume of interest. This method has been  
249 previously implemented and proved useful in measuring relative regional brain volumes  
250 (e.g., [91]). Further analyses were also conducted in order to test how uniform results were

251 when using different brain size measures. The results of these analyses are displayed and  
252 discussed in the supplementary material.

### 253 **PGLS analysis**

254 All statistical analyses were performed using R 4.0.1, using the 'caper', 'ape' and 'geiger'  
255 packages. Phylogenetic generalised least-squares (PGLS) regression analysis was used to  
256 identify those variables influencing whole and regional brain evolution, whilst avoiding the  
257 problem of phylogenetic non-independence. This technique differs from standard  
258 generalised least squares analysis, as it uses knowledge of phylogenetic relationships or  
259 relatedness to produce estimates of the expected covariance across species [112]. Pagel's  $\lambda$   
260 was estimated by maximum likelihood. The tree used for all phylogenetic analyses was that  
261 of Upham et al's [113]. All continuous variables, brain volumes and body mass were log  
262 transformed prior to analysis to satisfy the assumption of normality. Variance Inflation  
263 Factor (VIF) scores were used to check for the presence of multicollinearity, with almost all  
264 scores found to be below 5, and no scores above 7. There were no scores produced which  
265 highlighted concern, and thus, all socioecological and life-history variables were retained for  
266 analysis (see supplementary material).

### 267 **Model comparisons**

268 A series of PGLS models were implemented which varied in complexity, including 1) social,  
269 2) ecological, 3) social and ecological, 4) life history and 5) variables of interest. Models one  
270 to four included all possible combinations of the selected variables; for example, the social  
271 model included i) group size, ii) social cohesion, iii) group size and social cohesion. BIC  
272 (Bayesian Information Criterion) values of each model were then compared [114]. As lower  
273 BIC values indicate the presence of better fitting, more parsimonious models, the model

274 with the lowest BIC value was deemed to best explain the data, therefore considered  
275 preferable and retained. BIC values were preferred over Akaike Information Criterion  
276 values because BIC resolves the problem of overfitting, by using a more conservative  
277 penalty for additional variables. Model number five was constructed using all variables  
278 previously highlighted of interest within the social, ecological, and life history models. This  
279 allowed us to compare the importance of social versus ecological models, as well as  
280 construct models including those variables that best explained the data. Once computed,  
281 model five was compared alongside the previous models, and those found to have the  
282 lowest BIC value were then considered the '*best fit*' models, which in some cases represents  
283 a subset of models (simply, any model within  $\Delta\text{BIC} < 2$  of the lowest model). This is because  
284 BIC values with a difference of between 2 and 6 indicate moderate evidence that the model  
285 with the lower BIC provides a relatively better model fit, whilst greater than 6 indicates  
286 strong evidence for improved fit.

## 287 **Results**

### 288 **Primates**

289 The results from PGLS analysis on the primate data are shown in Table 1. Almost all models  
290 were highly significant. For most models  $\lambda$  was close to one, indicative of a Brownian motion  
291 model of trait evolution; however, certain neocortex models stand in contrast to this, with  $\lambda$   
292 equal to zero, implying the data have no phylogenetic structure [84]. Combined models  
293 were preferred when investigating both whole and regional brain volumes, with significantly  
294 improved (equal or greater than two BIC units lower than another) BIC scores when  
295 combining variables indicated to be of importance in previous model iterations. When

296 comparing the influence of ecology versus sociality, ecological models were found to be  
 297 preferable to social models, evidenced by the presence of significantly improved BIC scores.  
 298

299 Table 1. Phylogenetic generalised least-squares (PGLS) regression analyses examining the effects of social,  
 300 ecological and life-history variables\* on primate whole and regional brain volumes.

| Brain input               | Overall model       | Preferred model                                                 | BIC score        | P                |
|---------------------------|---------------------|-----------------------------------------------------------------|------------------|------------------|
| <b>Endocranial volume</b> | Social              | ECV ~ Mass + SC                                                 | -184.199         | <0.001           |
|                           | Ecological          | ECV ~ Mass + DB                                                 | -190.8458        | <0.001           |
|                           | Social & Ecological | ECV ~ Mass + SC + DB                                            | -192.0528        | <0.001           |
|                           | Life History        | ECV ~ Mass + GL + ML + WA                                       | -201.2257        | <0.001           |
|                           | <b>Combined</b>     | <b>ECV ~ Mass + GS + DB + GL + ML + WA</b>                      | <b>-208.5244</b> | <b>&lt;0.001</b> |
|                           | All                 | ECV ~ Mass + GS + SC + D + DB + HV + HR + GL + ML + F + FR + WA | <b>-183.9911</b> | <0.001           |
| <b>Neocortex</b>          | Social              | Neo ~ SC                                                        | 36.43372         | <0.05            |
|                           | Ecological          | Neo ~ D + HR                                                    | 20.04            | <0.001           |
|                           | Social & Ecological | Neo ~ SC + D + HR                                               | 23.04369         | <0.001           |
|                           | Life History        | Neo ~ ML + WA                                                   | -9.507772        | <0.001           |
|                           | <b>Combined</b>     | <b>Neo ~ D + HR + ML + WA</b>                                   | <b>-17.54041</b> | <b>&lt;0.001</b> |
|                           | All                 | Neo ~ GS + SC + D + DB + HV + HR + GL + ML + F + FR + WA        | 9.397628         | <0.001           |
| <b>Cerebellum</b>         | Social              | Cere ~ SC                                                       | 26.55957         | <0.05            |
|                           | Ecological          | Cere ~ D + HR                                                   | 0.2775847        | <0.001           |
|                           | Social & Ecological | Cere ~ SC + D + HR                                              | 3.144599         | <0.001           |
|                           | Life History        | Cere ~ ML + WA                                                  | -17.40863        | <0.001           |
|                           | <b>Combined</b>     | <b>Cere ~ D + HR + ML + WA</b>                                  | <b>-25.9437</b>  | <b>&lt;0.001</b> |
|                           | All                 | Cere ~ GS + SC + D + DB + HV + HR + GL + ML + F + FR + WA       | -10.45452        | <0.001           |

301 \*GS = Group size, SC = Social cohesion, D = Diet, DB = Dietary breadth, HV = Habitat variability, HR = Home  
 302 range, GL = Gestation length, ML = Maximum longevity, F = Fertility, FR = Age at first reproduction, WA =  
 303 Weaning age.

### 304 Overall encephalisation

305 The results of PGLS analysis on endocranial volume data are presented in Table 1, with the  
 306 'best fit' models presented in Table 2. The variables which were indicated to be of

307 importance and included in the ‘*best fit*’ endocranial volume models were: group size,  
 308 dietary breadth, gestation length, maximum lifespan and weaning age. Also present in the  
 309 subset of ‘*best fit*’ models were: social cohesion and home range. After accounting for  
 310 phylogeny, both group size and social cohesion were found to be positively associated with  
 311 ECV (P <0.05). Although, social cohesion failed to reach significance in certain model  
 312 iterations (P = 0.06). In terms of the ecological variables, dietary breadth was consistently  
 313 associated with ECV (P <0.001); however, home range size failed to reach significance (P =  
 314 0.11). Three of the life-history variables were significantly associated with ECV: gestation  
 315 length, maximum lifespan and weaning age (P <0.01).

316

317 Table 2. Phylogenetic generalised least-squares (PGLS) regression analyses examining the effects of social,  
 318 ecological and life-history variables\* on primate whole and regional brain volumes.

| <b>Brain input</b>        | <b>Preferred models</b>                   | <b>BIC score</b> | <b>Predictor</b> | <b>T</b> | <b>P</b>  |
|---------------------------|-------------------------------------------|------------------|------------------|----------|-----------|
| <b>Endocranial volume</b> | ECV ~ Mass + GS<br>+ DB + GL + ML +<br>WA | -208.5244        | Intercept        | -6.6214  | <0.001*** |
|                           |                                           |                  | LogMass          | 18.9909  | <0.001*** |
|                           |                                           |                  | GS               | 2.1248   | <0.05*    |
|                           |                                           |                  | DB               | 3.2392   | <0.01**   |
|                           |                                           |                  | LogGL            | 2.8949   | <0.01**   |
|                           |                                           |                  | LogML            | 3.0356   | <0.01**   |
|                           |                                           |                  | LogWA            | 3.3570   | <0.01**   |
|                           | ECV ~ Mass + SC<br>+ DB + GL + ML +<br>WA | <2               | Intercept        | -6.5280  | <0.001*** |
|                           |                                           |                  | LogMass          | 18.8287  | <0.001*** |
|                           |                                           |                  | SC               | 2.0765   | <0.05*    |
|                           |                                           |                  | DB               | 3.5498   | <0.001*** |
|                           |                                           |                  | LogGL            | 2.8406   | <0.01**   |
|                           |                                           |                  | LogML            | 2.7985   | <0.01**   |
|                           |                                           |                  | LogWA            | 3.2441   | <0.01**   |
|                           | Mass + SC + DB +<br>HR + GL + ML +<br>WA  | <2               | Intercept        | -6.6062  | <0.001*** |
|                           |                                           |                  | LogMass          | 17.6895  | <0.001*** |
|                           |                                           |                  | SC               | 1.9298   | 0.06      |
|                           |                                           |                  | DB               | 3.6480   | <0.001*** |
| LogHR                     |                                           |                  | 1.6222           | 0.11     |           |
| LogGL                     |                                           |                  | 3.0146           | <0.01**  |           |

|                   |                                 |           |           |         |           |
|-------------------|---------------------------------|-----------|-----------|---------|-----------|
|                   |                                 |           | LogML     | 2.7384  | <0.01**   |
|                   |                                 |           | LogWA     | 3.0851  | <0.01**   |
| <b>Neocortex</b>  | Neo ~ D + HR +<br>ML + WA       | -17.54041 | Intercept | 6.0124  | <0.001*** |
|                   |                                 |           | DFrug     | -2.1200 | <0.05*    |
|                   |                                 |           | DOmni     | -3.9187 | <0.001*** |
|                   |                                 |           | LogHR     | 3.2303  | <0.01**   |
|                   |                                 |           | LogML     | 4.4548  | <0.001*** |
|                   |                                 |           | LogWA     | 6.4547  | <0.001*** |
| <b>Cerebellum</b> | Cere ~ D + HR +<br>ML + WA      | -25.9437  | Intercept | 7.4158  | <0.001*** |
|                   |                                 |           | DFrug     | -1.5536 | 0.13      |
|                   |                                 |           | DOmni     | -3.0869 | <0.01**   |
|                   |                                 |           | LogHR     | 4.2338  | <0.001*** |
|                   |                                 |           | LogML     | 3.0810  | <0.01**   |
|                   |                                 |           | LogWA     | 5.8047  | <0.001*** |
|                   | Cere ~ D + HR +<br>GL + ML + WA | <2        | Intercept | 1.2227  | 0.23      |
|                   |                                 |           | DFrug     | -1.0319 | 0.31      |
|                   |                                 |           | DOmni     | -2.7180 | <0.01**   |
|                   |                                 |           | LogHR     | 4.4768  | <0.001*** |
|                   |                                 |           | LogGL     | 1.8597  | 0.07      |
|                   |                                 |           | LogML     | 2.4562  | <0.05*    |
|                   |                                 |           | LogWA     | 3.6953  | <0.001*** |

319 \*GS = Group size, SC = Social cohesion, D = Diet, DB = Dietary breadth, HV = Habitat variability, HR = Home  
320 range, GL = Gestation length, ML = Maximum longevity, F = Fertility, FR = Age at first reproduction, WA =  
321 Weaning age.

## 322 Regional brain volumes

323 The results of PGLS analysis on the neocortex and cerebellum data are presented in Table 1,  
324 with the '*best fit*' models presented in Table 2. The variables which were indicated to be of  
325 importance and included within the '*best fit*' neocortex model were: diet, home range size,  
326 maximum lifespan and weaning age. After accounting for phylogeny, diet, specifically  
327 frugivory and omnivory were found to be negatively associated with neocortex volume (P  
328 <0.05, P <0.001). This is the result produced when a folivorous diet is used as the baseline  
329 category, therefore the dietary category results produced here only demonstrates  
330 differences between these dietary groups (frugivory and omnivory) and folivory. Alongside  
331 these associations, home range size was positively correlated with neocortex volume (P



332 <0.01). Similar to whole brain models, both maximum lifespan and weaning age were  
333 significantly associated with neocortex volume ( $P < 0.001$ ).

334 The variables which were indicated to be of importance and included in the '*best fit*'  
335 cerebellum models were: diet, home range size, maximum lifespan and weaning age. Also  
336 present within the subset of '*best fit*' models was: gestation length. After accounting for  
337 phylogeny, diet, specifically omnivory was found to be negatively associated with  
338 cerebellum volume ( $P < 0.01$ ). Frugivory failed to be significant ( $P = 0.13$ ,  $P = 0.31$ ). As above,  
339 this results when folivorous diet is used as the baseline category. Home range size was  
340 positively associated with cerebellum volume ( $P < 0.001$ ). Similar to previous life-history  
341 results, maximum lifespan and weaning age were significantly associated with cerebellum  
342 volume ( $P < 0.01$ ,  $P < 0.001$ ). Gestation length was close to being significantly correlated with  
343 cerebellum volume ( $P = 0.07$ ).

344

## 345 **Carnivores**

346 The results of PGLS analysis on the carnivore data are presented Table 3. Almost all models  
347 were highly significant. Lambda was not consistent between the models, ranging from one  
348 to zero across the dataset. In terms of the '*best fit*' models, those producing the lowest BIC  
349 score (or any score within  $\text{dBIC} < 2$  of the lowest model), there was no significant difference  
350 between life history and combined models, and thus the results of all these models are  
351 discussed below. When comparing the influence of ecology versus sociality, ecological  
352 models were found to be preferable to social models when investigating regional brain  
353 volumes, evidenced by the presence of significantly improved BIC scores. However, this was

354 not the case in whole brain models, where there was no significant difference between the  
 355 preferred social and ecological models.

356

357 Table 3. Phylogenetic generalised least-squares (PGLS) regression analyses examining the effects of social,  
 358 ecological and life-history variables\* on carnivoran whole and regional brain volumes.

| Brain input               | Overall model       | Preferred model                                                 | BIC score        | P                |
|---------------------------|---------------------|-----------------------------------------------------------------|------------------|------------------|
| <b>Endocranial volume</b> | Social              | ECV ~ Mass + GS                                                 | -137.3671        | <0.001           |
|                           | Ecological          | ECV ~ Mass + HV                                                 | -138.8228        | <0.001           |
|                           | Social & Ecological | ECV ~ Mass + GS + HV                                            | -135.0748        | <0.001           |
|                           | <b>Life History</b> | <b>ECV ~ Mass + F</b>                                           | <b>-140.9778</b> | <b>&lt;0.001</b> |
|                           | Combined            | ECV ~ Mass + DB + F                                             | -140.4778        | <0.001           |
|                           | All                 | ECV ~ Mass + GS + SC + D + DB + HV + HR + GL + ML + F + FR + WA | -106.9128        | <0.001           |
| <b>Neocortex</b>          | Social              | Neo ~ GS                                                        | 71.58854         | 0.06425          |
|                           | Ecological          | Neo ~ HR                                                        | 68.10774         | <0.01            |
|                           | Social & Ecological | Neo ~ GS + HR                                                   | 70.20444         | <0.01            |
|                           | <b>Life History</b> | <b>Neo ~ FR</b>                                                 | <b>58.64386</b>  | <b>&lt;0.001</b> |
|                           | Combined            | Neo ~ HR + FR                                                   | 59.78632         | <0.001           |
|                           | All                 | Neo ~ GS + SC + D + DB + HV + HR + GL + ML + F + FR + WA        | 87.42208         | <0.001           |
| <b>Cerebellum</b>         | <b>Social</b>       | Cere ~ GS                                                       | 35.60386         | 0.07056          |
|                           | Ecological          | Cere ~ HR                                                       | 20.3267          | <0.001           |
|                           | Social & Ecological | Cere ~ GS + HR                                                  | 22.22221         | <0.001           |
|                           | Life History        | Cere ~ GL + ML + FR                                             | 4.668459         | <0.001           |
|                           | <b>Combined</b>     | <b>Cere ~ HR + GL + ML + FR</b>                                 | <b>3.803654</b>  | <b>&lt;0.001</b> |
|                           | All                 | Cere ~ GS + SC + D + DB + HV + HR + GL + ML + F + FR + WA       | 28.10051         | <0.001           |

359 \*GS = Group size, SC = Social cohesion, D = Diet, DB = Dietary breadth, HV = Habitat variability, HR = Home  
 360 range, GL = Gestation length, ML = Maximum longevity, F = Fertility, FR = Age at first reproduction, WA =  
 361 Weaning age.

### 362 Overall encephalisation

363 The results of PGLS analysis on endocranial volume data are presented in Table 3, with the  
 364 'best fit' models shown in Table 4. The variables which were indicated to be of importance

365 and included within the *'best fit'* endocranial volume models were: fertility, dietary breadth,  
 366 maximum longevity and age at first reproduction. After accounting for phylogeny, fertility  
 367 was found to be negatively associated with ECV ( $P < 0.05$ ), with this being the only variable  
 368 significantly associated with endocranial volume. For example, dietary breadth was close to  
 369 being negatively associated with ECV, but fell short of significance ( $P = 0.05$ ). In addition,  
 370 both maximum lifespan and age at first reproduction, failed to reach significance ( $P = 0.08$ ,  $P$   
 371  $= 0.10$ ).

372

373 Table 4. Phylogenetic generalised least-squares (PGLS) regression analyses examining the effects of social,  
 374 ecological and life-history variables\* on carnivoran whole and regional brain volumes.

| <b>Brain input</b>        | <b>Preferred models</b>  | <b>BIC score</b> | <b>Predictor</b> | <b>T</b>  | <b>P</b>  |
|---------------------------|--------------------------|------------------|------------------|-----------|-----------|
| <b>Endocranial volume</b> | ECV ~ Mass + F           | -140.9778        | Intercept        | -5.3678   | <0.001*** |
|                           |                          |                  | LogMass          | 25.7757   | <0.001*** |
|                           |                          |                  | LogF             | -2.0993   | <0.05*    |
|                           | ECV ~ Mass + DB + F      | <2               | Intercept        | -4.4263   | <0.001*** |
|                           |                          |                  | LogMass          | 25.6777   | <0.001*** |
|                           |                          |                  | DB               | -1.9622   | 0.05      |
|                           |                          |                  | LogF             | -2.4784   | <0.05*    |
|                           | ECV ~ Mass + ML          | <2               | Intercept        | -7.0336   | <0.001*** |
|                           |                          |                  | LogMass          | 24.0699   | <0.001*** |
|                           |                          |                  | LogML            | 1.7925    | 0.08      |
|                           | ECV ~ Mass + FR          | <2               | Intercept        | -6.0877   | <0.001*** |
|                           |                          |                  | LogMass          | 21.5774   | <0.001*** |
| LogFR                     |                          |                  | 1.6682           | 0.1       |           |
| <b>Neocortex</b>          | Neo ~ FR                 | 58.64386         | Intercept        | 35.4993   | <0.001*** |
|                           |                          |                  | LogFR            | 5.6022    | <0.001*** |
|                           | Neo ~ ML + FR            | <2               | Intercept        | 3.3575    | <0.01**   |
|                           |                          |                  | LogML            | 1.3334    | 0.19      |
|                           |                          |                  | LogFR            | 2.6229    | <0.05*    |
|                           | Neo ~ HR + FR            | <2               | Intercept        | 17.222    | <0.01**   |
| LogHR                     |                          |                  | 1.856            | 0.07      |           |
| LogFR                     |                          |                  | 3.786            | <0.001*** |           |
| <b>Cerebellum</b>         | Cere ~ HR + GL + ML + FR | 3.803654         | Intercept        | 1.8971    | 0.066599  |
|                           |                          |                  | LogHR            | 2.0374    | <0.05*    |

|                     |    |           |        |           |
|---------------------|----|-----------|--------|-----------|
|                     |    | LogGL     | 2.0974 | <0.05*    |
|                     |    | LogML     | 2.7665 | <0.01**   |
|                     |    | LogFR     | 2.1567 | <0.05*    |
| Cere ~ GL + ML + FR | <2 | Intercept | 2.0734 | <0.05*    |
|                     |    | LogGL     | 1.8730 | 0.07      |
|                     |    | LogML     | 2.8402 | <0.01**   |
|                     |    | LogFR     | 3.8113 | <0.001*** |
| Cere ~ ML + FR      | <2 | Intercept | 5.9931 | <0.001*** |
|                     |    | LogML     | 3.1178 | <0.01**   |
|                     |    | LogFR     | 4.9662 | <0.001*** |
| Cere ~ HR + ML + FR | <2 | Intercept | 5.9347 | <0.001*** |
|                     |    | LogHR     | 1.8137 | 0.08      |
|                     |    | LogML     | 3.0414 | <0.01**   |
|                     |    | LogFR     | 3.1242 | <0.01**   |
| Cere ~ ML + FR + WA | <2 | Intercept | 4.7991 | <0.001*** |
|                     |    | LogML     | 2.7130 | <0.05*    |
|                     |    | LogFR     | 4.4666 | <0.001*** |
|                     |    | LogWA     | 1.6954 | 0.1       |

375 \*GS = Group size, SC = Social cohesion, D = Diet, DB = Dietary breadth, HV = Habitat variability, HR = Home  
376 range, GL = Gestation length, ML = Maximum longevity, F = Fertility, FR = Age at first reproduction, WA =  
377 Weaning age.

378

### 379 **Regional brain volumes**

380 The results of PGLS analysis on the neocortex and cerebellum data are presented in Table 3,  
381 with the '*best fit*' models shown in Table 4. The variables which were indicated to be of  
382 importance and included in the '*best fit*' neocortex models were: age at first reproduction,  
383 maximum lifespan and home range size. After accounting for phylogeny, age at first  
384 reproduction was found to be positively associated with neocortex ( $P < 0.001$ ), with this  
385 being the only variable significantly associated with neocortex volume. For example, home  
386 range size was close to being positively associated with neocortex volume, but fell short of  
387 significance ( $P = 0.07$ ). In addition, maximum lifespan failed to reach significance ( $P = 0.19$ ).

388 The variables which were indicated to be of importance and included within the '*best fit*'  
389 cerebellum models were: home range size, gestation length, maximum lifespan and age at  
390 first reproduction. Also present within the subset of '*best fit*' models were: different  
391 iterations of the previously mentioned variables and weaning age. After accounting for  
392 phylogeny, home range size was found to be significantly associated with cerebellum  
393 volume ( $P < 0.05$ ). Three of the life-history variables were significantly associated with  
394 cerebellum volume: gestation length, maximum lifespan and age at first reproduction ( $P$   
395  $< 0.05$ ,  $P < 0.01$ ,  $P < 0.001$ ). Although, home range size and gestation length failed to reach  
396 significance in certain model iterations ( $P = 0.08$ ,  $P = 0.07$ ). Weaning age also failed to reach  
397 significance ( $P = 0.10$ ).

398

## 399 **Discussion**

400 Applying robust statistical analyses, a recently updated phylogenetic tree, a comprehensive  
401 dataset and models of varying complexity, the correlates of brain size in primates and  
402 carnivores were reconsidered. Consistent associations were found between brain size and  
403 ecological variables in primates, thus highlighting the influence of ecology on  
404 encephalisation. However, support was also found for the prominent social brain  
405 hypothesis, specifically revealing evidence for a link between whole brain volumes and two  
406 measures of sociality. In carnivores, data suggest ecological variables shape brain size,  
407 suggesting alternative evolutionary patterns influencing carnivoran encephalisation. In both  
408 groups, life history variables appear crucial in counterbalancing the costs of producing and  
409 maintaining increased brain size, through extended developmental periods, reduced fertility  
410 and increased maximum lifespan.

## 411 **Primates**

412 Here, consistent with current literature, robust correlations were found between brain size  
413 and ecological variables. The most prominent of these were diet related, with dietary  
414 categories or dietary breadth appearing in all '*best fit*' models, for both whole brain and  
415 regional brain data. These findings are similar to those of DeCasien et al., [20] and Powell et  
416 al. [14], who found stronger and more consistent associations with ecological variables than  
417 those related to the social environment. Akin to the result of DeCasien et al. [20], support  
418 was found for omnivory, as well as frugivory, as correlates of brain size. However, in  
419 contrast to the literature, here the correlations between regional brain volumes and dietary  
420 categories, were negatively correlated. This perhaps reflects both the need to sustain the  
421 energetic cost of brain tissue (highlighted by [115]; [116]), as well as meeting the cognitive  
422 foraging challenges imposed by omnivorous and frugivorous diets [3]. In addition to the  
423 dietary categories, dietary breadth was significantly (positively) correlated with whole brain  
424 volumes, further reinforcing the proposition that diet influences brain size, whilst  
425 highlighting how useful this proxy can be in understanding how availability and variety of  
426 food sources can be important in setting the cognitive challenge. For example, MacLean et  
427 al. [50] also suggested dietary breadth to be an important ecological correlate, with greater  
428 cognitive flexibility allowing individuals to explore and exploit new food sources, as well as  
429 deploy extractive foraging techniques. Evidence for associations between regional brain  
430 volumes and home range size were also found, supporting the view of Powell et al. [14] in  
431 that certain dietary categories, such as frugivory, may covary with home range. Similar  
432 results were also found by Graber et al. [117].

433 In the past considerable support indicated that sociality was the major driver of  
434 encephalisation in primates. More recent works, however, contest this long-held viewpoint,  
435 failing to find support for a link between brain size and sociality measures [14, 19, 20, 50,  
436 51]. Our findings, however, confirm support for the social brain hypothesis. Here, our  
437 models revealed evidence of a link between brain size and sociality in primates. This  
438 association was present only in the whole brain '*best fit*' models, with both variables  
439 reaching significance, indicating both increasing social group size and varying levels of social  
440 cohesion are influencing brain size in primates. Interestingly, use of the social cohesion  
441 proxy was often preferred when comparing models, thereby suggesting the use of this proxy  
442 is superior when testing multiple ecological and social variables simultaneously. The  
443 inference too is that there may be greater importance in relationship quality, over quantity,  
444 as suggested by past research into primate sociality and pair-bonds [34, 45, 49, 95, 118]. It is  
445 important to note however, that whilst there was support for this hypothesis, ecological  
446 models were preferable over social ones and ecological variables appear to be more robust  
447 correlates of brain size when compared to measures of sociality (see [117]).

448 Consistent with the literature, support was found for correlations between life-history  
449 variables and brain size. As suggested within the developmental cost [110] and maternal  
450 energy [119] hypotheses, relationships found possibly reflect the developmental costs  
451 associated with growing large brains, which appear to be bypassed through extended  
452 developmental periods and increased maternal investment [120, 121]. Similarly, Powell et  
453 al. [105] found correlations between neocortex volume and gestation length, as well as  
454 cerebellum volume and juvenile period. Whilst the associations found here differ in terms of  
455 the specific regions involved, this supports the theory as to why relatively large-brained  
456 mammals often exhibit slow maturation times and reduced fertility; thus, by increasing

457 developmental periods and maternal investment, primates possess these slow life histories  
458 which ultimately facilitates the production of big brains. This therefore makes the 'extended  
459 parenting' association critical to the evolution of cognition [90, 120, 122, 123]. However,  
460 one mystery still left to solve is the reasoning behind the association found here between  
461 brain size and maximum longevity. One proposition is that selection mechanisms work  
462 towards counterbalancing the costs of large brains in mammals with a longer reproductive  
463 lifespan [124], and thus, by extending the reproductive lifespan of a species, it counteracts  
464 the time and effort spent producing and maintaining large brains and aims to maximise the  
465 time species can spend producing young, which in turn have large brains. Whereas others  
466 propose the correlation is indirect and that a longer reproductive lifespan is a by-product of  
467 shifting developmental and maturation periods [105].

## 468 **Carnivores**

469 Akin to the primate results, for carnivores, support is found for a link between regional brain  
470 volumes and home range size. This relationship reached significance in the cerebellum  
471 models, concurring with research suggesting this region is important for spatial memory  
472 processing [1, 125, 126]. Simply, larger home range sizes are thought to require the use of  
473 complex information about food location and distribution [9], which for example in  
474 carnivores, may represent the challenges of locating travelling herds of herbivores.  
475 Alongside this association, indicating spatial demands influence brain size in carnivores,  
476 dietary breadth was another ecological variable included in the '*best fit*' endocranial volume  
477 models. However, in contrast to the results of MacLean et al. [50] and Swanson et al. [19],  
478 the relationship between dietary breadth and brain size is negatively directed, suggesting  
479 greater dietary breadth is actually associated with smaller brain size in carnivores. This



480 result could perhaps be a consequence of those species who are classified as obligate meat  
481 eaters, whose dietary breath is limited to one or two categories, thereby producing this  
482 negative correlation. Despite this, obligate meat-eating carnivores consume the highest  
483 caloric diet, which is thought to provide greater energy for producing large brains. This  
484 highlights how carnivores cannot simply be compared and likened to other mammalian  
485 orders, such as Primates, and suggests different evolutionary mechanisms at work in  
486 carnivoran lineages. It is important to note, however, that this association, whilst close to,  
487 failed to reach significance ( $P = 0.05$ ), suggesting this relationship is not a strong influence  
488 on brain size in carnivores.

489 Whilst previous work has suggested sociality plays a role in the evolution of brain size in  
490 carnivoran lineages [31, 33-35], here, we find no support for a link between measures of  
491 sociality and brain size in carnivores. Similarly, MacLean et al. [50], Benson-Amram et al.  
492 [127], and Swanson et al. [19], found no support for the social brain hypothesis in mammals.  
493 The contrasting results present in the literature could be due to the fact that sociality  
494 appears to be limited to a select few carnivore taxa, specifically social species from the  
495 families Hyaenidae, Procyonidae and Felidae [128]. This is suggested in the findings of  
496 Finarelli & Flynn [55], who identified that support for the SBH in Carnivora was dependent  
497 on data from Canidae, without which, no association is found. Thus, whilst sociality  
498 evidently plays an important role in primates, leading to complex, multi-faceted societies,  
499 this is less common in carnivore species, and therefore does not hold the same importance.  
500 Consistent with the previously discussed primate results, associations were found between  
501 life-history variables and brain size in carnivores. Age at first reproduction, gestation length  
502 and maximum lifespan were all found to positively correlate with regional brain volumes,

503 suggesting both an increase in developmental periods as well as an extension in  
504 reproductive lifespans. Additionally, findings are consistent with the expensive brain  
505 hypothesis [121], which proposes either an increase in energy turnover or a reduction in  
506 energy allocation is needed in order to meet the costs of increased brain size. This is seen  
507 here with a negative correlation between fertility and endocranial volume, suggesting a  
508 reduction in reproductive output. This, when paired with an increase in maternal  
509 investment and developmental periods, as suggested by the aforementioned results,  
510 bypasses the developmental constraints of producing a large brain through reduced fertility  
511 and slow maturation times.

## 512 **Whole versus regional brain volumes**

513 Our study highlights the benefit of investigating both whole brain and regional brain  
514 volumes. Whole brain volumes are often more readily available for species and thus by  
515 choosing to use this brain measure it increases sample sizes and commensurate statistical  
516 power. In addition, it has been argued the neocortex comprises a large proportion of whole  
517 brain volume, making the two brain volumes closely related [34, 95]. However, it is possible  
518 the inclusion of specific brain regions may uncover further associations that were not  
519 significant or present before. This was the case here, where for primates, the home range  
520 association only became significant in the neocortex and cerebellum models, having not  
521 reached significance in endocranial volume models. Additionally, in carnivores, many of the  
522 life-history associations, for example age at first reproduction, only reached significance in  
523 the regional brain volume models. Therefore, without investigating specific brain regions,  
524 the influence of these associations would have been missed. In addition to this, the use of  
525 whole brain size does not necessarily allow the study of the ways in which different selective

526 pressures act on different neural systems, as proposed by theories of mosaic evolution [5,  
527 61]. This often makes it difficult to relate whole brain size to individual selection pressures  
528 [129]. By investigating specific brain regions, where brain data and the corresponding  
529 covariates are available, it allows the further analysis of how multiple functional systems can  
530 evolve in a mosaic fashion in response to different selection pressures.

## 531 **Conclusion**

532 To conclude, the evidence presented here supports the proposition that ecological variables  
533 hold greater influence in determining brain size in primate lineages. However, critical  
534 support is also found for the SBH in primates, confirming sociality does hold significance in  
535 encephalisation. Ecological variables, most notably home range size, appear to shape  
536 carnivoran brain size. Yet no support is found there for measures of sociality, indicating that  
537 sociality may not hold the same importance within that order. Life-history traits reveal  
538 evidence for the transition to slow life histories, which work toward facilitating the  
539 production of big brains and bypassing the cost of expensive brain tissue. Whilst data  
540 availability limits the application of comparative studies of brain evolution in many species,  
541 future studies should strive to integrate multiple variables, fully encompassing all the  
542 potential variables influencing brain size. In addition, where possible, researchers should  
543 investigate both whole brain and specific brain regions, as the inclusion of such may reveal  
544 further associations, capturing how different brain regions can evolve independently  
545 through varying selection pressures.

546

## 547 **Acknowledgements**

548 We thank Alex DeCasien for help regarding encephalisation quotients and model  
549 comparison analyses. We are grateful to Eli Swanson for valuable discussions regarding  
550 PGLS analysis and for providing additional data analysis resources. Our thanks also to F.  
551 Sayol, O. Bertrand, V. Weisbecker, N. Emery, M. Tucker, D. Hinchcliffe, M. Olalla-Tárraga, S.  
552 Shultz, J. Gundry, C. O'Hara and C. Fauvelle. We are further grateful to the reviewers, whose  
553 thorough examinations led to a range of helpful suggestions that greatly assisted us in  
554 improving our ms.

555

556 **Data Accessibility:** All data supporting the findings of this study are available in the paper  
557 and the supplementary information.

558

559 **Author Contributions:** conceptualisation and methodology, HRC and SOH; investigation and  
560 data curation, HRC; formal analysis, HRC, SAH; supervision, SOH; project administration,  
561 HRC; visualisation and original draft, HRC, SOH; review and editing, HRC, SOH, SAH.

562

563 **Funding:** This research received no external funding

564 **Conflict of interest:** Authors declare no competing interests

565

## 566 **References**

567 1. Barton RA. Embodied cognitive evolution and the cerebellum. *Philos Trans R Soc B.*  
568 2012;367(1599): 2097-2107.

- 569 2. Parker ST, Gibson KR. Object manipulation, tool use and sensorimotor intelligence as  
570 feeding adaptations in cebus monkeys and great apes. *J Hum Evol.* 1977;6(7): 623-641.
- 571 3. Milton K. Distribution patterns of tropical plant foods as an evolutionary stimulus to  
572 primate mental development. *Am Anthropol.* 1981;83(3): 534-548.
- 573 4. Mace GM, Harvey PH, Clutton-Brock TH. Brain size and ecology in small mammals. *J*  
574 *Zool.* 1981;193(3): 333-354.
- 575 5. Barton RA, Purvis A, Harvey PH. Evolutionary radiation of visual and olfactory brain  
576 systems in primates, bats and insectivores. *Philos Trans R Soc B.* 1995;348(1326): 381-392.
- 577 6. Hutcheon JM, Kirsch JAW, Garland Jr T. A comparative analysis of brain size in  
578 relation to foraging ecology and phylogeny in the chiroptera. *Brain Behav Evol.* 2002;60(3):  
579 165-180.
- 580 7. Winkler H, Leisler B, Bernroider G. Ecological constraints on the evolution of avian  
581 brains. *J Ornithol.* 2004;145(3): 238-244.
- 582 8. Harvey PH, Clutton-Brock TH, Mace GM. Brain size and ecology in small mammals  
583 and primates. *PNAS.* 1980;77(7): 4387-4389.
- 584 9. Clutton-Brock TH, Harvey PH. Primates, brains and ecology. *J Zool.* 1980;190(3): 309-  
585 323.
- 586 10. Bernard RTF, Nurton J. Ecological correlates of relative brain size in some south  
587 african rodents. *S Afr J Zool.* 1993;28(2): 95-98.
- 588 11. Barton RA. Primate brain evolution: cognitive demands of foraging or of social life?  
589 In: Boinski S, Garber PA, editors. *On the move: how and why animals travel in groups.*  
590 London: The University of Chicago Press; 2000. pp. 204-237.
- 591 12. Heldstab SA, Kosonen ZK, Koski SE, Burkart JM, van Schaik CP, Isler K. Manipulation  
592 complexity in primates coevolved with brain size and terrestriality. *Sci Rep.* 2016;6: 24528.

- 593 13. Parker ST. Re-evaluating the extractive foraging hypothesis. *New Ideas Psychol.*  
594 2015;37: 1-12.
- 595 14. Powell LE, Isler K, Barton RA. Re-evaluating the link between brain size and  
596 behavioural ecology in primates. *Proc R Soc B.* 2017;284(1865): 20171765.
- 597 15. Milton K, May ML. Body weight, diet and home range area in primates. *Nature.*  
598 1976;259(5543): 459-462.
- 599 16. Walker R, Burger O, Wagner J, Von Rueden CR. Evolution of brain size and juvenile  
600 periods in primates. *J Hum Evol.* 2006;51(5): 480-489.
- 601 17. Ratcliffe JM. Neuroecology and diet selection in phyllostomid bats. *Behav Process.*  
602 2009;80(3): 247-251.
- 603 18. van Woerden JT, van Schaik CP, Isler K. Effects of seasonality on brain size evolution:  
604 evidence from strepsirrhine primates. *Am Nat.* 2010;176(6): 758-767.
- 605 19. Swanson EM, Holekamp KE, Lundrigan BL, Arsznov BM, Sakai ST. Multiple  
606 determinants of whole and regional brain volume among terrestrial carnivorans. *PLoS One.*  
607 2012;7(6): e38447.
- 608 20. DeCasien AR, Williams SA, Higham JP. Primate brain size is predicted by diet but not  
609 sociality. *Nat Ecol Evol.* 2017;1(5): 0112.
- 610 21. Gibson KR. Cognition, brain size and the extraction of embedded food resources. In:  
611 Lee PC, Else JG, editors. *Primate ontogeny, cognition and social behaviour.* Cambridge:  
612 Cambridge University Press; 1986. pp. 93-103.
- 613 22. Reader SM, Hager Y, Laland KN. The evolution of primate general and cultural  
614 intelligence. *Philos Trans R Soc B.* 2011;366(1567): 1017-1027.

- 615 23. Plante S, Colchero F, Calmé S. Foraging strategy of a neotropical primate: how  
616 intrinsic and extrinsic factors influence destination and residence time. *J Anim Ecol.*  
617 2014;83(1): 116-125.
- 618 24. Sol D, Duncan R, Blackburn T, Cassey P, Lefebvre L. Big brains, enhanced cognition,  
619 and response of birds to novel environments. *PNAS.* 2005;102: 5460-5465.
- 620 25. Whiten A, Byrne RW. Tactical deception in primates. *Behav Brain Sci.* 1988;11(2):  
621 233-273.
- 622 26. Dunbar RIM. The social brain hypothesis. *Evol Anthropol.* 1998;6(5): 178-190.
- 623 27. Dunbar RIM. The social brain hypothesis and its implications for social evolution. *Ann*  
624 *Hum Biol.* 2009;36(5): 562-572.
- 625 28. Dunbar RIM. Neocortex size as a constraint on group size in primates. *J Hum Evol.*  
626 1992;22(6): 469-493.
- 627 29. Byrne RW, Corp N. Neocortex size predicts deception rate in primates. *Proc R Soc B.*  
628 2004;271(1549): 1693-1699.
- 629 30. Kudo H, Dunbar RIM. Neocortex size and social network size in primates. *Anim*  
630 *Behav.* 2001;62(4): 711-722.
- 631 31. Holekamp KE, Dantzer B, Stricker G, Shaw Yoshida KC, Benson-Amram S. Brains,  
632 brawn and sociality: a hyaena's tale. *Anim Behav.* 2015;103: 237-248.
- 633 32. Sakai ST, Arsznov BM, Lundrigan BL, Holekamp KE. Brain size and social complexity: a  
634 computed tomography study in hyaenidae. *Brain Behav Evol.* 2011;77(2): 91-104.
- 635 33. Dunbar RIM, Bever J. Neocortex size predicts group size in carnivores and some  
636 insectivores. *Ethology.* 1998;104(8): 695-708.
- 637 34. Shultz S, Dunbar RIM. The evolution of the social brain: anthropoid primates contrast  
638 with other vertebrates. *Proc R Soc B.* 2007;274(1624): 2429-2436.

- 639 35. Pérez-Barbería FJ, Shultz S, Dunbar RIM. Evidence for coevolution of sociality and  
640 relative brain size in three orders of mammals. *Evolution*. 2007;61(12): 2811-2821.
- 641 36. Perez-Barberia FJ, Gordon IJ. Gregariousness increases brain size in ungulates.  
642 *Oecologia*. 2005;145(1): 41-52.
- 643 37. Shultz S, Dunbar RIM. Both social and ecological factors predict ungulate brain size.  
644 *Proc R Soc B*. 2006;273(1583): 207-215.
- 645 38. Emery N, Seed A, von Bayern A, Clayton N. Cognitive adaptations of social bonding in  
646 birds. *Philos Trans R Soc B*. 2007;362: 489-505.
- 647 39. Scheiber IB, Weiß BM, Hirschenhauser K, Wascher CA, Nedelcu IT, Kotrschal K. Does  
648 'relationship intelligence' make big brains in birds? *Open Biol*. 2008;1: 6-8.
- 649 40. Shultz S, Dunbar RIM. Social bonds in birds are associated with brain size and  
650 contingent on the correlated evolution of life-history and increased parental investment.  
651 *Biol J Linn Soc*. 2010;100(1): 111-123.
- 652 41. Gonzalez-Voyer A, Winberg S, Kolm N. Social fishes and single mothers: brain  
653 evolution in african cichlids. *Proc R Soc B*. 2009;276(1654): 161-167.
- 654 42. Bshary R. Machiavellian intelligence in fishes. In: Brown C, Laland KN, Krause J,  
655 editors. *Fish cognition and behavior*. Chichester: Blackwell Publishing Ltd; 2011. pp. 277-  
656 297.
- 657 43. Triki Z, Levorato E, McNeely W, Marshall J, Bshary R. Population densities predict  
658 forebrain size variation in the cleaner fish *Labroides dimidiatus*. *Proc R Soc B*.  
659 2019;286(1915): 20192108.
- 660 44. Byrne RW, Bates LA. Brain evolution: when is a group not a group? *Curr Biol*.  
661 2007;17(20): R883-R884.



- 662 45. Bergman TJ, Beehner JC. Measuring social complexity. *Anim Behav.* 2015;103: 203-  
663 209.
- 664 46. Schillaci MA. Sexual selection and the evolution of brain size in primates. *PLoS One.*  
665 2006;1(1): e62.
- 666 47. Schillaci MA. Primate mating systems and the evolution of neocortex size. *J Mammal.*  
667 2008;89(1): 58-63.
- 668 48. MacLean EL, Barrickman NL, Johnson EM, Wall CE. Sociality, ecology, and relative  
669 brain size in lemurs. *J Hum Evol.* 2009;56(5): 471-478.
- 670 49. Silk JB. The evolution of primate societies. In: Mitani JC, Call J, Kappeler PM, Palombit  
671 RA, Silk JB, editors. *The adaptive value of sociality: University of Chicago Press; 2012.* pp.  
672 552-564.
- 673 50. MacLean EL, Hare B, Nunn CL, Addessi E, Amici F, Anderson RC, et al. The evolution  
674 of self-control. *PNAS.* 2014;111(20): E2140-2148.
- 675 51. van Schaik C, Graber SM, Schuppli C, Heldstab SA, Isler K. Brain size evolution in  
676 primates-testing effects of social vs. ecological complexity. *Am J Phys Anthropol.* 2016;159:  
677 321-321.
- 678 52. Holekamp KE, Benson-Amram S. The evolution of intelligence in mammalian  
679 carnivores. *Interface Focus.* 2017;7(3): 20160108.
- 680 53. Holekamp KE. Questioning the social intelligence hypothesis. *Trends Cogn Sci.*  
681 2007;11(2): 65-69.
- 682 54. van Schaik CP, Isler K, Burkart JM. Explaining brain size variation: from social to  
683 cultural brain. *Trends Cogn Sci.* 2012;16(5): 277-284.
- 684 55. Finarelli JA, Flynn JJ. Brain-size evolution and sociality in carnivora. *PNAS.*  
685 2009;106(23): 9345-9349.

- 686 56. Jerison HJ. Evolution of the brain and intelligence. New York: Academic Press; 1973.
- 687 57. Deaner RO, Isler K, Burkart J, van Schaik C. Overall brain size, and not encephalization  
688 quotient, best predicts cognitive ability across non-human primates. *Brain Behav Evol.*  
689 2007;70(2): 115-124.
- 690 58. Shultz S, Dunbar R. Encephalization is not a universal macroevolutionary  
691 phenomenon in mammals but is associated with sociality. *PNAS.* 2010;107(50): 21582-  
692 21586.
- 693 59. Freckleton RP. On the misuse of residuals in ecology: regression of residuals vs.  
694 multiple regression. *J Anim Ecol.* 2002;71(3): 542-545.
- 695 60. Freckleton RP. The seven deadly sins of comparative analysis. *J Evol Biol.* 2009;22(7):  
696 1367-1375.
- 697 61. Barton RA, Harvey PH. Mosaic evolution of brain structure in mammals. *Nature.*  
698 2000;405(6790): 1055-1058.
- 699 62. Deaner RO, Nunn CL. How quickly do brains catch up with bodies? A comparative  
700 method for detecting evolutionary lag. *Proc R Soc B.* 1999;266(1420): 687-694.
- 701 63. Smaers JB, Dechmann DKN, Goswami A, Soligo C, Safi K. Comparative analyses of  
702 evolutionary rates reveal different pathways to encephalization in bats, carnivorans, and  
703 primates. *PNAS.* 2012;109(44): 18006-18011.
- 704 64. Smaers JB, Rothman RS, Hudson DR, Balanoff AM, Beatty B, Dechmann DKN, et al.  
705 The evolution of mammalian brain size. *Sci Adv.* 2021;7(18): eabe2101.
- 706 65. van Schaik CP, Triki Z, Bshary R, Heldstab SA. A farewell to EQ: A new brain size  
707 measure for comparative primate cognition. *bioRxiv.* 2021: 2021.2002.2015.431238.
- 708 66. Finlay B, Darlington RB. Linked regularities in the development and evolution of  
709 mammalian brains. *Science.* 1995;268: 1578-1584.

- 710 67. Finlay BL, Darlington RB, Nicastro N. Developmental structure in brain evolution.  
711 Behav Brain Sci. 2001;24(2): 263-278.
- 712 68. Cantania K. Correlates and possible mechanisms of neocortical enlargement and  
713 diversification in mammals. Int J Comp Psychol. 2004;17(1).
- 714 69. Innocenti GM, Kaas JH. The cortex. Trends Neurosci. 1995;18(9): 371-372.
- 715 70. Kaas JH. The evolution of isocortex. Brain Behav Evol. 1995;46(4-5): 187-196.
- 716 71. Barton RA. Visual specialization and brain evolution in primates. Proc R Soc B.  
717 1998;265(1409): 1933-1937.
- 718 72. Jacobs GH. The distribution and nature of colour vision among the mammals. Biol  
719 Rev. 1993;68(3): 413-471.
- 720 73. Jacobs GH. Variations in primate color vision: mechanisms and utility. Evol  
721 Anthropol. 1994;3(6): 196-205.
- 722 74. Jacobs GH. Primate photopigments and primate color vision. PNAS. 1996;93(2): 577-  
723 581.
- 724 75. Sussman RW. Primate origins and the evolution of angiosperms. Am J Primatol.  
725 1991;23(4): 209-223.
- 726 76. Brothers L. The neural basis of primate social communication. Motiv Emot.  
727 1990;14(2): 81-91.
- 728 77. Barton RA. Neocortex size and behavioural ecology in primates. Proc R Soc B.  
729 1996;263(1367): 173-177.
- 730 78. Barton RA. Binocularity and brain evolution in primates. PNAS. 2004;101(27): 10113-  
731 10115.
- 732 79. Barton RA. Olfactory evolution and behavioral ecology in primates. Am J Primatol.  
733 2006;68(6): 545-558.

- 734 80. Whiting BA, Barton RA. The evolution of the cortico-cerebellar complex in primates:  
735 anatomical connections predict patterns of correlated evolution. *J Hum Evol.* 2003;44(1): 3-  
736 10.
- 737 81. Butler AB, Hodos W. *Comparative vertebrate neuroanatomy: evolution and*  
738 *adaptation.* 2nd ed. New Jersey: John Wiley & Sons Inc; 2005.
- 739 82. Iwaniuk AN, Lefebvre L, Wylie DR. The comparative approach and brain-behaviour  
740 relationships: a tool for understanding tool use. *Can J Exp Psychol.* 2009;63(2): 150-159.
- 741 83. Obayashi S, Suhara T, Kawabe K, Okauchi T, Maeda J, Akine Y, et al. Functional brain  
742 mapping of monkey tool use. *NeuroImage.* 2001;14(4): 853-861.
- 743 84. Barton RA, Venditti C. Rapid evolution of the cerebellum in humans and other great  
744 apes. *Curr Biol.* 2014;24(20): 2440-2444.
- 745 85. Wolpert DM, Doya K, Kawato M. A unifying computational framework for motor  
746 control and social interaction. *Philos Trans R Soc B.* 2003;358(1431): 593-602.
- 747 86. Oztop E, Wolpert D, Kawato M. Mental state inference using visual control  
748 parameters. *Cogn Brain Res.* 2005;22(2): 129-151.
- 749 87. Smaers JB, Vanier DR. Brain size expansion in primates and humans is explained by a  
750 selective modular expansion of the cortico-cerebellar system. *Cortex.* 2019;118: 292-305.
- 751 88. Smaers JB, Turner AH, Gómez-Robles A, Sherwood CC. A cerebellar substrate for  
752 cognition evolved multiple times independently in mammals. *eLife.* 2018;7: e35696.
- 753 89. Fernandes HBF, Peñaherrera-Aguirre M, Woodley of Menie MA, Figueredo AJ.  
754 Macroevolutionary patterns and selection modes for general intelligence (G) and for  
755 commonly used neuroanatomical volume measures in primates. *Intelligence.* 2020;80:  
756 101456.

- 757 90. Isler K, van Schaik CP. Allomaternal care, life history and brain size evolution in  
758 mammals. *J Hum Evol.* 2012;63(1): 52-63.
- 759 91. DeCasien AR, Higham JP. Primate mosaic brain evolution reflects selection on  
760 sensory and cognitive specialization. *Nat Ecol Evol.* 2019;3(10): 1483-1493.
- 761 92. Sakai ST, Arsznov BM, Hristova AE, Yoon EJ, Lundrigan BL. Big cat coalitions: a  
762 comparative analysis of regional brain volumes in felidae. *Front Neuroanat.* 2016;10: 99.
- 763 93. Heldstab S, Isler K. Environmental seasonality and mammalian brain size evolution:  
764 Wiley Online Library; 2019.
- 765 94. Dunbar RIM, Shultz S. Understanding primate brain evolution. *Philos Trans R Soc B.*  
766 2007;362(1480): 649-658.
- 767 95. Dunbar RIM, Shultz S. Why are there so many explanations for primate brain  
768 evolution? *Philos Trans R Soc B.* 2017;372(1727): 20160244.
- 769 96. Isler K, Christopher Kirk E, Miller JM, Albrecht GA, Gelvin BR, Martin RD. Endocranial  
770 volumes of primate species: scaling analyses using a comprehensive and reliable data set. *J*  
771 *Hum Evol.* 2008;55(6): 967-978.
- 772 97. Stephan H, Frahm H, Baron G. New and revised data on volumes of brain structures  
773 in insectivores and primates. *Folia Primatol.* 1981;35(1): 1-29.
- 774 98. Sallet J, Mars RB, Noonan MP, Andersson JL, O'Reilly JX, Jbabdi S, et al. Social  
775 network size affects neural circuits in macaques. *Science.* 2011;334(6056): 697-700.
- 776 99. Powell J, Lewis PA, Roberts N, García-Fiñana M, Dunbar RIM. Orbital prefrontal  
777 cortex volume predicts social network size: an imaging study of individual differences in  
778 humans. *Proc R Soc B.* 2012;279(1736): 2157-2162.
- 779 100. Dunbar RIM, Shultz S. Evolution in the social brain. *Science.* 2007;317(5843): 1344-  
780 1347.

- 781 101. Stankowich T, Haverkamp PJ, Caro T. Ecological drivers of antipredator defenses in  
782 carnivores. *Evolution*. 2014;68(5): 1415-1425.
- 783 102. Wilman H, Belmaker J, Simpson J, de la Rosa C, Rivadeneira MM, Jetz W. EltonTraits  
784 1.0: Species-level foraging attributes of the world's birds and mammals. *Ecology*. 2014;95(7):  
785 2027-2027.
- 786 103. IUCN. The IUCN red list of threatened species [Internet]. United Kingdom:  
787 International Union for Conservation of Nature and Natural Resources; 2021 [updated 2021,  
788 cited Jul 2, 2020]. Available from: <https://www.iucnredlist.org/>.
- 789 104. Deaner RO, Barton RA, van Schaik C. Primate brains and life histories: renewing the  
790 connection. In: Kappeler PM, Pereira ME, editors. *Primate life histories and socioecology*.  
791 Chicago: The University of Chicago Press; 2003. pp. 233-265.
- 792 105. Powell LE, Barton RA, Street SE. Maternal investment, life histories and the evolution  
793 of brain structure in primates. *Proc R Soc B*. 2019;286(1911): 20191608.
- 794 106. Isler K, Van Schaik CP. How humans evolved large brains: comparative evidence. *Evol*  
795 *Anthropol*. 2014;23(2): 65-75.
- 796 107. Weisbecker V, Goswami A. Brain size, life history, and metabolism at the  
797 marsupial/placental dichotomy. *PNAS*. 2010;107(37): 16216-16221.
- 798 108. DeCasien AR, Thompson NA, Williams SA, Shattuck MR. Encephalization and  
799 longevity evolved in a correlated fashion in euarchontoglires but not in other mammals.  
800 *Evolution*. 2018;72(12): 2617-2631.
- 801 109. Street SE, Navarrete AF, Reader SM, Laland KN. Coevolution of cultural intelligence,  
802 extended life history, sociality, and brain size in primates. *PNAS*. 2017;114(30): 7908-7914.
- 803 110. Barton RA, Capellini I. Maternal investment, life histories, and the costs of brain  
804 growth in mammals. *PNAS*. 2011;108(15): 6169-6174.

- 805 111. Barrickman NL, Bastian ML, Isler K, van Schaik CP. Life history costs and benefits of  
806 encephalization: a comparative test using data from long-term studies of primates in the  
807 wild. *J Hum Evol.* 2008;54(5): 568-590.
- 808 112. Symonds MRE, Blomberg SP. A primer on phylogenetic generalised least squares. In:  
809 Garamszegi LZ, editor. *Modern phylogenetic comparative methods and their application in*  
810 *evolutionary biology: concepts and practice.* Berlin, Heidelberg: Springer Berlin Heidelberg;  
811 2014. pp. 105-130.
- 812 113. Upham NS, Esselstyn JA, Jetz W. Inferring the mammal tree: species-level sets of  
813 phylogenies for questions in ecology, evolution, and conservation. *PLoS Biol.* 2019;17(12):  
814 e3000494.
- 815 114. Schwarz G. Estimating the dimension of a model. *Ann Stat.* 1978;6(2): 461-464, 464.
- 816 115. Aiello LC, Wheeler P. The expensive-tissue hypothesis: the brain and the digestive  
817 system in human and primate evolution. *Curr Anthropol.* 1995;36(2): 199-221.
- 818 116. Fish JL, Lockwood CA. Dietary constraints on encephalization in primates. *Am J Phys*  
819 *Anthropol.* 2003;120(2): 171-181.
- 820 117. Graber SM. *Social and ecological aspects of brain size evolution: a comparative*  
821 *approach [PhD Thesis].* Zurich: University of Zurich; 2017.
- 822 118. Layton R, O'Hara S. Human social evolution: a comparison of hunter gather and  
823 chimpanzee social organization. In: Dunbar R, Gamble C, Gowlett J, editors. *Social brain,*  
824 *distributed mind.* Oxford: British Academy; 2010. pp. 85-115.
- 825 119. Martin RD. Scaling of the mammalian brain: the maternal energy hypothesis.  
826 *Physiology.* 1996;11(4): 149-156.
- 827 120. Heldstab SA, Isler K, Burkart JM, van Schaik CP. Allomaternal care, brains and fertility  
828 in mammals: who cares matters. *Behav Ecol Sociobio.* 2019;73(6): 71.

- 829 121. Isler K, van Schaik CP. The expensive brain: a framework for explaining evolutionary  
830 changes in brain size. *J Hum Evol.* 2009;57(4): 392-400.
- 831 122. Heldstab SA, Isler K, Schuppli C, van Schaik CP. When ontogeny recapitulates  
832 phylogeny: Fixed neurodevelopmental sequence of manipulative skills among primates. *Sci*  
833 *Adv.* 2020;6(30): eabb4685.
- 834 123. Uomini N, Fairlie J, Gray RD, Griesser M. Extended parenting and the evolution of  
835 cognition. *Philos Trans R Soc B.* 2020;375(1803): 20190495.
- 836 124. González-Lagos C, Sol D, Reader S. Large-brained mammals live longer. *J Evol Biol.*  
837 2010;23: 1064-1074.
- 838 125. Leggio MG, Chiricozzi FR, Clausi S, Tedesco AM, Molinari M. The neuropsychological  
839 profile of cerebellar damage: the sequencing hypothesis. *Cortex.* 2011;47(1): 137-144.
- 840 126. Rochefort C, Arabo A, André M, Poucet B, Save E, Rondi-Reig L. Cerebellum shapes  
841 hippocampal spatial code. *Science.* 2011;334(6054): 385-389.
- 842 127. Benson-Amram S, Dantzer B, Stricker G, Swanson EM, Holekamp KE. Brain size  
843 predicts problem-solving ability in mammalian carnivores. *PNAS.* 2016;113(9): 2532-2537.
- 844 128. Sakai ST, Arsznov BM. Carnivoran brains: effects of sociality on inter- and  
845 intraspecific comparisons of regional brain volumes. In: Kaas JH, editor. *Evolutionary*  
846 *neuroscience.* 2nd ed. London: Academic Press; 2020. pp. 463-479.
- 847 129. Healy SD, Rowe C. A critique of comparative studies of brain size. *Proc R Soc B.*  
848 2007;274(1609): 453-464.

849



## 850 **Supporting information**

851 **S1 File. Supplementary analyses.** This document includes information about the extra  
852 analyses conducted using different measures of brain size.

853 **S2 File. Supplementary results tables.** This document includes all the supplementary results  
854 tables associated with the supplementary analyses.

855 **S3 File. Supplementary BIC scores.** This excel file includes all the BIC scores used to conduct  
856 model comparisons during the main analyses.

857 **S4 File. Additional BIC scores.** This excel file includes all the BIC scores used to conduct  
858 model comparisons during the extra analyses.

859 **S5 File. Supporting data.** This excel file includes all the data used within the statistical  
860 analyses.

861 **S6 File. VIF results.** This document includes all the VIF score results.

862 **S7 File. Data collection sources.** This document includes all the data collection sources.

863 **S8 File. R code.** This text file contains the R script used to conduct the statistical analyses.

864 **S9 File. Phylogenetic tree.** This file is the phylogenetic tree used during statistical analyses.

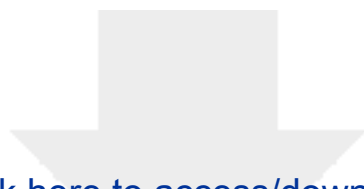

Click here to access/download

**Supporting Information**

S1 File\_Supplementary analyses.docx

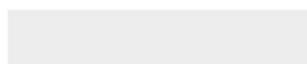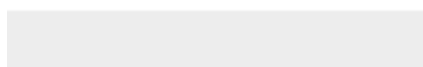



[Click here to access/download](#)

**Supporting Information**

S2 File\_Supplementary results tables.docx

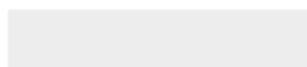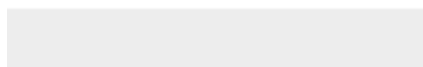



[Click here to access/download](#)

**Supporting Information**

[S3 File\\_Supplementary BIC scores.xlsx](#)



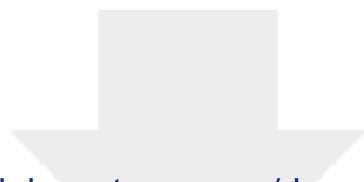

[Click here to access/download](#)

**Supporting Information**

S4 File\_Additional BIC scores.xlsx

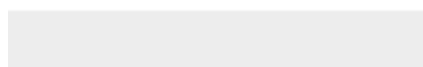



Click here to access/download  
**Supporting Information**  
S5 File\_Supporting data.xlsx

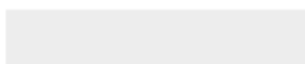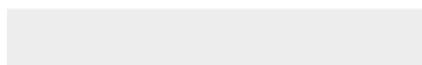

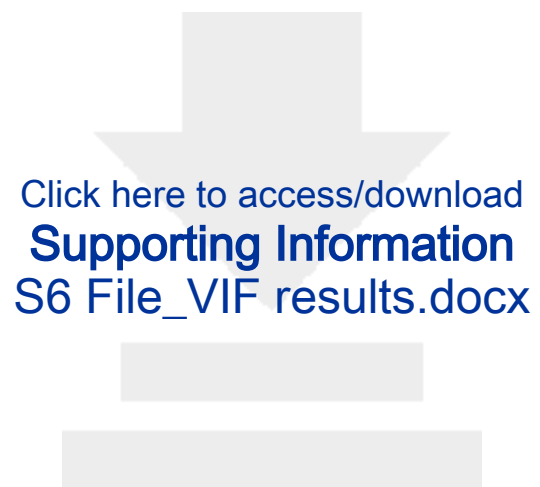

Click here to access/download  
**Supporting Information**  
S6 File\_VIF results.docx

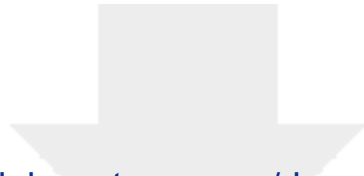

Click here to access/download

**Supporting Information**

S7 File\_Data collection sources.docx

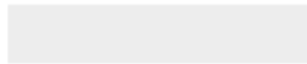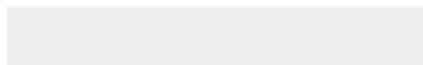



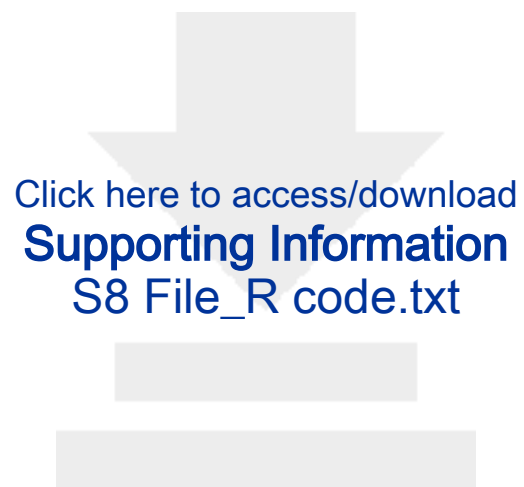

Click here to access/download  
**Supporting Information**  
S8 File\_R code.txt

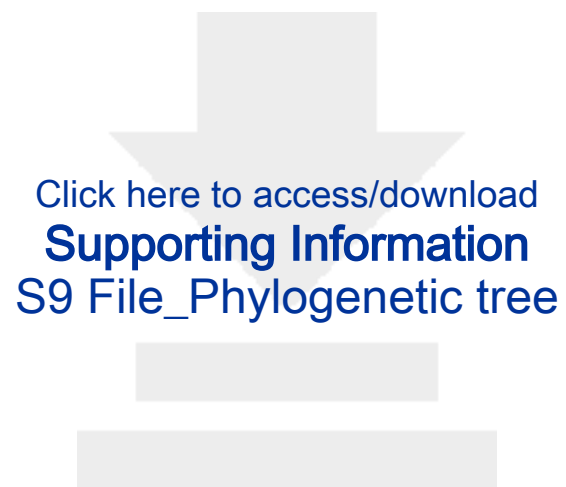

Click here to access/download  
**Supporting Information**  
S9 File\_Phylogenetic tree

1 **Title:** Why big brains? A comparison of models for both primate and carnivore  
2 brain size evolution

3 **Running title:** Why big brains?

4 **Authors:** Helen R Chambers<sup>1, 3</sup>, Sandra A Heldstab<sup>2</sup>, Sean J O'Hara<sup>1</sup>

5

6 <sup>1</sup>University of Salford, School of Science, Engineering & Environment, Peel Building, Salford,  
7 Greater Manchester, M5 4WT, United Kingdom

8 <sup>2</sup>Department of Anthropology, University of Zurich, Winterthurerstrasse 190, CH-8057  
9 Zurich, Switzerland

10 <sup>3</sup>Correspondence: [h.r.chambers@edu.salford.ac.uk](mailto:h.r.chambers@edu.salford.ac.uk)

11

12 Orchid IDs:

13 <https://orcid.org/0000-0001-7251-1166>

14 <https://orcid.org/0000-0002-8908-7522>

15 <https://orcid.org/0000-0002-5909-1870>

16

17

18

19

## 20 Abstract

21 Despite decades of research, much uncertainty remains regarding the selection pressures  
22 responsible for brain size variation. Whilst the influential social brain hypothesis once  
23 garnered extensive support, more recent studies have failed to find support for a link  
24 between brain size and sociality-acting as an evolutionary driver. Instead, it appears there is  
25 now substantial evidence suggesting ecology better predicts brain size in both primates and  
26 carnivores. Here, different models of brain evolution were tested, and the relative  
27 importance of social, ecological, and life-history traits were assessed on both overall  
28 encephalisation and specific brain regions. In primates, evidence is found for consistent  
29 associations between brain size and ecological factors, particularly diet; however, evidence  
30 was also found advocating sociality as a selection pressure driving brain size. In carnivores,  
31 evidence suggests ecological variables, most notably home range size, are influencing brain  
32 size; whereas, no support is found for the social brain hypothesis, perhaps reflecting the fact  
33 sociality appears to be limited to a select few taxa. In carnivores, evidence suggests multiple  
34 selection pressures, both ecological and social, are influencing brain size within the  
35 Carnivora order. Life-history associations reveal complex selection mechanisms to be large-  
36 brained primates and carnivores are counterbalancing the costs associated with expensive  
37 brain tissue through extended developmental periods, reduced fertility, and extended  
38 maximum lifespan. Critically, the use of different body size correction factors, such as  
39 relative brain size or encephalisation quotient, yielded disparate results. This hinders  
40 modern research, as without clarity regarding what is the most suitable correction measure,  
41 there is little certainty concerning the 'true' correlates of brain size. Future studies should  
42 give careful consideration of the body size correction factors, methods chosen for measuring

43 ~~brain size as outlined herein, investigate both whole brain and specific brain regions where~~  
44 ~~possible,~~ and look to integrate multiple variables, thus fully capturing all of the potential  
45 factors influencing brain size.

46 **Key words:** brain size, primates, carnivores, sociality, diet, encephalisation

47

48

## 49 **Introduction**

50 Brain size varies considerably amongst mammals; substantial variation is seen amongst  
51 primates, where brain size varies almost a thousand-fold across the order (1) ~~(Barton, 2012).~~  
52 The adaptive value of such variation has come under extensive scrutiny over the past few  
53 decades and yet despite considerable research effort, much uncertainty remains regarding  
54 the selection pressures responsible.

55 Frequently proposed to explain variation in brain size are factors related to the physical  
56 environment, such as diet and home range size, as well as factors related to the social  
57 environment, such as group size and pair-bondedness. Ecological hypotheses mainly involve  
58 investigating the cognitive demands associated with foraging (2-7) ~~(Parker & Gibson, 1977;~~  
59 ~~Milton, 1981; Barton, Purvis & Harvey, 1995),~~ as foraging is considered mentally demanding  
60 due to the pressure of managing, processing and remembering spatial and temporal  
61 information about resource availability (8-12) ~~(Clutton-Brock & Harvey, 1980; Barton, 2000;~~  
62 ~~Heldstab et al., 2016).~~ Additionally, differing home range size is have been of interest to  
63 researchers for many years; due to the supposed cognitive demands imposed by larger  
64 home ranges, such as processing requirements of navigating spatially-complex information,

65 especially in terms of food availability, location and distribution (9, 13-15). This has resulted  
66 in many studies investigating the cumulative effects of the physical environment on  
67 encephalisation, with a specific interest in diet (16-20)(Walker et al., 2006; (17)van Woerden  
68 et al., 2010;(18) Swanson et al., 2012; DeCasien et al., 2017), home range (13, 14)(Parker,  
69 2015; Powell et al., 2017), foraging techniques (12, 21-23)(Gibson, 1986;[Reader, 2011  
70 #220] Reader et al., 2011; Plante et al., 2013; Heldstab et al., 2016) and behavioural  
71 responses in a fluctuating environment (24)(Sol et al., 2005).

72 In contrast to ecological hypotheses, the social brain hypothesis (SBH) suggests sociality –  
73 specifically the cognitive demands of tracking, negotiating and maintaining social  
74 relationships – to be the main driving force behind variation in primate brain sizes (25-  
75 27)(Whiten & Byrne, 1988; Dunbar, 1998; Dunbar, 2009). The study of primates lends  
76 credence to this hypothesis, with brain size found to correlate with many social proxies,  
77 such as social group size (28)(Dunbar, 1992), tactical deception (29)(Byrne & Corp, 2004)  
78 and grooming clique size (30)(Kudo & Dunbar, 2001). Evidence has since not been limited to  
79 studies of the primate lineage, with corroboration coming from research on spotted hyenas  
80 (31, 32)(Holekamp et al., 2015; Sakai et al., 2011), as well as other carnivorans (33-  
81 35)(Dunbar & Bever, 1998; Shultz & Dunbar, 2007; Pérez-Barbería et al., 2007;), ungulates  
82 (36, 37),(Pérez-Barbería & Gordon, 2005; Shultz & Dunbar, 2006; Emery et al., 2007) birds  
83 (38-40),(Scheiber et al., 2008; Shultz & Dunbar, 2010) and some fish species (41-  
84 43)(Gonzalez-Voyer et al., 2008; Bshary, 2011; Triki et al., 2019). The focal point of much of  
85 the early work investigating sociality was social group size, due to the information-  
86 processing demands group of increasing sizes are thought to incur (26). However, the use of  
87 this proxy for measuring social complexity has been criticised (44), and instead, focus has  
88 shifted to the consequences of varying levels of relationship complexity (45). Additionally,

89 ~~since being established, the SBH has further developed, moving away from the original focal~~  
90 ~~point of group size,~~ and toward investigating the influence of pair-bondedness (27, 46-  
91 48)(~~Dunbar, 2009~~). This developed from the proposition that relationship quality (45,  
92 49)(~~Silk, 2012; Bergman & Beehner, 2015~~) connotes cognitive complexity.

93 Despite the hypothesis receiving considerable support in the past, more recent  
94 investigations have failed to find statistical support for a link between brain size and  
95 sociality (~~e.g., (14, 19, 20, 50, 51)Swanson et al., 2012; MacLean et al., 2014; van Schaik et~~  
96 ~~al., 2016; Powell et al., 2017; DeCasien et al., 2017~~). Instead, it appears there is now  
97 substantial, strong, phylogenetically-corrected comparative data reinforcing the assertion  
98 that diet better predicts brain size in both primates and carnivores (14, 20, 52)(~~Holekamp &~~  
99 ~~Benson-Amram, 2017~~). In addition, the obvious exceptions to the SBH, taxa who possess  
100 large brains but who are not considered social, suggest factors other than sociality may be  
101 influencing brain size (19, 53, 54)(~~Holekamp, 2007; Swanson et al., 2012; van Schaik et al.,~~  
102 ~~2012~~). For example, if sociality is to be accepted as the causal agent for increased  
103 encephalisation in mammals, it should be wide-spread across bears and musteloids, who  
104 show similar encephalisation increases to Canidae (55)(~~Finarelli & Flynn, 2009~~).

105 A further problem to have dogged comparative analyses of brain evolution is deciding on  
106 the correct brain measure. Whilst most studies tend to focus on whole brain size, even this  
107 can become an arduous task since there is little clarity in the literature regarding the most  
108 appropriate body size correction factor, making decisions on the correct method of choice  
109 challenging. Typically, cognitive abilities are estimated using relative brain size, by taking  
110 residuals from a regression curve or calculating encephalisation quotients (56, 57)(~~van~~  
111 ~~Schaik, Isler & Burkart, 2012~~). This became the method of choice when brain and body size

112 were found to be tightly coupled allometrically across vertebrates; therefore, accounting for  
113 this allometric relationship became of great importance (35, 58)(Shultz & Dunbar, 2010).  
114 Thus, relative brain size is now favoured, as absolute brain size has been found to be  
115 “invariably strongly correlated with body size” in most taxa (Pérez-Barbería et al., 2007, p.  
116 2812). However, the use of relative brain size and encephalisation quotients is not without  
117 criticism; for example, using residuals as data points in regression models has been heavily  
118 discouraged, as the estimates produced are thought to be biased, which influences any  
119 subsequent analyses (59, 60). With encephalisation quotients possibly reflecting the result  
120 of recent decreases or increases in body size (61)(Barton, 2000), evidence of which for such  
121 was uncovered by (19). They, who found carnivore brain size to lag behind body size over  
122 evolutionary time, therefore hinting that the use of brain estimates may be a poor  
123 representation of carnivore brain size. H; however, no evidence for this brain size lag  
124 hypothesis was found for primates (62)(Deaner & Nunn, 1999), suggesting this may not be  
125 the case a taxonomic difference for this group (Deaner & Nunn, 1999). Alongside this, -and  
126 the prevalent use of relative brain size is thought to possibly hiding other evolutionary  
127 pathways which may be influencing adaptations in body mass (63)(Smaers et al, 2012). F; for  
128 example, a recent analysis of mammalian brain size found the brain-to-body relationship to  
129 uncover more than just selection on brain size, indicating relative brain size measures are  
130 not accurately capturing brain size variation (64). Thus, (65) suggests the use of  
131 encephalisation quotients should be avoided in future studies, as EQs have repeatedly failed  
132 to accurately predict brain size, and thus, varying levels of cognitive ability. For example,  
133 (57) Swanson et al. (2012) for example, found carnivore brain size to lag behind body size  
134 over evolutionary time, therefore hinting that the use of brain estimates may be a poor  
135 representation of carnivore brain size. Deaner et al. (2007) found absolute brain size



136 measures, over statistically ~~controlled-produced~~ methods i.e., residuals, to be the best  
137 predictors of primate cognitive abilities. ~~In fact, van Schaik et al., (2021) suggest the use of~~  
138 ~~encephalisation quotients should be avoided in future studies.~~

139 Alongside the use of total brain size, particular emphasis has been put on specific brain  
140 regions in recent years. The social brain hypothesis suggests the neocortex is the brain  
141 structure of interest, with primates' large brains thought to be mainly the consequence of a  
142 dramatic increase in neocortical volume (66-68) ~~(Finlay & Darlington, 1995; Finlay et al.,~~  
143 ~~2001; Cantania, 2004)~~. The neocortex is thought foremost responsible for the processing of  
144 more demanding cognitive and social skills (69, 70) ~~(Innocenti & Kaas, 1995; Kaas, 1995)~~  
145 associated with intelligent and flexible behaviour (61) ~~(Barton & Harvey, 2000)~~. Neocortical  
146 enlargement in primates is thought to be partly due to selection on visual mechanisms (71)  
147 which is important for frugivorous species, for example ~~who have~~when needing to  
148 distinguish between fruits of different colours (72-74) ~~or have to~~when manipulating ~~small~~  
149 fruit and seeds ~~that~~which require fine ~~motor~~ coordination (75). Alternatively, these visual  
150 mechanisms are thought to be important for processing complex and rapid social  
151 interactions, including understanding facial expressions, gaze direction and posture (76),  
152 suggesting that neocortical modifications associated with complex social lives primarily  
153 involve areas ~~specialized~~ for visual processing of social information (77). In primates, the  
154 neocortex constitutes a substantial portion of the brain (66, 67), ~~and a large proportion of~~  
155 the neocortex is comprised of visual information processing areas (71, 78, 79), which is  
156 thought to explain links found between frugivory and brain size (see -(20)), ~~as well as, social~~  
157 group size and neocortex volume (see (1, 71)).

158 Alongside research into the neocortex, attention ~~has been~~ focused on the cerebellum and  
159 its importance. The cerebellum was found to co-evolve with the neocortex (61)(~~Barton &~~  
160 ~~Harvey, 2000~~), with a significant correlation found between these two brain regions  
161 (80)(~~Barton, 2002~~). Increased cerebellar volume is suggested to allow increased processing  
162 capacity, in terms of enhanced motor abilities and manipulative abilities (81, 82). F, for  
163 example, in primates positive correlations were found between cerebellum volume and  
164 extractive foraging techniques (1), as well as the presence of neural activation in the  
165 cerebellum during tool use in monkeys (83), ~~suggesting the cerebellum is important.~~ This  
166 highlights the influential role played by the cerebellum in technical intelligence (84).  
167 Alongside this, the cerebellum is thought to be important in social intelligence (1),  
168 particularly in terms of the links between sensory-motor control and social interactions and  
169 understanding (85, 86). Indeed, it is now thought the expansion of the cortico-cerebellar  
170 system is the primary driver of brain expansion in anthropoid primates (87)(~~Smaers &~~  
171 ~~Vanier, 2019~~), suggesting the increased behavioural complexity in mammals could be partly  
172 explained by selection on the cerebellum (88)(~~Smaers et al., 2019~~). So much so, that  
173 (89)~~Fernandes et al. (2020)~~ found residual cerebellar size to be the most appropriate proxy  
174 when compared to a measure of general intelligence models; as cerebellar models produced  
175 the most similar model fit results when compared to those produced using a measure of  
176 general intelligence.

177 Here, using data ~~collected~~ aggregated from the literature ~~the,~~ the relative importance of  
178 social, ecological and life history traits ~~are~~ assessed on both overall encephalisation and  
179 specific brain regions, and different models of brain size evolution ~~are~~ tested.

180 Considerable attention has been paid to primate brain evolution, ~~perhaps since there are~~  
181 substantial data available on this taxonomic group (e.g., (14, 20, 90, 91)~~Isler & van Schaik,~~

182 ~~2012; Powell et al., 2017; DeCasien et al., 2017; DeCasien & Higham, 2019)~~ perhaps since  
183 there are substantial data available on this taxonomic group making comparative tests easy  
184 to implement. Likewise, cCarnivorans have are also begun now receiving attention (e.g., (19,  
185 88, 92, 93)~~Swanson et al., 2012; Sakai et al., 2016; Smaers et al., 2018; Heldstab et al., 2019)~~  
186 with their since variation in their brain and body size, and ranging social and physical  
187 environments, making ing them excellent models for these tests too. Indeed, most of the  
188 literature surrounding brain size hypotheses is based on analyses of these two groups.  
189 One aim here, therefore, is to provide ~~Thus, by drawing greater clarity within these two~~  
190 ~~groups, this will hopefully allow for more reliable and robust analyses of other taxonomic~~  
191 ~~groups.~~ Integrating predictors into a framework which allow the assessment of multiple  
192 hypotheses simultaneously has become increasingly important for tests of brain evolution  
193 (94, 95)~~(Dunbar & Shultz, 2007, 2017)~~. Therefore, phylogenetically-corrected generalised  
194 least squares (PGLS) models are used here to account for shared evolutionary history,  
195 whilst assessing the potential variables influencing encephalisation.  
196 We use a recently updated phylogenetic tree to ensure phylogenetic relationships are  
197 contemporary. Further, the inclusion of multiple variables allows the comparison of multiple  
198 hypotheses, as well as models of varying complexity. While brain data are available for more  
199 taxa than are included in our dataset, we found some limitations on the completeness of  
200 the necessary covariate data. We present here our analyses of two orders where complete  
201 datasets with all covariates are available for all species, ensuring the most robust model  
202 comparisons. Ultimately, this study aimed to go beyond previous studies of brain size  
203 evolution, which are often restricted by small sample sizes and the method of addressing  
204 only one hypothesis at a time, to draw more robust and reliable results on the proposed

Formatted: Not Highlight

205 correlates of brain size within two well-studied taxonomic groups. To achieve this, we  
206 implemented the use of robust statistical analyses which accounted for the influence of  
207 relatedness, a recently updated phylogenetic tree to ensure phylogenetic relationships were  
208 contemporary, substantial sample sizes which surpassed previous studies and increased  
209 statistical power, and importantly, the inclusion of multiple variables which allowed the  
210 comparison of multiple hypotheses, as well as, models of varying complexity. Additionally,  
211 to further investigate the use and merits of different brain measures in comparative  
212 analyses, multiple measures of brain size were used, including the calculation of  
213 encephalisation quotients (EQ) and use of residuals as relative brain size (RBS).

214

## 215 **Methods**

### 216 **Data Collection**

#### 217 **Brain data**

218 Endocranial volume (ECV) and body mass data for primates (n = 83) and carnivores (n = 85)  
219 were compiled from multiple sources (see supplementary material). Volumes were matched  
220 for species composition and predictor variables, and whilst this resulted in smaller sample  
221 sizes when compared to available brain data, in doing so it provided a complete dataset  
222 with all covariates available for all species, better enabling robust analyses. ECV data were  
223 preferred over brain mass data since it is thought ECV provides a more reliable estimate of  
224 brain size, due to the influence of preservation techniques on brain mass (96) (Isler et al.,  
225 2009). ECV is most frequently estimated The standard technique for estimation of ECV is  
226 throughby filling the cranium with beads (or similar), which is then measured using a

227 graduated cylinder or by weighing the beads and converting the weight to volume (96).  
228 Neocortex and cerebellum volumes were also collated, where available, for both primates  
229 (Neo = 52, Cere = 49) and carnivores (Neo = 44, Cere = 38). These two brain measures were  
230 selected for use in the analyses since both have received much attention from researchers  
231 in recent years. Regional brain volumes are commonly measured using one of two different  
232 techniques; virtual endocasts (e.g., (19)) or physical sectioning of the individual brain  
233 volumes using paraffin and staining substances (e.g., (97)). When sourcing ~~all~~ whole and  
234 regional brain volumes these measurement methods were considered to ensure the data  
235 were comparable; for example, all ECV data sources used common measurement  
236 techniques (as described above) making the whole brain data comparable across multiple  
237 studies. ~~These two brain measures were selected for use in the analyses since both have~~  
238 ~~received much attention from researchers in recent years. The neocortical region became~~  
239 ~~the focus of many comparative analyses, especially since the SBH was proposed (Dunbar,~~  
240 ~~2009). Attention, however, has now shifted to the cerebellum, as it is thought to play more~~  
241 ~~of a substantial role in cognition than was previously assumed (Barton, 2012; Barton &~~  
242 ~~Venditti, 2014).~~

## 243 **Social data**

244 Both social group size and social cohesion data were collected for primates and carnivores.  
245 Group size – based on the simple principle that as group size increases, the information-  
246 processing demands (26) ~~(Dunbar, 1998)~~ and corresponding internal structures (98,  
247 99) ~~(Sallet et al., 2011; Powell et al., 2012)~~ should also increase – became perhaps the most  
248 commonly used proxy for social complexity. Despite this, the use of this proxy has been  
249 criticised as it is often considered crude, weak, and not always relevant (44) ~~(Byrne & Bates,~~

250 ~~2007~~). Greater attention is now paid to differing levels of relationship complexity  
251 (45)(~~Bergman & Beehner, 2015~~) often indicated through the presence of pair-bonds (27, 34,  
252 100)(~~Shultz & Dunbar, 2007; Dunbar & Shultz, 2007; Dunbar, 2009~~). Therefore, to ensure  
253 the influence of sociality was fully captured, alongside group size, a social cohesion proxy  
254 was used: a categorisation system ranging from 1 being primarily solitary living aside from  
255 breeding seasons, 2 pair-living, 3 fission-fusion societies, to 4 being obligatorily social(~~one~~  
256 ~~to four~~) (e.g., (91, 101)~~DeCasien & Higham, 2019; Stankowich et al., 2014~~). This index aims  
257 to better encapsulate sociality, rather than relying solely on group size numbers.

## 258 **Ecological data**

259 Four ecological variables were chosen for analysis: dietary categories, dietary breadth,  
260 habitat variability and home range size. Dietary categories were assigned following previous  
261 designations in the published literature (see supplementary material for sources) and  
262 included six different categories: carnivorous, herbivorous, piscivorous, folivorous,  
263 frugivorous and omnivorous. Alongside this traditional classification system, dietary breadth  
264 was also used, estimated using the total number of food sources used by a species, with  
265 data taken from ~~Wilman et al. (102)(2014)~~. This included a total of 10 different food types:  
266 invertebrates, mammals and birds, reptiles, fish, unknown vertebrates, scavenge, fruit,  
267 nectar, seed- or other plant material, marked either as absent (0) or present (1). For this  
268 dataset, this resulted in a dietary breadth scale of one to six. By incorporating both of these  
269 dietary variables into analyses, this allows further investigation into the role diet has in brain  
270 evolution. For example, certain diets are thought to be more cognitively demanding, such  
271 as, frugivory, which is assumed to require greater spatial memory and food processing  
272 techniques, potentially leading to increased encephalisation (Milton, 1981; Parker & Gibson,

273 ~~1997; Barton, 2000~~. Habitat variability, another ecological measure, was formed using data  
274 from the IUCN Red List (103)~~(2020)~~, based on the total number of habitat-types used by a  
275 species, following the same habitat classification system used in the IUCN Red List.

276 Additionally, home range size data were collected. ~~This variable has been of interest to~~  
277 ~~researchers for many years; due to the supposed cognitive demands imposed by larger~~  
278 ~~home ranges, such as processing requirements of navigating spatially complex information,~~  
279 ~~especially in terms of food availability, location and distribution (Clutton-Brock & Harvey,~~  
280 ~~1980; Parker, 2015; Powell et al., 2017)~~. By including variables related both to diet and  
281 habitat (~~i.e., imposing both temporal and spatial cognitive demands~~), it alloweds greater  
282 incorporation of possible variables within the physical environment affecting brain size.

### 283 **Life-history data**

284 Life-history variables have been found to be critical in counterbalancing the costs of  
285 increased brain size and facilitating exert considerable influence on cognitive evolution and  
286 the growth of large brains (104)~~(van Schaik and Deaner, 2003)~~. In fact, they appear ~~crucial to~~  
287 be influencing in determining the potential adaptive pathways available to a species  
288 (94)~~(Dunbar & Shultz, 2007)~~, for example in terms of balancing shifting developmental and  
289 maturation periods. Developmental costs are also thought to influence correlations  
290 between specific primate brain structures and life history variables, with the neocortex most  
291 strongly correlated with gestation length, and the cerebellum with juvenile period length,  
292 suggesting that these brain regions exhibit distinct life-history correlates which concur with  
293 their unique developmental trajectories (105). Hence, it ~~seemed was~~ necessary to include  
294 certain life history variables in the analysis to further understand how life-history  
295 characteristics potentially act as a filter (104, 106)~~(Isler & van Schaik, 2014; van Schaik and~~

296 ~~Deaner, 2003~~) for the production of large brains. Gestation length was chosen as it has  
297 received considerable attention and is thought to be of great importance in bypassing the  
298 constraints of precociality in mammals and facilitating brain growth (107) ~~(Weisbecker &~~  
299 ~~Goswami, 2010)~~. Maximum lifespan was included as there is substantial support that  
300 encephalisation is correlated with extended longevity (104) ~~(van Schaik and Deaner, 2003)~~,  
301 especially in primates (108, 109) ~~(DeCasien et al., 2018; Street et al., 2017)~~. The relationship  
302 found between brain size and lifespan is thought to be driven primarily by maternal  
303 investment, with subsequent correlations found between specific brain regions and  
304 developmental periods, reflecting this brain size-lifespan association (see (105, 110).  
305 Ultimately encephalisation has been found to correlate with expansion of most  
306 developmental life history stages, including an extended reproductive lifespan  
307 (111) ~~(Barrickman et al., 2008)~~. ~~Therefore,~~ data on age at first reproduction, weaning and  
308 fertility (measured as number of offspring per year) were added to our dataset (see  
309 supplementary material for sources).

## 310 **Statistical Analyses**

### 311 **Brain transformations**

312 ~~Whole b~~Brain volumes were incorporated in analyses ~~by using three different methods: (1)~~  
313 simple incorporation of log ~~ECV~~brain volume with log body mass included as a covariate. ~~(2)~~  
314 ~~(2) using residuals from a regression line, and (3) calculation of encephalisation quotients.~~  
315 ~~This former~~ method is often preferred over the use of residuals as variables in ecological  
316 datasets often covary thereby producing biased parameter estimates when calculating  
317 residuals (59) ~~(Freckleton, 2002)~~. Including body mass as a covariate in the model avoids this  
318 problem, controls for its effect on brain volume, as well as potentially controlling for any



319 effects body mass may have on other variables included. ~~Despite criticism, the use of~~  
320 ~~residuals is still present, therefore we considered it prudent to use both methods in the~~  
321 ~~analyses for comparative purposes. Phylogenetic generalised least-squares regression~~  
322 ~~analysis (PGLS) was used to regress log brain volume against log body mass, which produced~~  
323 ~~residual estimates of relative brain size after accounting for body mass. This was repeated~~  
324 ~~for neocortex and cerebellum volumes. Encephalisation quotients were also calculated as a~~  
325 ~~further measure of relative brain size. EQs were derived from our dataset, using the~~  
326 ~~allometric formula  $E = kP^\alpha$ , where E = brain mass, P = body mass, k = y intercept~~  
327 ~~(proportionality constant) and  $\alpha$  = allometric exponent. For the primate data this made the~~  
328 ~~final equation:  $\text{brain volume} / (0.073 \times \text{body mass}^{0.89})$ . For the carnivore data this made the~~  
329 ~~final equation:  $\text{brain volume} / (0.145 \times \text{body mass}^{0.65})$ . Regional brain volumes were~~  
330 ~~incorporated in analyses by simple incorporation of log ROB (rest of brain) volume. To~~  
331 ~~calculate ROB volume for both the neocortex and cerebellum, a simple calculation was~~  
332 ~~performed: whole brain volume minus the region volume of interest. This method has been~~  
333 ~~previously implemented and proved useful in measuring relative regional brain volumes~~  
334 ~~(e.g., [see](#) (91)). Further analyses were also conducted in order to test how uniform results~~  
335 ~~were when using different brain size measures. The results of these analyses are displayed~~  
336 ~~and discussed in the supplementary material.~~  
337 ~~This allowed for seven different brain calculation inputs, (1) log ECV with log body mass, (2)~~  
338 ~~relative brain size, (3) encephalisation quotients, (4) relative neocortex volume, (5) relative~~  
339 ~~cerebellum volume, (6) log neocortex volume with log body mass, (7) log cerebellum volume~~  
340 ~~with log body mass.~~

#### 341 PGLS analysis

342 All statistical analyses were performed using R 4.0.1, using the 'caper', 'ape' and 'geiger'  
343 packages. Phylogenetic generalised least-squares (PGLS) regression analysis (PGLS) analysis  
344 was used to identify those variables influencing whole and regional brain evolution, whilst  
345 avoiding the problem of phylogenetic non-independence. This technique differs from  
346 standard generalised least squares analysis, as it uses knowledge of phylogenetic  
347 relationships or relatedness to produce estimates of the expected covariance across species  
348 (112). Pagel's  $\lambda$  was estimated by maximum likelihood. The tree used for all phylogenetic  
349 analyses was that of Upham et al's (113)(2019). All continuous variables, brain volumes and  
350 body mass were log transformed prior to analysis to satisfy the assumption of normality.  
351 Variance Inflation Factor (VIF) scores were used to check for the presence of  
352 multicollinearity, with almost all scores found to be below 5, and no scores above 7. There  
353 were no scores produced which highlighted concern, and thus, all socioecological and life-  
354 history variables were retained for analysis 8 (see supplementary material).

### 355 **Model comparisons**

356 A series of PGLS models were implemented which varied in complexity, including 1) social,  
357 2) ecological, 3) social and ecological, 4) life history and 5) variables of interest. Models one  
358 to four included all possible combinations of the selected variables; for example, the social  
359 model included i) group size, ii) social cohesion, iii) group size and social cohesion. BIC  
360 (Bayesian Information Criterion) values of each model were then compared (114). As lower  
361 BIC values indicate the presence of better fitting, more parsimonious models, the model  
362 with the lowest BIC value was deemed to best explain the data, therefore considered  
363 preferable and retained. BIC values were preferred over Akaike Information Criterion  
364 values because BIC resolves the problem of overfitting, by using a more conservative

365 penalty for additional variables. AIC (Akaike Information Criterion) values of each model  
366 were then compared (Akaike, 1974). As lower AIC values indicate the presence of better  
367 fitting, more parsimonious models, the model with the lowest AIC value was deemed to  
368 best explain the data, therefore considered preferable and retained. Thus, M<sub>5</sub> model  
369 number five was constructed using all variables previously highlighted of interest within the  
370 social, ecological, and life history models. This allowed us to compare the importance of  
371 social versus ecological models, as well as construct models including those variables that  
372 best explained the data. Once completed, model five was compared alongside the previous  
373 models, and those found to have the lowest BIC value were then considered the 'best fit'  
374 models, which in some cases represents a subset of models (simply, any model within  
375 ΔBIC < 2 of the lowest model). This is because BIC values with a difference of between 2 and  
376 6 indicate moderate evidence that the model with the lower BIC provides a relatively better  
377 model fit, whilst greater than 6 indicates strong evidence for improved fit. ~~presently, and~~  
378 subsequently, brain size.

### 379 **Possible Limitations**

380 The *a priori* protocol followed here, that resulted in the model with the absolute lowest AIC  
381 score being considered preferable and retained, does draw certain limitations. For  
382 example, there may be another model within two AIC units of the 'preferred' model,  
383 meaning there is no statistical difference between the two. Therefore, when compared, the  
384 'preferred' model and the correlations found therein, are not considered superior or more  
385 reliable. However, this *a priori* protocol was chosen to ensure systematic uniformity in  
386 procedure and to allow the construction of models using variables of interest.

### 387 **Results**

Formatted: Font: Italic

388 **Primates**

389 The results from PGLS analysis on the primate data is shown in Table 1. Almost all models  
390 were highly significant. For most models  $\lambda$  was close to one, indicative of a Brownian motion  
391 model of trait evolution; however, ~~certain neocortex models both cerebellum models~~  
392 ~~(relative cerebellum size and log cerebellum volume)~~ stand in contrast to this, with  $\lambda$  equal  
393 to zero, implying the data have no phylogenetic structure (84) ~~(Barton & Venditti, 2014)~~.  
394 Combined models were preferred ~~when investigating both whole and regional brain~~  
395 ~~volumes when using all but one (EQ) brain inputs~~, with significantly improved (equal or  
396 greater than two AIC-BIC units lower than another) AIC-BIC scores when combining variables  
397 indicated to be of importance in previous model iterations. When comparing the influence  
398 of ecology versus sociality, ~~in contrast to this, within the EQ models, there was no significant~~  
399 ~~difference between the ecological, social & ecological, and combined models. Despite this,~~  
400 ~~when using all brain transformation methods, e~~ecological models were found to be  
401 preferable to social models, evidenced by the presence of significantly improved AIC-BIC  
402 scores.

403

404 Table 1 about here

405

406 **Overall encephalisation**

407 The results of PGLS analysis on endocranial volume, ~~data relative brain size and~~  
408 ~~encephalisation quotient~~ are presented in Table 1, with the 'best fit' models presented in  
409 Table 2. The variables which were indicated to be of importance and included ~~with~~in the

Formatted: Font: Italic

410 *'best fit'* endocranial volume models were: group size, dietary breadth, gestation length,  
411 maximum lifespan and weaning age. Also present *with*in the subset of *'best fit'* models  
412 were: social cohesion and home range. After accounting for phylogeny, both group size and  
413 social cohesion were found to be positively associated with ECV ( $P < 0.05$ ). Although, social  
414 cohesion ~~did~~failed to ~~reach~~find significance in certain model iterations ( $P = 0.06$ ). In terms of  
415 the ecological variables, dietary breadth was consistently associated with ECV ( $P < 0.001$ );  
416 however, home range size failed to ~~reach~~find significance ( $P = 0.11$ ). Three of the life-history  
417 variables were significantly associated with ECV: gestation length, maximum lifespan and  
418 weaning age ( $P < 0.01$ ). After accounting for phylogeny, diet was found to be positively  
419 associated with all whole brain measures. Dietary breadth was positively associated with  
420 ECV ( $P < 0.001$ ), RBS ( $P < 0.001$ ) and EQ ( $P < 0.01$ ). In addition, omnivory was positively  
421 associated with RBS and EQ ( $P < 0.01$ ). As well as the dietary variables, habitat variability was  
422 negatively associated with EQ ( $P < 0.05$ ). Three of the life-history variables were significantly  
423 associated with ECV: gestation length, maximum lifespan and weaning age ( $P < 0.01$ ),  
424 however only gestation length was found to be associated with RBS ( $P < 0.05$ ). Social  
425 cohesion was close to being associated with ECV; however, this association fell short of  
426 significance ( $P = 0.06$ ). Frugivory, habitat variability and weaning age were also close to  
427 being associated with RBS ( $P = 0.07$ ,  $P = 0.09$ ,  $P = 0.06$  respectively). In addition, frugivory  
428 was close to being significantly correlated with EQ ( $P = 0.07$ ).

Formatted: Font: Italic

Formatted: Font: Italic

429

430 Table 2 about here

431

432 **Regional brain volumes**

433 The results of PGLS analysis on the neocortex and cerebellum ~~models data~~ are also  
434 presented in Table 1, with the *'best fit'* models presented in Table 2. The variables which  
435 were indicated to be of importance and included within the *'best fit'* neocortex model were:  
436 diet, home range size, maximum lifespan and weaning age. After accounting for phylogeny,  
437 diet, specifically frugivory and omnivory were found to be negatively associated with  
438 neocortex volume ( $P < 0.05$ ,  $P < 0.001$ ). This is the result produced when a folivorous diet is  
439 used as the baseline category, therefore the dietary category results produced here only  
440 demonstrates differences between these dietary groups (frugivory and omnivory) and  
441 folivory. Alongside these associations, home range size was positively correlated with  
442 neocortex volume ( $P < 0.01$ ). Similar to whole brain models, both maximum lifespan and  
443 weaning age were significantly associated with neocortex volume ( $P < 0.001$ ).

444 The variables which were indicated to be of importance and included ~~with~~ within the *'best fit'*  
445 cerebellum models were: diet, home range size, maximum lifespan and weaning age. Also  
446 present within the subset of *'best fit'* models was: gestation length. After accounting for  
447 phylogeny, diet, specifically omnivory was found to be negatively associated with  
448 cerebellum volume ( $P < 0.01$ ). Frugivory failed to be significant ( $P = 0.13$ ,  $P = 0.31$ ). As above,  
449 ~~this is the results produced~~ when a folivorous diet is used as the baseline category. Home  
450 range size was positively associated with cerebellum volume ( $P < 0.001$ ). Similar to previous  
451 life-history results, maximum lifespan and weaning age were significantly associated with  
452 cerebellum volume ( $P < 0.01$ ,  $P < 0.001$ ). Gestation length was close to being significantly  
453 correlated with cerebellum volume ( $P = 0.07$ ). After taking phylogeny into account, diet was  
454 found to be positively associated with both brain regions. Frugivory and omnivory were  
455 positively associated with RNS ( $P < 0.001$ ,  $P < 0.001$ ), neocortex volume ( $P < 0.01$ ,  $P < 0.001$ ),  
456 as well as RCS ( $P < 0.01$ ,  $P < 0.001$ ) and cerebellum volume ( $P < 0.001$ ,  $P < 0.001$ ). Social

Formatted: Font: Italic

Formatted: Font: Italic

Formatted: Font: Italic

Formatted: Font: Italic

457 cohesion was found to be significantly correlated with cerebellum volume ( $P < 0.05$ ).  
458 Similarly, to whole brain measures, gestation length was associated with neocortex volume  
459 ( $P < 0.05$ ) and weaning age was correlated with cerebellum volume ( $P < 0.05$ ). Additionally,  
460 fertility was found to be negatively associated with relative cerebellum volume ( $P < 0.05$ ).  
461 Gestation length was close to being associated with relative neocortex size; however, this  
462 association fell short of significance ( $P = 0.06$ ). Additionally, social cohesion and dietary  
463 breadth were close to being significantly correlated with neocortex volume ( $P = 0.06$ ).  
464

## 465 Carnivores

466 The results of PGLS analysis on the carnivore datas are presented Table 3. Almost all models  
467 were highly significant. Lambda was not consistent between the models, ranging from one  
468 to zero across the dataset. In terms of the 'best fit' models, those producing the lowest BIC  
469 score (or any score within  $\Delta BIC < 2$  of the lowest model), there was no significant difference  
470 between life history and combined models, and thus the results of all these models are  
471 discussed below. When comparing the influence of ecology versus sociality, ecological  
472 models were found to be preferable to social models when investigating regional brain  
473 volumes, evidenced by the presence of significantly improved BIC scores. However, this was  
474 not the case in whole brain models, where there was no significant difference between the  
475 preferred social and ecological models. All models including body mass were highly  
476 significant; however, only seven models were found to be significant when using different  
477 body size transformation methods. Lambda was not consistent between the models,  
478 ranging from one to zero across the dataset. Whilst the combined models had the lowest  
479 AIC scores for most of the carnivore models, these scores were not significantly improved

Formatted: Font: Italic

480 upon, as the differences were not equal or greater than two AIC units lower than another.  
481 Similarly, within the EQ models, the life history model had the lowest AIC score, however  
482 this was not significantly different to the combined model (with a difference of 0.06).  
483 Interestingly, in both cerebellum inputs, the social models had the lowest AIC scores;  
484 however similarly to the other carnivore results, the scores were within two AIC units of  
485 another model. In contrast to the primate data, generally there is no significant difference  
486 between the ecological and social models, excluding the cerebellum models where social  
487 models have significantly improved AIC scores.

488

489

490 Table 3 about here

491

## 492 Overall encephalisation

493 The results of PGLS analysis on endocranial volume data are presented in Table 3, with the  
494 'best fit' models presented shown in Table 4. The variables which were indicated to be of  
495 importance and included within the 'best fit' endocranial volume models were: fertility,  
496 dietary breadth, maximum longevity and age at first reproduction. After accounting for  
497 phylogeny, fertility was found to be negatively associated with ECV (P <0.05), with this being  
498 the only variable significantly associated with endocranial volume. For example, dietary  
499 breadth was close to being negatively associated with ECV, but this fell short of significance  
500 (P = 0.05). In addition, both maximum lifespan and age at first reproduction, failed to  
501 find reach significance (P = 0.08, P = 0.10), relative brain size and encephalisation quotient

Formatted: Font: Italic

Formatted: Font: Italic



502 are shown in Table 4. After taking phylogeny into account, dietary breadth was found to be  
503 negatively associated with endocranial volume ( $P < 0.05$ ). Two life-history variables were  
504 also significantly correlated with whole brain measures; fertility was negatively correlated  
505 with ECV ( $P < 0.05$ ), RBS ( $P < 0.01$ ) and EQ ( $P < 0.05$ ), as well as weaning age which was  
506 negatively correlated with EQ ( $P < 0.05$ ). Dietary breadth was close to being significantly  
507 correlated with RBS; however, this association fell short of significance ( $P = 0.07$ ).

508

509

510 Table 4 about here

511

## 512 Regional brain volumes

513 The results of PGLS analysis on the neocortex and cerebellum data are presented in Table 3,  
514 with the 'best fit' models presented shown in Table 4. The variables which were indicated to  
515 be of importance and included within the 'best fit' neocortex models were: age at first  
516 reproduction, maximum lifespan and home range size. After accounting for phylogeny, age  
517 at first reproduction was found to be positively associated with neocortex ( $P < 0.001$ ), with  
518 this being the only variable significantly associated with neocortex volume. For example,  
519 home range size was close to being positively associated with neocortex volume, but this  
520 fell short of significance ( $P = 0.07$ ). In addition, maximum lifespan failed to reach  
521 significance ( $P = 0.19$ ). The results of PGLS analysis on the neocortex and cerebellum models  
522 are also presented in Table 4. After taking phylogeny into account, social cohesion was  
523 found to be negatively correlated with both relative cerebellum and cerebellum volume ( $P$

Formatted: Font: Italic

Formatted: Font: Italic

524 <0.05). Similar to whole brain measures, fertility and weaning age were found to be  
525 negatively associated with relative neocortex and neocortex volume ( $P < 0.001$ ,  $P < 0.05$   
526 respectively), as well as age of first reproduction, which was also negatively correlated with  
527 RNS ( $P < 0.05$ ).

528  
529 The variables which were indicated to be of importance and included within the 'best fit'  
530 cerebellum models were: home range size, gestation length, maximum lifespan and age at  
531 first reproduction. Also present within the subset of 'best fit' models were: different  
532 iterations of the previously mentioned variables and weaning age. After accounting for  
533 phylogeny, home range size was found to be significantly associated with cerebellum  
534 volume ( $P < 0.05$ ). Three of the life-history variables were significantly associated with  
535 cerebellum volume: gestation length, maximum lifespan and age at first reproduction ( $P$   
536  $< 0.05$ ,  $P < 0.01$ ,  $P < 0.001$ ). Although, home range size and gestation length ~~did~~ failed to  
537 find reach significance in certain model iterations ( $P = 0.08$ ,  $P = 0.07$ ). Weaning age also  
538 failed to find reach significance ( $P = 0.10$ ).

539

## 540 Discussion

541 ~~Using~~ Applying robust statistical analyses, a recently updated phylogenetic tree, ~~substantial~~  
542 ~~sample sizes~~ a comprehensive dataset, and models of varying complexity, the correlates of  
543 brain size in primates and carnivores were reconsidered. Consistent associations were found  
544 between brain size and ecological variables in primates, thus highlighting the influence of  
545 ecology on encephalisation. However, support was also found for the prominent social brain

546 hypothesis, ~~with the cerebellum appearing to be of importance for social intelligence,~~  
547 specifically revealing evidence for a link between whole brain volumes and two measures of  
548 sociality. In carnivores, data suggest ~~both~~ ecological ~~and social~~ variables shape brain size,  
549 suggesting alternative evolutionary patterns influencing carnivoran encephalisation. In both  
550 groups, life history variables appear crucial in counterbalancing the costs of producing and  
551 maintaining increased brain size, through extended developmental periods, reduced fertility  
552 and increased maximum lifespan.

### 553 **Primates**

554 Here, consistent with current literature, robust correlations were found between brain size  
555 and ecological variables. The most prominent of these were diet related; with dietary  
556 categories or dietary breadth appearing in all- 'best fit' models, for both whole brain and  
557 regional brain data. ~~The most prominent of these were diet related; diet being the most~~  
558 ~~consistent ecological correlate, with the relationship holding across multiple models, even~~  
559 ~~when using different brain size calculations.~~ These findings are similar to those of DeCasien  
560 et al., (20)(2017) and Powell et al., (14)(2017) who ~~both~~ found stronger and more consistent  
561 associations with ecological variables than those related to the social environment. Akin to  
562 the result of DeCasien et al. (20)(2017), ~~strong~~ support was found for- ~~omnivory~~ ~~frugivory~~, as  
563 well as ~~omnivory~~ ~~frugivory~~, as ~~key~~ correlates of brain size. However, in contrast with to the  
564 literature, here the correlations between regional brain volumes and dietary categories,  
565 were negatively correlated. This perhaps reflects both the need to sustain the energetic cost  
566 of brain tissue (highlighted by ~~Aiello & Wheeler, 1995~~-(115); (116)~~Fish & Lockwood, 2003~~),  
567 as well as meeting the cognitive foraging challenges imposed by ~~frugivorous and~~  
568 omnivorous and frugivorous diets (3)(~~Milton, 1981~~) ~~which ultimately leads to increased~~

Formatted: Font: Italic

569 ~~encephalisation.~~ In addition to the diet categories, dietary breadth was significantly  
570 (positively) correlated with ~~all whole brain measures~~whole brain volumes, further  
571 reinforcing the suggestion-proposition that diet influences brain size, whilst highlighting how  
572 useful this proxy can be in understanding how availability and variety of food sources can be  
573 important in setting the cognitive challenge. For example, MacLean et al. (50)~~(2014)~~ also  
574 suggested dietary breadth to be an important ecological correlate, with greater cognitive  
575 flexibility allowing individuals to explore and exploit new food sources, as well as use-deploy  
576 extractive foraging techniques. Evidence for associations between regional brain size  
577 volumes and home range size were also found ~~(see supplementary material)~~, supporting the  
578 view of Powell et al. ~~(2017)~~(14) in that certain dietary categories, such as frugivory, may  
579 covary with home range. Similar results were also found by Graber et al., (117)~~(2017)~~.  
580 ~~Interestingly, alongside the home range size associations found here, habitat variability was~~  
581 ~~negatively correlated with brain size, possibly suggesting there is also importance in the~~  
582 ~~habitat type used by a species.~~

583 In the past considerable support indicated that sociality was the major driver of  
584 encephalisation in primates. More recent works, however, conflict-with-contest this long-  
585 held viewpoint, failing to find support for a link between brain size and sociality measures  
586 (14, 19, 20, 50, 51)~~(Swanson et al., 2012; MacLean et al., 2014; van Schaik et al., 2016;~~  
587 ~~Powell et al., 2017; DeCasien et al., 2017)~~. Our findings, however, contrast with current  
588 research, confirming support for the social brain hypothesis. Here, our models revealed  
589 evidence of a link between brain size and sociality in primates. This association was present  
590 only in the whole brain 'best fit' models, with both variables reaching significance, indicating  
591 both increasing social group size and varying levels of social cohesion are influencing brain  
592 size in primates. ~~The most robust associations were those found in the cerebellum models,~~

Formatted: Font: Italic

593 ~~which is consistent with research that highlights the importance of the cerebellum in social~~  
594 ~~intelligence (Barton, 2012); however, further associations were also found (see~~  
595 ~~supplementary material).~~ Interestingly, use of the social cohesion proxy was mostly often  
596 preferred when comparing models, thereby suggesting the use of this proxy is superior  
597 when testing multiple ecological and social variables simultaneously. The inference too is  
598 that there may be greater importance in relationship quality, over quantity, as suggested by  
599 past research into primate sociality and pair-bonds (34, 45, 49, 95, 118) (~~Shultz & Dunbar,~~  
600 ~~2007, 2017; Layton & O'Hara, 2010; Silk, 2012; Bergman & Beehner, 2015~~). It is important ~~to~~  
601 to note however, that whilst there was support for this hypothesis, ecological models were  
602 preferable over social ones, and, ecological variables appear to be more robust correlates  
603 of brain size when compared to measures of sociality (see (117)).

604 Consistent with the literature, support was found for correlations between life-history  
605 variables and brain size. As suggested within the developmental cost (110) (~~Barton &~~  
606 ~~Capellini, 2011~~) and maternal energy (119) (~~Martin, 1996~~) hypotheses, relationships found  
607 possibly reflect the developmental costs associated with growing large brains, which appear  
608 to be bypassed through extended developmental periods and increased maternal  
609 investment (120, 121) (~~Heldstab et al., 2019; Isler & van Schaik, 2009~~). Similarly, Powell et al.  
610 (105) (~~2019~~) found correlations between neocortex volume brain volumes and gestation  
611 length, as well as cerebellum volume and juvenile period. Whilst the associations found here  
612 differ in terms of the specific regions involved, ~~Additionally, findings are consistent with the~~  
613 ~~expensive brain hypothesis (Isler & van Schaik, 2009), which proposes either an increase in~~  
614 ~~energy turnover or a reduction in energy allocation is needed in order to meet the costs of~~  
615 ~~increased brain size. This is seen here by the negative fertility correlation, suggesting a~~  
616 ~~reduction in reproductive output.~~ ~~†~~ This supports the theory as to why relatively large-

617 brained mammals often exhibit slow maturation times and reduced fertility; thus, by  
618 increasing developmental periods and maternal investment, primates possess these slow  
619 life histories which ultimately facilitates the production of big brains. This therefore makes  
620 the 'extended parenting' association critical to the evolution of cognition (90, 120, 122,  
621 123)(Isler & van Schaik, 2012; Heldstab et al., 2019, 2020; Uomini et al., 2020). However,  
622 one mystery still left to solve is the reasoning behind the association found here between  
623 brain size and maximum longevity. One proposition ~~suggests is that selection mechanisms~~  
624 ~~work towards counterbalancing mammals counterbalance~~the costs of large brains ~~in~~  
625 ~~mammals~~ with a longer reproductive lifespan (124)(González-Lagos et al., 2010), ~~and thus,~~  
626 ~~by extending the reproductive lifespan of a species, it counteracts the time and effort spent~~  
627 ~~producing and maintaining large brains, and aims to maximise the time species can spend~~  
628 ~~producing young, which in turn have large brains. Whereas others propose whilst others~~  
629 ~~propose~~the correlation is indirect and that a longer reproductive lifespan is a by-product of  
630 shifting developmental and maturation periods (105)(Powell et al., 2019).

### 631 **Carnivores**

632 ~~Akin to the primate results, herefor carnivores,~~ support is found for a link between regional  
633 ~~brain volumes and home range size in carnivores.~~ This relationship reached significance in  
634 ~~the cerebellum models, concurring with research suggesting this region is important for~~  
635 ~~spatial memory processing (1, 125, 126). Simply, larger home range sizes are thought to~~  
636 ~~require the use of complex information about food location and distribution (9), which for~~  
637 ~~example in carnivores, may represent the challenges of locating travelling herds of~~  
638 ~~herbivores. Alongside this association, indicating spatial demands influence brain size in~~  
639 ~~carnivores, dietary breadth was another ecological variable included within the 'best fit'~~

Formatted: Font: Italic

640 endocranial volume models. However, in contrast to the results of MacLean et al., (50) and  
641 Swanson et al., (19), the relationship between dietary breadth and brain size is negatively  
642 directed; suggesting greater dietary breadth is actually associated with smaller brain size in  
643 carnivores. Affirming the contemporary viewpoint, here, support is found for a link between  
644 brain size and diet in carnivores. However, in contrast to the results of MacLean et al.,  
645 (2014) and Swanson et al., (2012), the relationship between brain size and dietary breadth is  
646 negatively correlated; contradicting the assertion that dietary generalists possess larger  
647 brains and superior skillsets than those more specialised or with more limited food variety.  
648 For example, dietary generalists in birds have been found to show more technical  
649 innovations and possess larger brains when compared to dietary specialists (Ducatez, Clavel  
650 & Lefebvre, 2014; Shultz et al., 2005). Yet, our findings indicate greater dietary breadth is  
651 actually associated with smaller brain size in carnivores. This result could perhaps be a  
652 consequence of those species who are classified as obligate meat eaters, whose dietary  
653 breath is limited to one or two categories, thereby producing this negative correlation.  
654 Despite this, obligate meat-eating carnivores consume the highest caloric diet, which is  
655 thought to provide greater energy for producing large brains. This highlights how carnivores  
656 cannot simply be compared and likened to other mammalian orders, such as Primates, and  
657 suggests different evolutionary mechanisms at work in carnivoran lineages. It is important  
658 to note, however, that this association, whilst close to, failed to find reach significance (P =  
659 0.05), suggesting this relationship is not a strong influence on brain size in carnivores.  
660 Additional ecological associations were found specifically related to habitat variables (see  
661 supplementary material), with those associations suggesting spatial demands also influence  
662 carnivoran brain size.

663 Whilst previous work has suggested sociality plays a role in the evolution of brain size in  
664 carnivoran lineages (31, 33-35)(~~Holekamp et al., 2015; Shultz & Dunbar, 2007; Pérez-~~  
665 ~~Barbería et al., 2007; Dunbar & Bever, 1998~~), here, we find the relationship between brain  
666 size and sociality is negatively correlated~~no support for a link between measures of sociality~~  
667 and brain size in carnivores. Similarly, MacLean et al., (50)(~~2014~~), Benson-Amram et al.,  
668 (127)(~~2016~~), and Swanson et al., (~~2012~~)(19) found no support for the social brain hypothesis  
669 in mammals. The contrasting results present in the literature could be due to the fact that  
670 sociality appears to be limited to a select few carnivore taxa, specifically social species from  
671 the families Hyaenidae, Procyonidae and Felidae (128)(~~Sakai & Arsznov, 2020~~). This is  
672 suggested in the findings of Finarelli & Flynn (55)(~~2009~~), who identified that support for the  
673 SBH in Carnivora was dependent on data from Canidae, without which, no association is  
674 found. Thus, whilst sociality evidently plays an important role in primates, leading to  
675 complex, multi-faceted societies, this is less common in carnivore species, and therefore  
676 does not hold the same importance. ~~Interestingly, just as was found in the primate models,~~  
677 ~~the influence of sociality was restricted to the cerebellum, further suggesting it is this brain~~  
678 ~~region that is predominately underpinning the management of social interactions.~~  
679 Consistent with the previously discussed primate results, associations were found between  
680 life-history variables and brain size in carnivores. Age at first reproduction, gestation  
681 length and maximum lifespan were all found to positively correlate with regional brain  
682 volumes, suggesting both an increase in developmental periods as well as an extension in  
683 reproductive lifespans. Additionally, findings are consistent with the expensive brain  
684 hypothesis (121), which proposes either an increase in energy turnover or a reduction in  
685 energy allocation is needed in order to meet the costs of increased brain size. This is seen  
686 here by with a negative fertility correlation with between fertility and- endocranial volume,



687 ~~suggesting a reduction in reproductive output. most specifically the expensive brain~~  
688 ~~hypothesis (Isler & van Schaik, 2009), fertility, age at first reproduction and weaning age~~  
689 ~~were found to be negatively associated with brain size. This result reinforces support for the~~  
690 ~~aforementioned hypothesis, confirming the proposition that in order to develop and sustain~~  
691 ~~a large brain, there must be a trade-off with another expensive function, which in this case~~  
692 ~~is reproduction.~~ This, when paired with an increase in maternal investment and  
693 developmental periods, as suggested by ~~the aforementioned results~~ the primate results,  
694 bypasses the developmental constraints of producing a large brain through reduced fertility  
695 and slow maturation times.

#### 696 Whole versus regional brain volumes ~~Brain size confusion~~

697  
698 ~~Choosing the suitable body size correction factor for use in studies of brain evolution has~~  
699 ~~been highlighted as a complex problem (van Schaik et al., 2021; Swanson et al., 2012). The~~  
700 ~~disparity in results of comparative analyses of brain evolution could be in part the result of~~  
701 ~~the use of different correction measures. For example, earlier studies used residuals from~~  
702 ~~regression of brain size on body mass, whereas more recent studies are often scaled using~~  
703 ~~residuals from regression of brain size on another brain structure or are taken from ratios~~  
704 ~~(Deaner et al., 2000). The body size correction methods here produced similar outputs.~~  
705 ~~However, some differences were present; for example, in primates, the association between~~  
706 ~~habitat variability and EQ, which failed to remain present when using other methods. This~~  
707 ~~highlights numerous concerns. First, without the inclusion of this method, the association~~  
708 ~~would have been missed. Second, it raises questions regarding the validity of the~~  
709 ~~association. Without clarity regarding the most suitable correction measure, it is difficult to~~

710 ascertain which associations are 'true' correlates and which do not actually invoke  
711 influential change in brain evolution but are rather the consequence of inaccurate  
712 correction methods. This confusion regarding correction measures needs addressing, with  
713 the aim of determining the superior method, allowing greater clarity on past and current  
714 research whilst guiding future comparative analyses. For example, the fact that most  
715 carnivore models using residuals or other statistical calculations failed to be significant is  
716 noteworthy. Residuals appear to fail to appropriately account for body size in carnivores, or  
717 rather, as previously mentioned, brain estimates appear to be a poor representation of  
718 carnivoran brains due to the fact that carnivore brain size shows a lag relative to body size  
719 over evolutionary time (Swanson et al., 2012). Thus, inputting body size into a model as a  
720 covariate, rather than using any other brain estimate, appears most appropriate when  
721 designing comparative analyses of carnivoran brain evolution.

722 Our study highlights the benefit of investigating both whole brain and regional brain  
723 volumes. Whole brain volumes are often more readily available for species and thus by  
724 choosing to use this brain measure it increases sample sizes and commensurate statistical  
725 power. In addition, it has been argued the neocortex comprises a large proportion of whole  
726 brain volume, making the two brain volumes closely related (34, 95) (Shultz & Dunbar, 2007;  
727 Dunbar & Shultz, 2017). However, it is possible the inclusion of specific brain regions may  
728 uncover further associations that were not significant or present before. This was the case  
729 here, where for primates, the home range association only became significant in the  
730 neocortex and cerebellum models, and failed to have not reached significance in  
731 endocranial volume models. Additionally, in carnivores, many of the life-history  
732 associations, for example age at first reproduction, were only reached significance in the  
733 regional brain volume models. Therefore, without investigating specific brain regions, the

734 ~~influence of these associations would have been missed. This is the case here, where for~~  
735 ~~primates, social cohesion was close to significance in whole brain volume models but only~~  
736 ~~reached significance in the cerebellum models. Without including this brain region, the~~  
737 ~~influence of this association would have been missed.~~ In addition to this, the use of whole  
738 brain size does not necessarily allow the study of the ways in which different selective  
739 pressures act on different neural systems, as proposed by theories of mosaic evolution (5,  
740 61)(~~Barton & Harvey, 1995; Barton & Harvey, 2000~~). This often makes it difficult to relate  
741 whole brain size to individual selection pressures (129)(~~Healy & Rowe, 2007~~). ~~Therefore, by~~  
742 investigating specific brain regions, where [brain](#) data [and the corresponding covariates](#) are  
743 available, it allows the further analysis of how multiple functional systems can evolve in a  
744 mosaic fashion in response to different selection pressures.

## 745 **Conclusion**

746 To conclude, the evidence presented here supports the proposition that ecological variables  
747 hold greater influence in determining brain size in primate lineages. However, critical  
748 support is also found for the SBH in primates, confirming sociality does hold significance in  
749 encephalisation. ~~Ecological variables, most notably home range size, appear to shapeing~~  
750 ~~carnivoran brain size in carnivores. Yet no support is found there for measures of sociality,~~  
751 ~~indicating that sociality may not hold the same importance within thatis order. Multiple~~  
752 ~~variables appear to be shaping brain size in carnivores, including both ecological and social~~  
753 ~~variables, which requires greater investigation to unpick.~~ Life-history traits reveal evidence  
754 for the transition to slow life histories, which work toward facilitating the production of big  
755 brains and bypassing the cost of expensive brain tissue. ~~The use of different body size~~  
756 ~~correction methods is found to produce disparate results, which potentially hampers the~~

757 ~~validity of correlates of brain size, as without any indication of the most appropriate~~  
758 ~~measure, there is little clarity as to which associations reflect 'true' evolutionary influence.~~

759 Whilst data availability limits the application of comparative studies of brain evolution in  
760 many species, future studies should strive to integrate multiple variables, fully  
761 encompassing all the potential variables influencing brain size. In addition, where possible,  
762 researchers should investigate both whole brain and specific brain regions, as the inclusion  
763 of such may reveal further associations, capturing how different brain regions can evolve  
764 independently through varying selection pressures.

765

## 766 **Acknowledgements**

767 We thank Alex DeCasien for help regarding encephalisation quotients and model  
768 comparisons analyses. We are grateful to Eli Swanson for valuable discussions regarding  
769 PGLS analysis and for providing additional data analysis resources. Our thanks also to F.  
770 Sayol, O. Bertrand, V. Weisbecker, N. Emery, M. Tucker, D. Hinchcliffe, M. Olalla-Tárraga, S.  
771 Shultz, J. Gundry, C. O'Hara and C. Fauvelle. We are further grateful to the reviewers, whose  
772 thorough examinations led to a range of helpful suggestions that greatly assisted us in  
773 improving our ms.

774

775 **Data Accessibility:** All data supporting the findings of this study are available in the paper  
776 and the supplementary information.

777

778 **Author Contributions:** conceptualisation and methodology, HRC and SOH; investigation  
779 and data curation, HRC; formal analysis, HRC, SAH; supervision, SOH; project administration,  
780 HRC; visualisation and original draft, HRC, SOH; review and editing, HRC, SOH, SAH.

781

782 **Funding:** This research received no external funding

783 **Conflict of interest:** Authors declare no competing interests

784

## 785 **References**

- 786 ~~Aiello, L.C., Wheeler, P. (1995). The expensive-tissue hypothesis: the brain and the digestive~~  
787 ~~system in human and primate evolution. *Current Anthropology*, 36(2), 199-221. Doi:~~  
788 ~~10.1086/204350.~~
- 789 ~~Akaike, H. (1974). A new look at the statistical model identification. *IEEE Transactions on*~~  
790 ~~*Automatic Control*, 19(6), 716-723. Doi: 10.1109/TAC.1974.1100705.~~
- 791 ~~Barrickman, N.L., Bastian, M.L., Isler, K., van Schaik, C.P. (2008). Life history costs and~~  
792 ~~benefits of encephalization: a comparative test using data from long-term studies of~~  
793 ~~primates in the wild. *Journal of Human Evolution*, 54(5), 568-590. Doi:~~  
794 ~~10.1016/j.jhevol.2007.08.012.~~
- 795 ~~Barton, R.A. (2000). Primate brain evolution: cognitive demands of foraging or of social life?~~  
796 ~~In S. Boinski & P.A. Garber (Eds.), *On the Move: How and Why Animals Travel in Groups* (pp.~~  
797 ~~204-237). London: University of Chicago Press.~~
- 798 ~~Barton, R.A. (2002). How did brains evolve? *Nature*, 415, 134-135. Doi: 10.1038/415134a.~~

799 Barton, R.A. (2012). Embodied cognitive evolution and the cerebellum. *Philosophical*  
800 *Transactions of the Royal Society B: Biological Sciences*, 367(1599), 2097–2107. Doi:  
801 10.1098/rstb.2012.0112.

802 Barton, R.A., Capellini, I. (2011). Maternal investment, life histories, and the costs of brain  
803 growth in mammals. *PNAS*, 108(15), 6169–6174. Doi: 10.1073/pnas.1019140108.

804 Barton, R.A., Harvey, P. (2000). Mosaic evolution of brain structure in mammals. *Nature*,  
805 405, 1055–1058. Doi: 10.1038/35016580.

806 Barton, R.A., Purvis, A., Harvey, P.H. (1995). Evolutionary radiation of visual and olfactory  
807 brain systems in primates, bats and insectivores. *Philosophical Transactions of The Royal*  
808 *Society B: Biological Science*, 348(1326), 381–392. Doi: 10.1098/rstb.1995.0076.

809 Barton, R.A., Venditti, C. (2014). Rapid evolution of the cerebellum in humans and other  
810 great apes. *Current Biology*, 24(20), 2440–2444. Doi: 10.1016/j.cub.2014.08.056.

811 Benson-Amram, S., Dantzer, B., Stricker, G., Swanson, E.M., Holekamp, K.E. (2016). Brain size  
812 predicts problem-solving ability in mammalian carnivores. *PNAS*, 113(9), 2532–2537. Doi:  
813 10.1073/pnas.1505913113.

814 Bergman, T.J., Beehner, J.C. (2015). Measuring social complexity. *Animal Behaviour*, 103,  
815 203–209. Doi: 10.1016/j.anbehav.2015.02.018.

816 Bshary, R. (2011). Machiavellian intelligence in fishes. In C. Brown, K. Laland & J. Krause  
817 (Eds.), *Fish Cognition and Behavior* (pp. 277–297). Chichester: Blackwell Publishing Ltd.

818 Byrne, R.W., Bates, L.A. (2007). Brain evolution: when is a group not a group? *Current*  
819 *Biology*, 17(20), 883–884. Doi: 10.1016/j.cub.2007.08.018.

820 Byrne, R.W., Corp, N. (2004). Neocortex size predicts deception rate in primates.  
821 *Proceedings of the Royal Society B: Biological Sciences*, 271(1549), 1693–1699. Doi:  
822 10.1098/rspb.2004.2780.

823 Byrne, R.W., Whiten, A. (1988). *Machiavellian intelligence: social expertise and the evolution*  
824 *of intellect in monkeys, apes, and humans*. New York: Oxford University Press.

825 Cantania, K.C. (2004). Correlates and possible mechanisms of neocortical enlargement and  
826 diversification in mammals. *International Journal of Comparative Psychology*, 17(1), 71-91.

827 Clutton-Brock, T.H., Harvey, P.H. (1980). Primates, brains and ecology. *Journal of Zoology*,  
828 190(3), 309-323. Doi: 10.1111/j.1469-7998.1980.tb01430.x.

829 Deaner, R.O., Isler, K., Burkart, J., van Schaik, C.P. (2007). Overall brain size, and not  
830 encephalization quotient, best predicts cognitive ability across non-human primates. *Brain,*  
831 *Behavior and Evolution*, 70(2), 115-124. Doi: 10.1159/000102973.

832 Deaner, R.O., Nunn, C.L., van Schaik, C.P. (2000). Comparative tests of primate cognition:  
833 different scaling methods produce different results. *Brain, Behavior and Evolution*, 55(1), 44-  
834 52. Doi: 10.1159/000006641.

835 DeCasien, A.R., Higham, J.P. (2019). Primate mosaic brain evolution reflects selection on  
836 sensory and cognitive specialization. *Nature Ecology & Evolution*, 3(10), 1483-1493. Doi:  
837 10.1038/s41559-019-0969-0.

838 DeCasien, A.R., Thompson, N.A., Williams, S.A., Shattuck, M.R. (2018). Encephalization and  
839 longevity evolved in a correlated fashion in Euarchontoglires but not in other mammals.  
840 *Evolution*, 72(12), 2617-2631. Doi: 10.1111/evo.13633.

841 DeCasien, A.R., Williams, S.A., Higham, J.P. (2017). Primate brain size is predicted by diet but  
842 not sociality. *Nature Ecology & Evolution*, 1(0112), 1-7. Doi: 10.1038/s41559-017-0112.

843 Ducatez, S., Clavel, J., Lefebvre, L. (2014). Ecological generalism and behavioural innovation  
844 in birds: technical intelligence or the simple incorporation of new foods? *Journal of Animal*  
845 *Ecology*, 84(1), 79-89. Doi: 10.1111/1365-2656.12255.

846 Dunbar, R.I.M. (1992). Neocortex size as a constraint on group size in primates. *Journal of*  
847 *Human Evolution*, 22(6), 469–493. Doi: 10.1016/0047-2484(92)90081-J.

848 Dunbar, R.I.M. (1998). The social brain hypothesis. *Evolutionary Anthropology*, 6(5), 178–  
849 190. Doi: 10.1002/(SICI)1520-6505(1998)6:5<178::AID-EVAN5>3.0.CO;2-8.

850 Dunbar, R.I.M. (2009). The social brain hypothesis and its implications for social evolution.  
851 *Annals of Human Biology*, 36(5), 562–572. Doi: 10.1080/03014460902960289.

852 Dunbar, R.I.M., Bever, J. (1998). Neocortex size predicts group size in carnivores and some  
853 insectivores. *Ethology*, 104(8), 695–708. Doi: 10.1111/j.1439-0310.1998.tb00103.x.

854 Dunbar, R.I.M., Shultz, S. (2007a). Evolution in the social brain. *Science*, 317(5843), 1344–  
855 1347. Doi: 10.1126/science.1145463.

856 Dunbar, R.I.M., Shultz, S. (2007b). Understanding primate brain evolution. *Philosophical*  
857 *Transactions of the Royal Society B: Biological Sciences*, 362(1480), 649–658. Doi:  
858 10.1098/rstb.2006.2001.

859 Dunbar, R.I.M., Shultz, S. (2017). Why are there so many explanations for primate brain  
860 evolution? *Philosophical Transactions of the Royal Society B: Biological Sciences*, 372(1727),  
861 20160244. Doi: 10.1098/rstb.2016.0244.

862 Emery, N.J., Seed, A.M., von Bayern, A.M.P., Clayton, N.S. (2007). Cognitive adaptations of  
863 social bonding in birds. *Philosophical Transactions of the Royal Society B: Biological Sciences*,  
864 362(1480), 489–505. Doi: 10.1098/rstb.2006.1991.

865 Fernandes, H.B.F., Peñaherrera-Aguirre, M., Woodley of Menie, M.A., Figueredo, A.J. (2020).  
866 Macroevolutionary patterns and selection modes for general intelligence (G) and for  
867 commonly used neuroanatomical volume measures in primates. *Intelligence*, 80, 101456.  
868 Doi: 10.1016/j.intell.2020.101456.



869 Finarelli, J.A., Flynn, J.J. (2009). Brain size evolution and sociality in Carnivora. *PNAS*,  
870 *106*(23), 9345–9349. Doi: 10.1073/pnas.0901780106.

871 Finlay, B.L., Darlington, R.B. (1995). Linked regularities in the development and evolution of  
872 mammalian brains. *Science*, *268*(5217), 1578–1584. Doi: 10.1126/science.7777856.

873 Finlay, B.L., Darlington, R.B., Nicastro, N. (2001). Developmental structure in brain evolution.  
874 *Behavioral and Brain Sciences*, *24*(2), 263–278. Doi: 10.1017/S0140525X01003958.

875 Fish, J.L., Lockwood, C.A. (2003). Dietary constraints on encephalization in primates.  
876 *American Journal of Physical Anthropology*, *120*(2), 171–181. Doi: 10.1002/ajpa.10136.

877 Freckleton, R.P. (2002). On the misuse of residuals in ecology: regression of residuals vs.  
878 multiple regression. *Journal of Animal Ecology*, *71*(3), 542–545. Doi: 10.1046/j.1365-  
879 2656.2002.00618.x.

880 Gibson, K.R. (1986). Cognition, brain size and the extraction of embedded food resources. In  
881 J.G. Else & P.C. Lee (Eds.), *Primate ontogeny, cognition and social behaviour* (pp. 93–103).  
882 Cambridge: Cambridge University Press.

883 González-Lagos, C., Sol, D., Reader, S.M. (2010). Large-brained mammals live longer. *Journal*  
884 *of Evolutionary Biology*, *23*(5), 1064–1074. Doi: 10.1111/j.1420-9101.2010.01976.x.

885 Gonzalez Voyer, A., Winberg, S., Kolm, N. (2008). Social fishes and single mothers: brain  
886 evolution in African cichlids. *Proceedings of the Royal Society B: Biological Sciences*,  
887 *276*(1654), 161–167. Doi: 10.1098/rspb.2008.0979.

888 Graber, M.S. (2017). *Social and ecological aspects of brain size evolution: a comparative*  
889 *approach* (PhD Thesis). University of Zurich, Zurich. Retrieved from:  
890 <https://www.zora.uzh.ch/id/eprint/146749/>.

891 Healy, S.D., Rowe, C. (2007). A critique of comparative studies of brain size. *Proceedings of*  
892 *the Royal Society B: Biological Sciences*, *274*(1609), 453–464. Doi: 10.1098/rspb.2006.3748.

893 Heldstab, S.A., Isler, K., Burkart, J.M., van Schaik, C.P. (2019). Allomaternal care, brains and  
894 fertility in mammals: who cares matters. *Behavioural Ecology and Sociobiology*, 73(6), 71.  
895 Doi: 10.1007/s00265-019-2684-x.

896 Heldstab, S.A., Isler, K., Schuppli, C., van Schaik, C.P. (2020). When ontogeny recapitulates  
897 phylogeny: Fixed neurodevelopmental sequence of manipulative skills among primates.  
898 *Science Advances*, 6(30), eabb4685. Doi: 10.1126/sciadv.abb4685.

899 Heldstab, S.A., Kosonen, Z.K., Koski, S.E., Burkart, J.M., van Schaik, C.P., Isler, K. (2016).  
900 Manipulation complexity in primates coevolved with brain size and terrestriality. *Scientific  
901 Reports*, 6, 24528. Doi: 10.1038/srep24528.

902 Holekamp, K.E. (2007). Questioning the social intelligence hypothesis. *Trends in Cognitive  
903 Sciences*, 11(2), 65-69. Doi: 10.1016/j.tics.2006.11.003.

904 Holekamp, K.E., Benson-Amram, S. (2017). The evolution of intelligence in mammalian  
905 carnivores. *Interface Focus*, 7(3), 20160108. Doi: 10.1098/rsfs.2016.0108.

906 Holekamp, K.E., Dantzer, B., Stricker, G., Shaw-Yoshida, K.C., Benson-Amram, S. (2015).  
907 Brains, brawn and sociality: a hyaena's tale. *Animal Behaviour*, 103, 237-248. Doi:  
908 10.1016/j.anbehav.2015.01.023.

909 Innocenti, G.M., Kaas, J.H. (1995). The cortex. *Trends in Neurosciences*, 18, 371-372.

910 Isler, K., van Schaik, C.P. (2014). How humans evolved large brains: comparative evidence.  
911 *Evolutionary Anthropology*, 23(2), 65-75. Doi: 10.1002/evan.21403.

912 Isler, K., Kirk, C.E., Miller, J.M.A., Albrecht, G.A., Gelvin, B.R., Martin, R.D. (2008). Endocranial  
913 volumes of primate species: scaling analyses using a comprehensive and reliable data set.  
914 *Journal of Human Evolution*, 55(6), 967-978. Doi: 10.1016/j.jhevol.2008.08.004.

915 Isler, K., van Schaik, C.P. (2009). The expensive brain: a framework for explaining  
916 evolutionary changes in brain size. *Journal of Human Evolution*, 57(4), 392-400. Doi:  
917 10.1016/j.jhevol.2009.04.009.

918 Isler, K., van Schaik, C.P. (2012). Allomaternal care, life history and brain size evolution in  
919 mammals. *Journal of Human Evolution*, 63(1), 52-63. Doi: 10.1016/j.jhevol.2012.03.009.

920 IUCN Red List. (2020). The IUCN Red List of Threatened Species. Retrieved from:  
921 <https://www.iucnredlist.org/>.

922 Jerison, H.J. (1973). *Evolution of the brain and intelligence*. Academic Press: New York.

923 Kaas, J.H. (1995). The evolution of isocortex. *Brain, Behavior and Evolution*, 46, 187-196. Doi:  
924 10.1159/000113273.

925 Kudo, H., Dunbar, R.I.M. (2001). Neocortex size and social network size in primates. *Animal*  
926 *Behaviour*, 62(4), 711-722. Doi: 10.1006/anbe.2001.1808.

927 Layton, R.A., O'Hara, S.J. (2010). Human social evolution: a comparison of hunter-gatherer  
928 and chimpanzee social organisation. In R. Dunbar, C. Gamble & J. Gowlett (Eds.), *Social*  
929 *brain, distributed mind* (pp. 85-115). Oxford: British Academy.

930 MacLean, E.L., Hare, B., Nunn, C.L., Addessi, E., Amici, F., Anderson, R.C. ... Zhao, Y. (2014).  
931 The evolution of self-control. *PNAS*, 111(20), E2140-E2148. Doi: 10.1073/pnas.1323533111.

932 Martin, R.D. (1996). Scaling of the mammalian brain: the maternal energy hypothesis.  
933 *Physiology*, 11(4), 149-156. Doi: 10.1152/physiologyonline.1996.11.4.149.

934 Milton, K. (1981). Distribution patterns of tropical plant foods as an evolutionary stimulus to  
935 primate mental development. *American Anthropologist*, 83(3), 534-548. Doi:  
936 10.1525/aa.1981.83.3.02a00020.

937 Parker, S.T. (2015). Re-evaluating the extractive foraging hypothesis. *New Ideas in*  
938 *Psychology*, 37, 1-12. Doi: 10.1016/j.newideapsych.2014.11.001.

939 Parker, S.T., Gibson, K.R. (1977). Object manipulation, tool use and sensorimotor  
940 intelligence as feeding adaptations in cebus monkeys and great apes. *Journal of Human*  
941 *Evolution*, 6(7), 623-641. Doi: 10.1016/S0047-2484(77)80135-8.

942 Pérez-Barbería, F.J., Gordon, I.J. (2005). Gregariousness increases brain size in ungulates.  
943 *Oecologia*, 145(1), 41-52. Doi: 10.1007/s00442-005-0067-7.

944 Pérez-Barbería, F.J., Shultz, S., Dunbar, R.I.M. (2007). Evidence for coevolution of sociality  
945 and relative brain size in three orders of mammals. *Evolution*, 61(12), 2811-2821. Doi:  
946 10.1111/j.1558-5646.2007.00229.x.

947 Plante, S., Colchero, F., Calme, S. (2014). Foraging strategy of a neotropical primate: how  
948 intrinsic and extrinsic factors influence destination and residence time. *Journal of Animal*  
949 *Ecology*, 83, 116-125. Doi: 10.1111/1365-2656.12119.

950 Powell, J., Lewis, P.A., Roberts, N., García-Fiñana, M., Dunbar, R.I.M. (2012). Orbital  
951 prefrontal cortex volume predicts social network size: an imaging study of individual  
952 differences in humans. *Proceedings of the Royal Society B: Biological Sciences*, 279(1736),  
953 2157-2162. Doi: 10.1098/rspb.2011.2574.

954 Powell, L.E., Barton, R.A., Street, S.E. (2019). Maternal investment, life histories and the  
955 evolution of brain structure in primates. *Proceedings of the Royal Society B: Biological*  
956 *Sciences*, 286(1911), 20191608. Doi: 10.1098/rspb.2019.1608.

957 Powell, L.E., Isler, K., Barton, R.A. (2017). Re-evaluating the link between brain size and  
958 behavioural ecology in primates. *Proceedings of the Royal Society B: Biological Sciences*,  
959 284(1865), 20171765. Doi: 10.1098/rspb.2017.1765.

960 Reader, S.M., Hager, Y., Laland, K.N. (2011). The evolution of primate general and cultural  
961 intelligence. *Philosophical Transactions of the Royal Society B: Biological Sciences*,  
962 366(1567), 1017-1027. Doi: 10.1098/rstb.2010.0342.

963 Sakai, S.T., Arsznov, B.M. (2020). Carnivoran brains: effects of sociality on inter and  
964 intraspecific comparisons of regional brain volumes. In J.H. Kaas (Ed.), *Evolutionary*  
965 *Neuroscience* (pp. 463-479). London: Academic Press.

966 Sakai, S.T., Arsznov, B.M., Hristova, A.E., Yoon, E.J., Lundrigan, B.L. (2016). Big cat coalitions:  
967 a comparative analysis of regional brain volumes in felidae. *Frontiers in Neuroanatomy*, *10*,  
968 *99*. Doi: [10.3389/fnana.2016.00099](https://doi.org/10.3389/fnana.2016.00099).

969 Sakai, S.T., Arsznov, B.M., Lundrigan, B.L., Holekamp, K.E. (2011). Brain size and social  
970 complexity: a computed tomography study in hyaenidae. *Brain, Behavior and Evolution*,  
971 *77*(2), 91-104. Doi: [10.1159/000323849](https://doi.org/10.1159/000323849).

972 Sallet, J., Mars, R.B., Noonan, M.P., Andersson, J.L., O'Reilly, J.X., Jbabdi, S., ... Rushworth,  
973 M.F.S. (2011). Social network size affects neural circuits in macaques. *Science*, *334*(6056),  
974 *697-700*. Doi: [10.1126/science.1210027](https://doi.org/10.1126/science.1210027).

975 Scheiber, I.B.R., Weib, B.M., Hirschenhauser, K., Wascher, C.A.F., Nedelcu, I.T., Kotrschal, K.  
976 (2008). Does 'relationship intelligence' make big brains in birds? *The Open Biology Journal*,  
977 *1*, 6-8. Doi: [10.2174/1874196700801010006](https://doi.org/10.2174/1874196700801010006).

978 Shultz, S., Dunbar, R.I.M. (2006). Both social and ecological factors predict ungulate brain  
979 size. *Proceedings of the Royal Society B: Biological Sciences*, *273*(1583), 207-215. Doi:  
980 [10.1098/rspb.2005.3283](https://doi.org/10.1098/rspb.2005.3283).

981 Shultz, S., Dunbar, R.I.M. (2010). Encephalization is not a universal macroevolutionary  
982 phenomenon in mammals but is associated with sociality. *PNAS*, *107*(50), 21582-21586. Doi:  
983 [10.1073/pnas.1005246107](https://doi.org/10.1073/pnas.1005246107).

984 Shultz, S., Bradbury, R.B., Evans, K.L., Gregory, R.D., Blackburn, T.M. (2005). Brain size and  
985 resource specialization predict long-term population trends in British birds. *Proceedings of*

986 *the Royal Society B: Biological Sciences*, 272(1578), 2305-2311. Doi:  
987 10.1098/rspb.2005.3250.

988 Shultz, S., Dunbar, R.I.M. (2007). The evolution of the social brain: anthropoid primates  
989 contrast with other vertebrates. *Proceedings of the Royal Society B: Biological Sciences*, 274,  
990 2429-2436. Doi: 10.1098/rspb.2007.0693.

991 Shultz, S., Dunbar, R.I.M. (2010). Social bonds in birds are associated with brain size and  
992 contingent on the correlated evolution of life history and increased parental investment.  
993 *Biological Journal of the Linnean Society*, 100(1), 111-123. Doi: 10.1111/j.1095-  
994 8312.2010.01427.x.

995 Silk, J.B. (2012). The adaptive value of sociality. In J. C. Mitani et al. (Eds.), *The Evolution of*  
996 *Primate Societies* (pp. 552-564). Chicago: The University of Chicago Press.

997 Smaers, J.B., Dechmann, D.K.N., Goswami, A., Soligo, C., Safi, K. (2012). Comparative  
998 analyses of evolutionary rates reveal different pathways to encephalization in bats,  
999 carnivorans, and primates. *PNAS*, 109(44), 18006-18011. Doi: 10.1073/pnas.1212181109.

1000 Smaers, J.B., Turner, A.H., Gomez-Robles, A., Sherwood, C.C. (2018). A cerebellar substrate  
1001 for cognition evolved multiple times independently in mammals. *eLife*, 7, e35696. Doi:  
1002 10.7554/eLife.35696.

1003 Smaers, J.B., Vanier, D.R. (2019). Brain size expansion in primates and humans is explained  
1004 by a selective modular expansion of the cortico-cerebellar system. *Cortex*, 118, 292-305.  
1005 Doi: 10.1016/j.cortex.2019.04.023.

1006 Sol, D., Duncan, R.P., Blackburn, T.M., Cassey, P., Lefebvre, L. (2005). Big brains, enhanced  
1007 cognition, and response of birds to novel environments. *PNAS*, 105(15), 5460-5465. Doi:  
1008 10.1073/pnas.0408145102.

1009 Stankowich, T., Haverkamp, P.J., Caro, T. (2014). Ecological drivers of antipredator defences  
1010 in carnivores. *Evolution*, 68(5), 1415-1425. Doi: 10.1111/evo.12356.

1011 Street, S.E., Navarrete, A.F., Reader, S.M., Laland, K.N. (2017). Coevolution of cultural  
1012 intelligence, extended life history, sociality, and brain size in primates. *PNAS*, 114(30), 7908-  
1013 7914. Doi: 10.1073/pnas.1620734114.

1014 Swanson, E.M., Holekamp, K.E., Lundrigan, B.L., Arsznov, B.M., Sakai, S.T. (2012). Multiple  
1015 determinants of whole and regional brain volume among terrestrial carnivorans. *PLoS ONE*,  
1016 7(6), e38447. Doi: 10.1371/journal.pone.0038447.

1017 Triki, Z., Levorato, E., McNeely, W., Marshall, J., Bshary, R. (2019). Population densities  
1018 predict forebrain size variation in the cleaner fish *Labroides dimidiatus*. *Proceedings of the*  
1019 *Royal Society B: Biological Sciences*, 286(1915), 20192108.

1020 Uomini, N., Fairlie, J., Gray, R.D., Griesser, M. (2020). Extended parenting and the evolution  
1021 of cognition. *Philosophical Transactions of the Royal Society B: Biological Sciences*,  
1022 375(1803), 20190495. Doi: 10.1098/rstb.2019.0495.

1023 Upham, N.S., Esselstyn, J.A., Jetz, W. (2019). Inferring the mammal tree: species-level sets of  
1024 phylogenies for questions in ecology, evolution, and conservation. *PLoS Biology*, 17(12),  
1025 e3000494. Doi: 10.1371/journal.pbio.3000494.

1026 van Schaik, C.P., Triki, Z., Bshary, R., Heldstab, S.A. (2021). A farewell to EQ: A new brain size  
1027 measure for comparative primate cognition. *bioRxiv*. Doi: 10.1101/2021.02.15.431238.

1028 van Schaik, C.P., Deaner, R.O. (2003). Life history and cognitive evolution in primates. In F.  
1029 de Waal & P.L. Tyack (Eds.), *Animal Social Complexity: Intelligence, Culture, and*  
1030 *Individualized Societies* (pp. 5-25). Cambridge: Harvard University Press.

1031 van Schaik, C.P., Graber, S.M., Schuppli, C., Heldstab, S.A., Isler, K. (2016). Brain size  
 1032 evolution in primates—testing effects of social vs. ecological complexity. *American Journal of*  
 1033 *Physical Anthropology*, 159, 321–321.

1034 van Schaik, C.P., Isler, K., Burkart, J.M. (2012). Explaining brain size variation: from social to  
 1035 cultural brain. *Trends in Cognitive Sciences*, 16(5), 277–284. Doi: 10.1016/j.tics.2012.04.004.

1036 van Woerden, J.T., van Schaik, C.P., Isler, K. (2010). Effects of seasonality on brain size  
 1037 evolution: evidence from strepsirrhine primates. *The American Naturalist*, 176(6), 758–767.  
 1038 Doi: 10.1086/657045.

1039 Walker, R., Burger, O., Wagner, J., Von Rueden, C.R. (2006). Evolution of brain size and  
 1040 juvenile periods in primates. *Journal of Human Evolution*, 51(5), 480–489. Doi:  
 1041 10.1016/j.jhevol.2006.06.002.

1042 Weisbecker, V., Goswami, A. (2010). Brain size, life history, and metabolism at the  
 1043 marsupial/placental dichotomy. *PNAS*, 107(37), 16216–16221. Doi:  
 1044 10.1073/pnas.0906486107.

1045 Wilman, H., Belmarker, J., Simpson, J., de la Rosa, C., Rivadeneira, M.M., Jetz, W. (2014).  
 1046 EltonTraits 1.0: species-level foraging attributes of the world's birds and mammals. *Ecology*,  
 1047 95(7), 2027. Doi: 10.1890/13-1917.1.

1048

1049 ▲

1050

1051 1. Barton RA. Embodied cognitive evolution and the cerebellum. *Philos Trans R Soc B*.  
 1052 2012;367(1599):2097-107.

1053 2. Parker ST, Gibson KR. Object manipulation, tool use and sensorimotor intelligence as  
 1054 feeding adaptations in cebus monkeys and great apes. *J Hum Evol*. 1977;6(7):623-41.

Formatted: Font: 12 pt

Formatted: Font: (Default) +Body (Calibri), 12 pt

Formatted: Line spacing: Double



- 1055 3. Milton K. Distribution patterns of tropical plant foods as an evolutionary stimulus to  
1056 primate mental development. *Am Anthropol.* 1981;83(3):534-48.
- 1057 4. Mace GM, Harvey PH, Clutton-Brock TH. Brain size and ecology in small mammals. *J*  
1058 *Zool.* 1981;193(3):333-54.
- 1059 5. Barton RA, Purvis A, Harvey PH. Evolutionary radiation of visual and olfactory brain  
1060 systems in primates, bats and insectivores. *Philos Trans R Soc B.* 1995;348(1326):381-92.
- 1061 6. Hutcheon JM, Kirsch JAW, Garland Jr T. A comparative analysis of brain size in  
1062 relation to foraging ecology and phylogeny in the chiroptera. *Brain Behav Evol.*  
1063 2002;60(3):165-80.
- 1064 7. Winkler H, Leisler B, Bernroider G. Ecological constraints on the evolution of avian  
1065 brains. *J Ornithol.* 2004;145(3):238-44.
- 1066 8. Harvey PH, Clutton-Brock TH, Mace GM. Brain size and ecology in small mammals  
1067 and primates. *PNAS.* 1980;77(7):4387-9.
- 1068 9. Clutton-Brock TH, Harvey PH. Primates, brains and ecology. *J Zool.* 1980;190(3):309-  
1069 23.
- 1070 10. Bernard RTF, Nurton J. Ecological correlates of relative brain size in some south  
1071 african rodents. *S Afr J Zool.* 1993;28(2):95-8.
- 1072 11. Barton RA. Primate brain evolution: cognitive demands of foraging or of social life?  
1073 In: Boinski S, Garber PA, editors. *On the move: how and why animals travel in groups.*  
1074 London: The University of Chicago Press; 2000. p. 204-37.
- 1075 12. Heldstab SA, Kosonen ZK, Koski SE, Burkart JM, van Schaik CP, Isler K. Manipulation  
1076 complexity in primates coevolved with brain size and terrestriality. *Sci Rep.* 2016;6:24528.
- 1077 13. Parker ST. Re-evaluating the extractive foraging hypothesis. *New Ideas Psychol.*  
1078 2015;37:1-12.

- 1079 14. Powell LE, Isler K, Barton RA. Re-evaluating the link between brain size and  
1080 behavioural ecology in primates. *Proc R Soc B*. 2017;284(1865):20171765.
- 1081 15. Milton K, May ML. Body weight, diet and home range area in primates. *Nature*.  
1082 1976;259(5543):459-62.
- 1083 16. Walker R, Burger O, Wagner J, Von Rueden CR. Evolution of brain size and juvenile  
1084 periods in primates. *J Hum Evol*. 2006;51(5):480-9.
- 1085 17. Ratcliffe JM. Neuroecology and diet selection in phyllostomid bats. *Behav Process*.  
1086 2009;80(3):247-51.
- 1087 18. van Woerden JT, van Schaik CP, Isler K. Effects of seasonality on brain size evolution:  
1088 evidence from strepsirrhine primates. *Am Nat*. 2010;176(6):758-67.
- 1089 19. Swanson EM, Holekamp KE, Lundrigan BL, Arsznov BM, Sakai ST. Multiple  
1090 determinants of whole and regional brain volume among terrestrial carnivorans. *PLoS One*.  
1091 2012;7(6):e38447.
- 1092 20. DeCasien AR, Williams SA, Higham JP. Primate brain size is predicted by diet but not  
1093 sociality. *Nat Ecol Evol*. 2017;1(5):0112.
- 1094 21. Gibson KR. Cognition, brain size and the extraction of embedded food resources. In:  
1095 Lee PC, Else JG, editors. *Primate ontogeny, cognition and social behaviour*. Cambridge:  
1096 Cambridge University Press; 1986. p. 93-103.
- 1097 22. Reader SM, Hager Y, Laland KN. The evolution of primate general and cultural  
1098 intelligence. *Philos Trans R Soc B*. 2011;366(1567):1017-27.
- 1099 23. Plante S, Colchero F, Calmé S. Foraging strategy of a neotropical primate: how  
1100 intrinsic and extrinsic factors influence destination and residence time. *J Anim Ecol*.  
1101 2014;83(1):116-25.

- 1102 24. Sol D, Duncan R, Blackburn T, Cassey P, Lefebvre L. Big brains, enhanced cognition,  
1103 and response of birds to novel environments. PNAS. 2005;102:5460-5.
- 1104 25. Whiten A, Byrne RW. Tactical deception in primates. Behav Brain Sci.  
1105 1988;11(2):233-73.
- 1106 26. Dunbar RIM. The social brain hypothesis. Evol Anthropol. 1998;6(5):178-90.
- 1107 27. Dunbar RIM. The social brain hypothesis and its implications for social evolution. Ann  
1108 Hum Biol. 2009;36(5):562-72.
- 1109 28. Dunbar RIM. Neocortex size as a constraint on group size in primates. J Hum Evol.  
1110 1992;22(6):469-93.
- 1111 29. Byrne RW, Corp N. Neocortex size predicts deception rate in primates. Proc R Soc B.  
1112 2004;271(1549):1693-9.
- 1113 30. Kudo H, Dunbar RIM. Neocortex size and social network size in primates. Anim  
1114 Behav. 2001;62(4):711-22.
- 1115 31. Holekamp KE, Dantzer B, Stricker G, Shaw Yoshida KC, Benson-Amram S. Brains,  
1116 brawn and sociality: a hyaena's tale. Anim Behav. 2015;103:237-48.
- 1117 32. Sakai ST, Arsznov BM, Lundrigan BL, Holekamp KE. Brain size and social complexity: a  
1118 computed tomography study in hyaenidae. Brain Behav Evol. 2011;77(2):91-104.
- 1119 33. Dunbar RIM, Bever J. Neocortex size predicts group size in carnivores and some  
1120 insectivores. Ethology. 1998;104(8):695-708.
- 1121 34. Shultz S, Dunbar RIM. The evolution of the social brain: anthropoid primates contrast  
1122 with other vertebrates. Proc R Soc B. 2007;274(1624):2429-36.
- 1123 35. Pérez-Barbería FJ, Shultz S, Dunbar RIM. Evidence for coevolution of sociality and  
1124 relative brain size in three orders of mammals. Evolution. 2007;61(12):2811-21.

- 1125 36. Perez-Barberia FJ, Gordon IJ. Gregariousness increases brain size in ungulates.  
1126 *Oecologia*. 2005;145(1):41-52.
- 1127 37. Shultz S, Dunbar RIM. Both social and ecological factors predict ungulate brain size.  
1128 *Proc R Soc B*. 2006;273(1583):207-15.
- 1129 38. Emery N, Seed A, von Bayern A, Clayton N. Cognitive adaptations of social bonding in  
1130 birds. *Philos Trans R Soc B*. 2007;362:489-505.
- 1131 39. Scheiber IB, Weiß BM, Hirschenhauser K, Wascher CA, Nedelcu IT, Kotrschal K. Does  
1132 'relationship intelligence' make big brains in birds? *Open Biol*. 2008;1:6-8.
- 1133 40. Shultz S, Dunbar RIM. Social bonds in birds are associated with brain size and  
1134 contingent on the correlated evolution of life-history and increased parental investment.  
1135 *Biol J Linn Soc*. 2010;100(1):111-23.
- 1136 41. Gonzalez-Voyer A, Winberg S, Kolm N. Social fishes and single mothers: brain  
1137 evolution in african cichlids. *Proc R Soc B*. 2009;276(1654):161-7.
- 1138 42. Bshary R. Machiavellian intelligence in fishes. In: Brown C, Laland KN, Krause J,  
1139 editors. *Fish cognition and behavior*. Chichester: Blackwell Publishing Ltd; 2011.
- 1140 43. Triki Z, Levorato E, McNeely W, Marshall J, Bshary R. Population densities predict  
1141 forebrain size variation in the cleaner fish *Labroides dimidiatus*. *Proc R Soc B*.  
1142 2019;286(1915):20192108.
- 1143 44. Byrne RW, Bates Lucy A. Brain evolution: when is a group not a group? *Curr Biol*.  
1144 2007;17(20):R883-R4.
- 1145 45. Bergman TJ, Beehner JC. Measuring social complexity. *Anim Behav*. 2015;103:203-9.
- 1146 46. Schillaci MA. Sexual selection and the evolution of brain size in primates. *PLoS One*.  
1147 2006;1(1):e62.

- 1148 47. Schillaci MA. Primate mating systems and the evolution of neocortex size. *J Mammal.*  
1149 2008;89(1):58-63.
- 1150 48. MacLean EL, Barrickman NL, Johnson EM, Wall CE. Sociality, ecology, and relative  
1151 brain size in lemurs. *J Hum Evol.* 2009;56(5):471-8.
- 1152 49. Silk JB. The evolution of primate societies. In: John CM, Josep C, Peter MK, Ryne AP,  
1153 Joan BS, editors. *The adaptive value of sociality: University of Chicago Press; 2012.* p. 552-  
1154 64.
- 1155 50. MacLean EL, Hare B, Nunn CL, Addessi E, Amici F, Anderson RC, et al. The evolution  
1156 of self-control. *PNAS.* 2014;111(20):E2140-8.
- 1157 51. van Schaik C, Graber SM, Schuppli C, Heldstab SA, Isler K. Brain size evolution in  
1158 primates-testing effects of social vs. ecological complexity. *Am J Phys Anthropol.*  
1159 2016;159:321-.
- 1160 52. Holekamp KE, Benson-Amram S. The evolution of intelligence in mammalian  
1161 carnivores. *Interface Focus.* 2017;7(3):20160108.
- 1162 53. Holekamp KE. Questioning the social intelligence hypothesis. *Trends Cogn Sci.*  
1163 2007;11(2):65-9.
- 1164 54. van Schaik CP, Isler K, Burkart JM. Explaining brain size variation: from social to  
1165 cultural brain. *Trends Cogn Sci.* 2012;16(5):277-84.
- 1166 55. Finarelli JA, Flynn JJ. Brain-size evolution and sociality in carnivora. *PNAS.*  
1167 2009;106(23):9345-9.
- 1168 56. Jerison HJ. *Evolution of the brain and intelligence.* New York: Academic Press; 1973.
- 1169 57. Deaner RO, Isler K, Burkart J, van Schaik C. Overall brain size, and not encephalization  
1170 quotient, best predicts cognitive ability across non-human primates. *Brain Behav Evol.*  
1171 2007;70(2):115-24.

- 1172 58. Shultz S, Dunbar R. Encephalization is not a universal macroevolutionary  
1173 phenomenon in mammals but is associated with sociality. *PNAS*. 2010;107(50):21582-6.
- 1174 59. Freckleton RP. On the misuse of residuals in ecology: regression of residuals vs.  
1175 multiple regression. *J Anim Ecol*. 2002;71(3):542-5.
- 1176 60. Freckleton RP. The seven deadly sins of comparative analysis. *J Evol Biol*.  
1177 2009;22(7):1367-75.
- 1178 61. Barton RA, Harvey PH. Mosaic evolution of brain structure in mammals. *Nature*.  
1179 2000;405(6790):1055-8.
- 1180 62. Deaner RO, Nunn CL. How quickly do brains catch up with bodies? A comparative  
1181 method for detecting evolutionary lag. *Proc R Soc B*. 1999;266(1420):687-94.
- 1182 63. Smaers JB, Dechmann DKN, Goswami A, Soligo C, Safi K. Comparative analyses of  
1183 evolutionary rates reveal different pathways to encephalization in bats, carnivorans, and  
1184 primates. *PNAS*. 2012;109(44):18006-11.
- 1185 64. Smaers JB, Rothman RS, Hudson DR, Balanoff AM, Beatty B, Dechmann DKN, et al.  
1186 The evolution of mammalian brain size. *Sci Adv*. 2021;7(18):eabe2101.
- 1187 65. van Schaik CP, Triki Z, Bshary R, Heldstab SA. A farewell to EQ: A new brain size  
1188 measure for comparative primate cognition. *bioRxiv*. 2021:2021.02.15.431238.
- 1189 66. Finlay B, Darlington RB. Linked regularities in the development and evolution of  
1190 mammalian brains. *Science*. 1995;268:1578-84.
- 1191 67. Finlay BL, Darlington RB, Nicastro N. Developmental structure in brain evolution.  
1192 *Behav Brain Sci*. 2001;24(2):263-78.
- 1193 68. Cantania K. Correlates and possible mechanisms of neocortical enlargement and  
1194 diversification in mammals. *Int J Comp Psychol*. 2004;17(1).
- 1195 69. Innocenti GM, Kaas JH. The cortex. *Trends Neurosci*. 1995;18(9):371-2.

- 1196 70. Kaas JH. The evolution of isocortex. *Brain Behav Evol.* 1995;46(4-5):187-96.
- 1197 71. Barton RA. Visual specialization and brain evolution in primates. *Proc R Soc B.*  
1198 1998;265(1409):1933-7.
- 1199 72. Jacobs GH. The distribution and nature of colour vision among the mammals. *Biol*  
1200 *Rev.* 1993;68(3):413-71.
- 1201 73. Jacobs GH. Variations in primate color vision: mechanisms and utility. *Evol*  
1202 *Anthropol.* 1994;3(6):196-205.
- 1203 74. Jacobs GH. Primate photopigments and primate color vision. *PNAS.* 1996;93(2):577-  
1204 81.
- 1205 75. Sussman RW. Primate origins and the evolution of angiosperms. *Am J Primatol.*  
1206 1991;23(4):209-23.
- 1207 76. Brothers L. The neural basis of primate social communication. *Motiv Emot.*  
1208 1990;14(2):81-91.
- 1209 77. Barton RA. Neocortex size and behavioural ecology in primates. *Proc R Soc B.*  
1210 1996;263(1367):173-7.
- 1211 78. Barton RA. Binocularity and brain evolution in primates. *PNAS.* 2004;101(27):10113-  
1212 5.
- 1213 79. Barton RA. Olfactory evolution and behavioral ecology in primates. *Am J Primatol.*  
1214 2006;68(6):545-58.
- 1215 80. Whiting BA, Barton RA. The evolution of the cortico-cerebellar complex in primates:  
1216 anatomical connections predict patterns of correlated evolution. *J Hum Evol.* 2003;44(1):3-  
1217 10.
- 1218 81. Butler AB, Hodos W. *Comparative vertebrate neuroanatomy: evolution and*  
1219 *adaptation.* 2nd ed. New Jersey: John Wiley & Sons Inc; 2005.

- 1220 82. Iwaniuk AN, Lefebvre L, Wylie DR. The comparative approach and brain-behaviour  
1221 relationships: a tool for understanding tool use. *Can J Exp Psychol.* 2009;63(2):150-9.
- 1222 83. Obayashi S, Suhara T, Kawabe K, Okauchi T, Maeda J, Akine Y, et al. Functional brain  
1223 mapping of monkey tool use. *NeuroImage.* 2001;14(4):853-61.
- 1224 84. Barton Robert A, Venditti C. Rapid evolution of the cerebellum in humans and other  
1225 great apes. *Curr Biol.* 2014;24(20):2440-4.
- 1226 85. Wolpert DM, Doya K, Kawato M. A unifying computational framework for motor  
1227 control and social interaction. *Philos Trans R Soc B.* 2003;358(1431):593-602.
- 1228 86. Oztop E, Wolpert D, Kawato M. Mental state inference using visual control  
1229 parameters. *Cogn Brain Res.* 2005;22(2):129-51.
- 1230 87. Smaers JB, Vanier DR. Brain size expansion in primates and humans is explained by a  
1231 selective modular expansion of the cortico-cerebellar system. *Cortex.* 2019;118:292-305.
- 1232 88. Smaers JB, Turner AH, Gómez-Robles A, Sherwood CC. A cerebellar substrate for  
1233 cognition evolved multiple times independently in mammals. *eLife.* 2018;7:e35696.
- 1234 89. Fernandes HBF, Peñaherrera-Aguirre M, Woodley of Menie MA, Figueredo AJ.  
1235 Macroevolutionary patterns and selection modes for general intelligence (G) and for  
1236 commonly used neuroanatomical volume measures in primates. *Intelligence.*  
1237 2020;80:101456.
- 1238 90. Isler K, van Schaik CP. Allomaternal care, life history and brain size evolution in  
1239 mammals. *J Hum Evol.* 2012;63(1):52-63.
- 1240 91. DeCasien AR, Higham JP. Primate mosaic brain evolution reflects selection on  
1241 sensory and cognitive specialization. *Nat Ecol Evol.* 2019;3(10):1483-93.
- 1242 92. Sakai ST, Arsznov BM, Hristova AE, Yoon EJ, Lundrigan BL. Big cat coalitions: a  
1243 comparative analysis of regional brain volumes in felidae. *Front Neuroanat.* 2016;10:99.



- 1244 93. Heldstab S, Isler K. Environmental seasonality and mammalian brain size evolution:  
1245 Wiley Online Library; 2019.
- 1246 94. Dunbar RIM, Shultz S. Understanding primate brain evolution. *Philos Trans R Soc B*.  
1247 2007;362(1480):649-58.
- 1248 95. Dunbar RIM, Shultz S. Why are there so many explanations for primate brain  
1249 evolution? *Philos Trans R Soc B*. 2017;372(1727):20160244.
- 1250 96. Isler K, Christopher Kirk E, Miller JM, Albrecht GA, Gelvin BR, Martin RD. Endocranial  
1251 volumes of primate species: scaling analyses using a comprehensive and reliable data set. *J*  
1252 *Hum Evol*. 2008;55(6):967-78.
- 1253 97. Stephan H, Frahm H, Baron G. New and revised data on volumes of brain structures  
1254 in insectivores and primates. *Folia Primatol*. 1981;35(1):1-29.
- 1255 98. Sallet J, Mars RB, Noonan MP, Andersson JL, O'Reilly JX, Jbabdi S, et al. Social  
1256 network size affects neural circuits in macaques. *Science*. 2011;334(6056):697-700.
- 1257 99. Powell J, Lewis PA, Roberts N, García-Fiñana M, Dunbar RIM. Orbital prefrontal  
1258 cortex volume predicts social network size: an imaging study of individual differences in  
1259 humans. *Proc R Soc B*. 2012;279(1736):2157-62.
- 1260 100. Dunbar RIM, Shultz S. Evolution in the social brain. *Science*. 2007;317(5843):1344-7.
- 1261 101. Stankowich T, Haverkamp PJ, Caro T. Ecological drivers of antipredator defenses in  
1262 carnivores. *Evolution*. 2014;68(5):1415-25.
- 1263 102. Wilman H, Belmaker J, Simpson J, de la Rosa C, Rivadeneira MM, Jetz W. EltonTraits  
1264 1.0: Species-level foraging attributes of the world's birds and mammals. *Ecology*.  
1265 2014;95(7):2027-.

- 1266 103. IUCN. The IUCN red list of threatened species [Internet]. United Kingdom:  
1267 International Union for Conservation of Nature and Natural Resources; 2021 [updated 2021,  
1268 cited Jul 2, 2020]. Available from: <https://www.iucnredlist.org/>.
- 1269 104. Deaner RO, Barton RA, van Schaik C. Primate brains and life histories: renewing the  
1270 connection. In: Kappeler PM, Pereira ME, editors. Primate life histories and socioecology.  
1271 Chicago: The University of Chicago Press; 2003. p. 233-65.
- 1272 105. Powell LE, Barton RA, Street SE. Maternal investment, life histories and the evolution  
1273 of brain structure in primates. *Proc R Soc B*. 2019;286(1911):20191608.
- 1274 106. Isler K, Van Schaik CP. How humans evolved large brains: comparative evidence. *Evol*  
1275 *Anthropol*. 2014;23(2):65-75.
- 1276 107. Weisbecker V, Goswami A. Brain size, life history, and metabolism at the  
1277 marsupial/placental dichotomy. *PNAS*. 2010;107(37):16216-21.
- 1278 108. DeCasien AR, Thompson NA, Williams SA, Shattuck MR. Encephalization and  
1279 longevity evolved in a correlated fashion in euarchontoglires but not in other mammals.  
1280 *Evolution*. 2018;72(12):2617-31.
- 1281 109. Street SE, Navarrete AF, Reader SM, Laland KN. Coevolution of cultural intelligence,  
1282 extended life history, sociality, and brain size in primates. *PNAS*. 2017;114(30):7908-14.
- 1283 110. Barton RA, Capellini I. Maternal investment, life histories, and the costs of brain  
1284 growth in mammals. *PNAS*. 2011;108(15):6169-74.
- 1285 111. Barrickman NL, Bastian ML, Isler K, van Schaik CP. Life history costs and benefits of  
1286 encephalization: a comparative test using data from long-term studies of primates in the  
1287 wild. *J Hum Evol*. 2008;54(5):568-90.
- 1288 112. Symonds MRE, Blomberg SP. A primer on phylogenetic generalised least squares. In:  
1289 Garamszegi LZ, editor. *Modern phylogenetic comparative methods and their application in*

1290 evolutionary biology: concepts and practice. Berlin, Heidelberg: Springer Berlin Heidelberg;  
1291 2014. p. 105-30.

1292 113. Upham NS, Esselstyn JA, Jetz W. Inferring the mammal tree: species-level sets of  
1293 phylogenies for questions in ecology, evolution, and conservation. *PLoS Biol.*  
1294 2019;17(12):e3000494.

1295 114. Schwarz G. Estimating the dimension of a model. *Ann Stat.* 1978;6(2):461-4, 4.

1296 115. Aiello LC, Wheeler P. The expensive-tissue hypothesis: the brain and the digestive  
1297 system in human and primate evolution. *Curr Anthropol.* 1995;36(2):199-221.

1298 116. Fish JL, Lockwood CA. Dietary constraints on encephalization in primates. *Am J Phys*  
1299 *Anthropol.* 2003;120(2):171-81.

1300 117. Graber SM. Social and ecological aspects of brain size evolution: a comparative  
1301 approach [PhD Thesis]. Zurich: University of Zurich; 2017.

1302 118. Layton R, O'Hara S. Human social evolution: a comparison of hunter gather and  
1303 chimpanzee social organization. In: Dunbar R, Gamble C, Gowlett J, editors. *Social brain,*  
1304 *distributed mind.* Oxford: British Academy; 2010. p. 85-115.

1305 119. Martin RD. Scaling of the mammalian brain: the maternal energy hypothesis.  
1306 *Physiology.* 1996;11(4):149-56.

1307 120. Heldstab SA, Isler K, Burkart JM, van Schaik CP. Allomaternal care, brains and fertility  
1308 in mammals: who cares matters. *Behav Ecol Sociobio.* 2019;73(6):71.

1309 121. Isler K, van Schaik CP. The expensive brain: a framework for explaining evolutionary  
1310 changes in brain size. *J Hum Evol.* 2009;57(4):392-400.

1311 122. Heldstab SA, Isler K, Schuppli C, van Schaik CP. When ontogeny recapitulates  
1312 phylogeny: Fixed neurodevelopmental sequence of manipulative skills among primates. *Sci*  
1313 *Adv.* 2020;6(30):eabb4685.

- 1314 123. Uomini N, Fairlie J, Gray RD, Griesser M. Extended parenting and the evolution of  
1315 cognition. *Philos Trans R Soc B*. 2020;375(1803):20190495.
- 1316 124. González-Lagos C, Sol D, Reader S. Large-brained mammals live longer. *J Evol Biol*.  
1317 2010;23:1064-74.
- 1318 125. Leggio MG, Chiricozzi FR, Clausi S, Tedesco AM, Molinari M. The neuropsychological  
1319 profile of cerebellar damage: the sequencing hypothesis. *Cortex*. 2011;47(1):137-44.
- 1320 126. Rochefort C, Arabo A, André M, Poucet B, Save E, Rondi-Reig L. Cerebellum shapes  
1321 hippocampal spatial code. *Science*. 2011;334(6054):385-9.
- 1322 127. Benson-Amram S, Dantzer B, Stricker G, Swanson EM, Holekamp KE. Brain size  
1323 predicts problem-solving ability in mammalian carnivores. *PNAS*. 2016;113(9):2532-7.
- 1324 128. Sakai ST, Arsznov BM. Carnivoran brains: effects of sociality on inter- and  
1325 intraspecific comparisons of regional brain volumes. In: Kaas JH, editor. *Evolutionary*  
1326 *neuroscience*. 2nd ed. London: Academic Press; 2020. p. 463-79.
- 1327 129. Healy SD, Rowe C. A critique of comparative studies of brain size. *Proc R Soc B*.  
1328 2007;274(1609):453-64.
- 1329

## Reviewer #1

1) I am not sure why this manuscript deals with just primates and carnivores. Why these two orders of mammals? Why not other orders such as rodents, lagomorphs, shrews, and bats? In fact, there are plenty of extensive datasets for these (and other) orders. For example, see Mace et al (1981) *J. Zool.* 193:333-354, which presents brain size data for 261 species of terrestrial small mammals, and Hutcheon et al. (2002) *Brain Behavior Evolution* 60:165-180 for 63 species of bats. I would have thought that a comparative approach across the entire class Mammalia would have been more fruitful than simply presenting data on primates and (incongruously) carnivores. The authors make no attempt to justify their selection of mammalian orders.

Whilst we understand that brain data are available for more species than which were included within the manuscript, we wanted to run analyses on a complete dataset with all covariates available for all species, as this enabled more robust analyses, especially when conducting model comparisons. We could access all the required covariates for primates and carnivores, which governed our choice. In addition, in efforts to address the current confusion within the field regarding the proposed selection pressures responsible for increased brain size, we chose to use both primate and carnivore data as these two groups have received considerable attention, and thus by drawing clarity within these two groups, further groups can be studied using more appropriate methods/procedures. **We have added wording to emphasise our reasoning for this choice.**

2) The literature cited is not representative of the field. A good deal of previous work has been omitted from this ms, including the two papers mentioned in (1) above, as well as Harvey et al. (1980) *PNAS* 77:4387-4389 (this paper explicitly deals with primate brain sizes). And there are many more papers that deal with ecological correlates of brain sizes that have not been mentioned.

**Additional citations have been added.**

3) Although the manuscript is generally well written, there are some sections that are difficult to interpret and/or to follow. This is particularly true for the Methods section, which is often ambiguous or at least incomplete. See below for where more detail is needed.

**Wording has been rephrased for added clarity.**

4) There is no definition of what is meant by the different brain volumes that are presented in the ms. For example, how was "endocranial brain volume" measured? And was it measured in the same way in the different papers where this information was extracted and collated? If not, then how can we be sure that we are comparing like with like?

5) The same comment applies to "neocortex" and "cerebellum" volumes.

**Definitions have been added for endocranial and regional brain volumes.** When sourcing all whole and regional brain volumes these measurement methods were considered to ensure the data was comparable. In terms of the ECV data, sources were checked for comparability and common measurement techniques were found between studies. We further tried to minimise the risk of this problem by sourcing data from whole datasets e.g., DeCasien et al., 2019 where the information has been weighted to account for multiple methods. However, this was more difficult with the carnivore data where regional brain volume data was tricky to source.

6) Again, how was social cohesion measured? I can see that it was scored on a point system of 1 to 4, but what does it mean for a species to have a social cohesion of 1? or 2? etc.

**Definition revised for greater clarity.**

7) I found the ecological data simplistic and not at all credible. The authors will need to justify exactly what they mean by each of the ecological variables. And then, they will need to convince the reader that the ecological data are actually meaningful. I am happy to include "diet" (although "frugivore" or "omnivore" are diet categories rather than strictly speaking diet itself (and the authors actually refer to diet categories, but they don't explicitly make the distinction). But what do they mean by diet breadth? According to their definition it is: "dietary breadth was also used, estimated using the total number of food sources used by a species". But what are these "food sources"? Are they the number of species of plants/animals taken? If so, an insectivorous species will by definition have a wider breadth than a carnivorous one (because there are more species of insects than vertebrates). If "sources" refers to something else, then what is it? And then, once the definition has been clearly stated, how can we be sure that the different studies have scored "number of food sources" in the same way?

**Definitions of dietary categories and dietary breadth revised for greater clarity. All dietary breadth data was taken from one source: Wilman et al., (2014) and is referred to in the manuscript.**

8) I have even more issue with the number of habitats used by a species. Wider ranging species will use a greater number of habitats, so why didn't the authors correct for this? Or simply use distributional range size instead of number of habitats?

Whilst we understand and appreciate this point, it does not always follow that wider ranging species will always use a greater number of habitats. One species may have a large home range size but may only move within the same habitat type. What we instead aim to look at here is whether the type of habitat matters, thus, do species which navigate and confront multiple habitat types, have larger brains than those which only move within one or two habitat types? Or vice versa? We also use home range size to proxy habitat use.

9) The authors do not mention where they get their home range sizes from in the ms (although these are clearly mentioned in the supplementary material). I find it hard to believe that the various range sizes compiled by numerous authors will be directly comparable due to differences in techniques used to estimate home range. Furthermore, there is enormous amount of variation in home range size, which is partly (and only partly) attributable to sex and age. Using a single metric is hardly informative or convincing.

We did not want to mention the citations specifically within the manuscript due to the high number of citations. We agree with this point about transferability of the methods used to measure home range size. We did our best to reduce the number of sources due to this problem, however, due to limited data availability, the only way to retrieve home range size for all species was to use data from multiple studies. To minimise the issue highlighted, we chose to use hectares to measure home range size as this was the most prevalent method found. We converted all home range data collected to this metric. We agree a single metric is not always useful, which is why we used both habitat variability and home range size to proxy habitat use.

10) Statistical analysis. This entire section (lines 218 to 239) needs to be reworked and more detail provided. And unambiguous statements rephrased. I will make just a few examples (but these are not the only problems).

**Wording has been rephrased for clarity.**

11) Lines 219-220 "using residuals from a regression line". Regression of what on what? And exactly using what regression? Simple linear regression e.g.  $\ln()$ ? On log transformed or untransformed data?

Phrase removed as this aspect has been moved to supplementary methods. This regression analysis is discussed in full within that document... "*Phylogenetic generalised least-squares regression analysis (PGLS) was used to regress log brain volume against log body mass*".

12) What is the encephalisation quotient and how was it calculated? In fact, the equation is presented a bit further down, so perhaps the authors just need to refer to this e.g. say something like "see below for equation".

Definition revised for greater clarity. This aspect – as mentioned above – has been moved to the supplementary methods.

13) Line 220. "The former method is often preferred...". But you can't use "former" when there are three methods presented. "Former" and "latter" can only be used when comparing two things.

Thank you for highlighting. Phrase removed.

14) Line 226. "...therefore we considered it prudent to use both methods in the analyses...". Which two methods are being referred to? Because the authors have mentioned three methods (which have even been numbered).

Phrase removed.

15) Please provide a basic description of "Phylogenetic generalised least-squares regression analysis" and how it differs from typical GLMs.

**Definition revised to provide greater clarity.**

16) VIF was used to check for collinearity (which is good). But what does it mean "almost all scores" were below 5. Which variables were autocorrelated? And were any removed from the analyses, as a result of this?

Almost all VIF scores produced were below 5, however there were a few outliers. For example, body mass and weaning age produced scores of 7.25 and 5.93, when inputted into the primate endocranial model. Whilst moderately high, we chose to retain all variables within the statistical models, as the scores were only found in a few models and were still considerably low. Thus, no variables were removed from the analyses. VIF scores were also checked when rerunning analyses, specifically when using the 'rest of brain' regional volume technique, with no scores produced of concern.

**This sentence has been updated to provide greater clarity.**

17) Possible limitations. I find this paragraph difficult to accept. The authors are well aware that any models with AICs within 2 points are not "statistically different". Then how can they justify their approach? To me, this is the weakest aspect of the ms, because it affects all of their interpretations. There must be better ways of dealing with this. For example, list all competing models, and then count the number of times a particular variable (e.g. social cohesion) appears in the top models? This may make the results much more difficult to interpret, but this may be because there really is no simple and easy answer to the question that they are asking. Simplifying a complex problem with incorrect statistics is not acceptable.

We appreciate this comment. We agree this was a weak point in the analyses. To address this highlighted shortcoming, rather than just choosing the model with the absolute lowest score, we have now adopted the approach of presenting and discussing the results of all the 'best fit' models, which usually included a subset of models (simply, all the models within 2 points of the absolute lowest model). We have also rerun the analysis using BIC rather than AIC, in acknowledgement of this scoring system being more conservative.

## **Reviewer #2**

- Line 33: See my comment in the Discussion section on the use of "counterbalancing".

### Wording rephrased.

- There is a critical part currently missing this section, which is an explicit discussion of how this study is different from the many previous analyses of brain ~ socioecology relationships (e.g., inclusion of more variables, updated phylogeny, higher individual/species sample sizes)?

Thank you for this comment, we agree this was lacking in the manuscript. **Introduction has been updated with this discussion.**

- Line 75: The importance of pair-bondedness to brain size evolution was also discussed in other papers, which should be cited here (Schillaci 2006, 2008; MacLean et al. 2009).
- Line 83: This reference is only for carnivores – please add a reference for primates.

### Citations added.

- Paragraph starting with Line 90:
  - I think a discussion of issues with relative brain size measures is important, however, I don't think it warrants using measures that have been previously established as inappropriate (i.e., residuals, EQ).
- Lines 141-144: Again, it is unnecessary to include analyses using EQ or brain size residuals.
- Lines 218-220: Again, it is unnecessary to include analyses using EQ or brain size residuals.
- Paragraph starting with Line 467: As previously mentioned, previous studies have demonstrated that the use of EQ or residuals is inappropriate, so I think this paragraph and the relevant results are unnecessary and make the overall findings harder to follow.

We appreciate that these methods have previously been suggested to be inappropriate for measuring the relationship between brain size and body mass. We feel it is necessary to further address this problem, however, especially considering we are using updated data, updated statistical analysis, more variables and an updated phylogenetic tree. **After considering this point, we decided to move the results produced using the methods of concern (i.e., residuals, EQ) to the supplementary material and these will no longer be discussed in the main manuscript.** This moves the focus away from those methods, but still allows the comparison between methods which may be useful to some readers.

- The findings from the most recent study on brain ~ body size evolution (Smears et al. 2021) should be considered/discussed here.
- Freckleton's (2009) "seven deadly sins of comparative analysis" should be mentioned here, as it includes a discussion on why it is inappropriate to use residuals as outcome variables in regression models.
- Lines 105-107 – Papers on lag between primate brain and body size should be mentioned here (e.g., Deaner and Nunn 1999).

### Thank you. Citations added.

- Line 108: It is unclear what "over statistically controlled methods" means here.

### Wording rephrased.

- Line 109: How and why does van Schaik et al. (2021) specifically demonstrate that EQ is inappropriate? The authors should elaborate a bit here.



**Some elaboration has been added, as recommended.**

- Paragraph starting with Line 111:
  - How would social and ecological variables specifically relate to neocortical and cerebellar functions?
- Increased brain size is the result of selection on specific abilities and related neural systems. Accordingly, at some point in this Introduction, I would appreciate a brief but explicit discussion of this (e.g., why might frugivory require greater visual information processing? Given that a large proportion of the brain is neocortex, and a large proportion of the neocortex is comprised of visual information processing areas, might this explain the link between something like frugivory and overall brain size?)

**These points are now discussed.**

- I think it would be appropriate to discuss Powell et al. (2019) here (currently only mentioned in the Discussion).

**Powell et al., (2019) has been discussed further in the methods section.**

- Line 126: What kind of “models”?

**Sentence has been elaborated upon.**

- Line 155: Please add sample sizes for the neocortex and cerebellum.

**Sample sizes updated.**

- Lines 157-161: This is Introduction material and should be removed from the Methods.
- Paragraph starting with Line 163: It might be useful to include some of this in the Introduction, since readers have any background surrounding issues with various “social complexity” measures.
- All descriptions of the links between socioecological variables and selection for cognitive abilities would be more appropriate in the Introduction.

**These sections have been moved to the introduction.**

- Lines 171-174: What were levels 2 and 3? How were pairbonded species or those that only sleep in pairs categorized? These levels need more explanation, especially since this “social cohesion” proxy was included in many best fit models in the Results.

**Agreed. Definition revised for greater clarity.**

- Lines 196-197: Diet imposes both temporal and spatial cognitive demands, so I suggest rewording this.
- Lines 200-203: The authors appear to be suggesting that certain life history variables are drivers of evolutionary changes in brain size. I suggest altering the language here to mimic that in Lines 421-424.

**Sentences rephrased for clarity.**

- Paragraph starting with Line 200: This section is missing a discussion of ideas that the relationship between brain size and lifespan is driven by maternal investment and between specific brain regions and developmental periods (see e.g., Barton et al. 2011; Powell et al. 2019)

**This point has been discussed.**

- Lines 238-239: Why was body mass used as the covariate for the neocortex and cerebellum models? Many other papers have used brain size (with the brain region of interest removed) or medulla size as a covariate. This decision should be justified in the text or analyses should be re-run using a brain size measure.

Thank you for this comment, we agree that this method needed to be altered. **Neocortex and cerebellum size were recalculated using endocranial volume minus the brain region of interest. Analyses were re-run using this brain size measure.** The method (brain transformations) section has been updated to reflect this change.

- Model comparisons section:
  - This section as written is unclear – were the best fit models within Models 1-4 first identified, and then combined to make Model 5?
  - In any case, I do not think this approach is appropriate since it may, in some cases, force the inclusion of low information variables into the “combined” model. It would be more appropriate to create models that include all combinations of all predictor variables, compare these models using information criterion (I suggest using BIC since it is more conservative), and then select the best fit model or subset of models (e.g., all models with  $\text{dBIC} < 2$ ) to present detailed results.

Models one to four contained all combinations of the predictor variables, specifically looking at 1) social, 2) ecological, 3) social & ecological and 4) life history. Then usually models 3 and 4 were combined to determine whether incorporating the models together produced a better information criterion score. I say usually because sometimes incorporating social variables did not improve the score, therefore models 2 and 4 were combined instead. This combined model was also compared against a model including all variables together. We chose to use this ‘combined’ model because it would take too much time to try every combination of the 11 variables, therefore we thought by combining best fit models, this would bypass this problem and produce superior models. We appreciate your comment about the inclusion of low information variables, and it is definitely something we considered. **After your suggestion, to better address the issue, the analyses have been re-run using BIC instead of AIC, due to the fact it is more conservative and would reduce the likelihood of low information variables being included. We also chose to present the results of the ‘best fit’ models, which was usually a subset of models (presenting all models within  $\text{dBIC} < 2$  of the absolute lowest model).**

- Lines 260-261: The meaning of “presently, and subsequently” is unclear.

**Phrase removed for clarity.**

- This section is a bit difficult to follow as written. I suggest, within each section, more clearly separating/identifying the different groups of results. I think it would be most appropriate to first discuss results using the information criterion (i.e., tell the readers which variables are

included in the best fit models) and then the frequentist results (i.e., tell the readers which coefficient estimates within the best fit model are “significant” and the direction of the relationship)?

**Thank you for this comment, we agree and the results section has been rewritten to allow greater clarity.**

- Table 2: The diet category results (DFrug, DOmni) only demonstrate differences between these dietary groups (frugivory and omnivory) and folivory. This needs to be explicitly stated in the relevant areas of the results section. In addition, models should be run with the levels switched so that potential differences between frugivory and omnivory can also be tested.

**Thank you for this comment, we agree that this needed highlighting. This has now been explicitly stated in the primate results section. In addition, as suggested, models were run with the levels switched, to identify any potential differences between frugivory and omnivory.** This was checked on all ‘best fit’ models where diet was included, thus, on both the primate neocortex and cerebellum combined models. To do this, primate regional volume data was used, with linear regression models implemented, using the same combination of variables seen in the combined models (Neo ~ D + HR + ML + WA, Cere ~ D + HR + ML + WA).

*Just included for your information...*

Looking at primate neocortex data, when folivory was used as the baseline, negative significant associations were found with both omnivory and frugivory. However, when frugivory was used as the baseline, a positive association was found with folivory, whereas a negative association was found with omnivory. When omnivory was used as the baseline, positive associations were found with both frugivory and folivory. Thus, folivores appear to have larger neocortex volumes when compared to those with frugivorous and omnivorous diets, and this statement holds when the levels are switched (frugivorous and omnivorous species have smaller neocortex volumes when compared to those with a folivorous diet). However, frugivores appear to have larger neocortex volumes when compared to omnivores, and again, this statement holds when the levels are switched (omnivorous species have smaller neocortex sizes when compared to frugivorous species).

Looking at primate cerebellum data, the results are similar; both folivorous and frugivorous species appear to have larger cerebellar volumes when compared to those with an omnivorous diet, with this statement holding when the levels are switched (omnivorous species have smaller cerebellum volumes when compared to those with folivorous and frugivorous diets). However, there appears to be no discernible difference between folivorous and frugivorous species in terms of cerebellum volume.

- Lines 287-288 and 303-304: Table 2 includes results from *best fit models only* – it would be appropriate to also mention Table 1.

**Table 1 has also been mentioned.**

- Lines 288-289: Diet is not included in the best fit model for ECV in Table 1, so I am a bit confused about the claim that diet is positively associated with all brain measures.

**What we meant by this sentence was that diet as a whole (dietary categories or dietary breadth) was associated with all brain measures. We agree this should have been better worded. This sentence has been removed, however, following the recommendation to no longer discuss the different brain measures in the main manuscript.**

- Paragraph starting in Line 345: The home range results for the neocortex are not mentioned.

**Thank you for pointing this out. We have now ensured all results are now appropriately discussed.**

- Lines 383-385: The finding that habitat variability is negatively correlated with relative brain size should be discussed in terms of previous work demonstrating a negative impact of seasonality on brain size (e.g., van Woerden et al. 2010).

**This correlation is no longer found after rerunning statistical analyses so has been removed.**

- Lines 409-410: This is not true. Powell et al. (2019) found correlations between specific brain regions (neocortex) and gestation length. Other regions were correlated with other developmental periods (e.g., cerebellum and juvenile period).

**Sentence updated to reflect this point.**

- Line 421: What does “counterbalance” mean? It sounds as if animals are actively participating in the evolution of these traits. Can the authors elaborate on how specific selection mechanisms would drive this “counterbalancing”?

**Sentence updated to reflect this point.**

- Lines 426-427: This sentence makes it seem that diet category is included in the best fit models for carnivores, which is not the case. I suggest removing the sentence.

**Sentence removed as recommended.**

- Lines 443-446: Sociality is not included in any of the best fit models of relative brain size, so this sentence is misleading as written.

**Sentence changed following reanalysis of data.**

- Lines 445-457: I would remove this sentence since the cerebellum is showing opposite trends across groups.

**Sentence removed.**
